# Supplementary material for: The first N-ligand assisted Pd catalyzed asymmetric synthesis of 3-arylsuccinimides as novel antifungal leads
Source: Royal Society of Chemistry journal article supplement (doi:10.1039/d1qo01510a), 2021-11-22

**Supplementary Information for**  
**The First N-Ligands Assisted Pd Catalyzed Asymmetric Synthesis of 3-Arylsuccinimides as Novel Antifungal Leads**

Jixing Lai,<sup>†</sup> Juan Yang,<sup>†</sup> Chen Yang,<sup>†</sup> René Csuk,<sup>‡</sup> Baoan Song,<sup>†</sup> Shengkun Li <sup>\*,†</sup>

<sup>†</sup>Laboratory Breeding Base of Green Pesticide and Agricultural Bioengineering, Key Laboratory of Green Pesticide and Agricultural Bioengineering, Ministry of Education, Guizhou University, Huaxi District, Guiyang 550025, China

<sup>‡</sup>Organic Chemistry, Martin-Luther-University Halle-Wittenberg, Kurt-Mothes-Str. 2, D-06120 Halle (Saale), Germany

Corresponding Author: Shengkun Li, E-mail: [sk1505@outlook.com](mailto:sk1505@outlook.com)

## Content

|                                                                            |           |
|----------------------------------------------------------------------------|-----------|
| <b>1. General Information .....</b>                                        | <b>3</b>  |
| <b>2. Synthesis and Structural Elucidation of Ligands .....</b>            | <b>4</b>  |
| 2.1 Synthesis of Ligand L15 .....                                          | 4         |
| 2.2 Synthesis of Ligand L16, L17 and L18 .....                             | 6         |
| <b>3. Enantioselective Addition of Arylboronic Acid to Maleamide .....</b> | <b>8</b>  |
| 3.1. General Procedure .....                                               | 8         |
| 3.2. Optimization of the Reaction Conditions .....                         | 9         |
| <b>4. Substrate Scopes of this Methodology .....</b>                       | <b>14</b> |
| 4.1 Substrate Scope of Maleimides .....                                    | 14        |
| 4.2 Substrate Scope of Ar-B(OH) <sub>2</sub> .....                         | 15        |
| <b>5. Antifungal Bioassay of 3-Arylsuccinimides .....</b>                  | <b>16</b> |
| 5.1 Initial Antifungal Screening .....                                     | 16        |
| 5.2 Precise Antifungal Test .....                                          | 18        |
| <b>6. Characterization of Chiral 3-Arylsuccinimides .....</b>              | <b>19</b> |
| <b>7. Heterocycle-oxazolines for Asymmetric Synthesis of 11h .....</b>     | <b>55</b> |
| <b>8. NMR spectra .....</b>                                                | <b>59</b> |

## 1. General Information

Unless otherwise stated, all solvents and reagents were purchased from commercial sources (Energy or Meryer Chemicals etc.), they were analytically pure and used without further purification. Anhydrous solvents were dried and distilled by standard techniques before use or were purchased from commercial sources (Energy Chemicals etc.).

Silica gel GF<sub>254</sub> and column chromatography silica gel for isolation (200-300 mesh) were both purchased from Qingdao Broadchem Industrial Co., Ltd. Reaction progress was monitored by thin-layer chromatography (TLC) on silica gel GF<sub>254</sub> with ultraviolet (UV<sub>254nm</sub> or UV<sub>365nm</sub>) detection. <sup>1</sup>H NMR and <sup>13</sup>C NMR spectra were recorded on a Bruker AV 400 spectrometers with CDCl<sub>3</sub> as solvent and tetramethylsilane as the internal standard. The chemical shifts ( $\delta$ ) were recorded in parts per million (ppm). Data for <sup>1</sup>H NMR are reported as follows: chemical shift ( $\delta$ : ppm), multiplicity (s, singlet; d, doublet; t, triplet; q, quartet; and m, multiplet), coupling constant (Hz), integration and assignment (*H*). Data for <sup>13</sup>C NMR are reported in terms of chemical shift ( $\delta$ : ppm).

The agriculturally important plant pathogens were provided by the College of Plant Protection, Nanjing Agricultural University (Nanjing, China).

## 2. Synthesis and Structural Elucidation of Ligands

### 2.1 Synthesis of Ligand L15

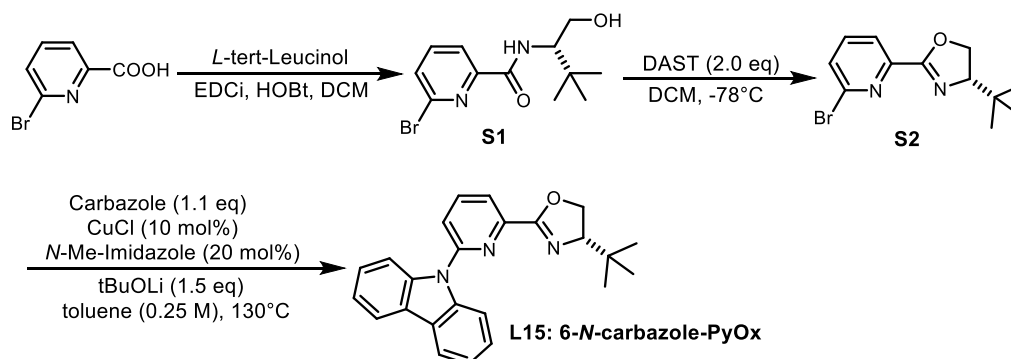

To a dried Schlenk flask charged with 6-Br-pyridine-2-carboxylic acid (10 mmol, 2.04 g) and *L*-tert-Leucinol (10 mmol, 1.17 g) was added anhydrous dichloromethane (100 mL) for dissolution. Hydroxybenzotriazole (HOBt) (1.75 g, 13 mmol) and *N*-(3-(dimethyl amino)-propyl)-*N'*-ethylcarbodiimide hydrochloride (EDC-HCl) (2.50 g, 13 mmol) were then added while the reaction flask was in an ice bath. The mixture was allowed to gradually warm to room temperature, and it was stirred overnight until full consumption of the carboxylic acid detected by thin layer chromatography (TLC). The mixture was quenched by the addition of a saturated aqueous solution of NaHCO<sub>3</sub> (50 mL) and separated. The water phase was extracted with dichloromethane (50 mL × 3), and the combined organic phase was sequentially washed with water (30 mL × 2) and saturated aqueous NaCl (30 mL), dried over anhydrous sodium sulfate, and concentrated under vacuum. Purification by silica gel column chromatography on silica gel with hexane/EtOAc (2:1, v/v) as the eluent gave the amide **S1** in 63% yield as white solid.

To a Schlenk tube charged the amide (5.0 mmol) was added anhydrous DCM (20.0 mL) under N<sub>2</sub> atmosphere. Diethylaminosulfur trifluoride (DAST) (1.6 g, 10 mmol) was added dropwise at -78°C. The reaction mixture was stirred at -78°C until the full consumption of



the starting material was detected by TLC. The mixture was quenched by the addition of a saturated aqueous solution of  $\text{NaHCO}_3$  (20 mL) and separated, The water phase was extracted with dichloromethane ( $20 \text{ mL} \times 3$ ), and the combined organic phase was sequentially washed with water ( $20 \text{ mL} \times 2$ ) and saturated aqueous  $\text{NaCl}$  (20 mL), dried over anhydrous sodium sulfate, and concentrated under vacuum. Purification by silica gel column chromatography on silica gel (200-300 m) with hexane/EtOAc (2:1, v/v) as the eluent gave the ligand **S2** in 65% yield as white solid.

To a Schlenk tube charged the **S2** (0.2 mmol),  $\text{tBuOLi}$  (0.3 mmol, 1.5 equiv),  $\text{CuCl}$  (0.02 mmol, 10 mol%), *N*-Me-Imidazole (0.04 mmol, 20 mol%) and carbazole (0.22 mmol, 1.1 equiv) was added anhydrous toluene (0.8 mL, 0.25 M) under  $\text{N}_2$  atmosphere. The reaction mixture was stirred at  $130^\circ \text{C}$  until the full consumption of the starting material was detected by TLC. The mixture was quenched by the addition of  $\text{H}_2\text{O}$  (5 mL) and separated, the water phase was extracted with EtOAc ( $5 \text{ mL} \times 3$ ), dried over anhydrous sodium sulfate, and concentrated under vacuum. Purification by silica gel column chromatography on silica gel (200-300 m) with hexane/EtOAc (15:1, v/v) as the eluent gave the ligand **L15** in 53% yield as white solid.

M.p.  $75\text{-}76^\circ \text{C}$ .  $^1\text{H}$ NMR (500 MHz,  $\text{CDCl}_3$ )  $\delta$  8.13-8.08 (m, 3H), 7.99 (t,  $J = 7.8 \text{ Hz}$ , 1H), 7.92 (d,  $J = 6.6 \text{ Hz}$ , 2H), 7.75 (dd,  $J_1 = 8.1 \text{ Hz}$ ,  $J_2 = 0.9 \text{ Hz}$ , 1H), 7.47 - 7.44 (m, 2H), 7.34-7.31 (m, 2H), 4.50 (dd,  $J_1 = 10.2 \text{ Hz}$ ,  $J_2 = 8.7 \text{ Hz}$ , 1H), 4.36 (t,  $J = 8.5 \text{ Hz}$ , 1H), 4.17 (dd,  $J_1 = 10.2 \text{ Hz}$ ,  $J_2 = 8.3 \text{ Hz}$ , 1H), 1.01 (s, 9H).  $^{13}\text{C}$ NMR (126 MHz,  $\text{CDCl}_3$ )  $\delta$  162.5, 151.6, 147.0, 139.5, 139.1, 126.5, 124.6, 121.3, 121.2, 120.4, 120.3, 111.4, 69.6, 34.2, 26.1.

## 2.2 Synthesis of Ligand L16, L17 and L18

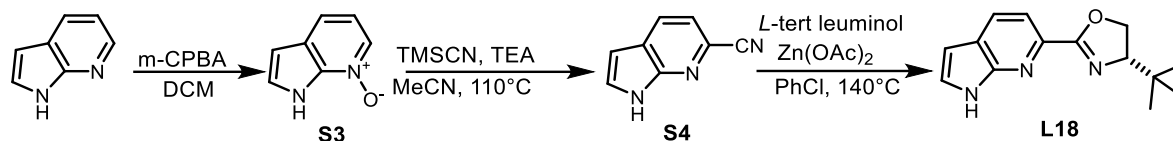

To a dried Schlenk flask charged with 7-azaindole (10 mmol, 1.18 g) was added anhydrous dichloromethane (100 mL) for dissolution. *m*-CPBA (15 mmol, 1.5 equiv) was then added while the reaction flask was in an ice bath. The mixture was allowed to gradually warm to room temperature, and it was stirred overnight until full consumption of the pyridine-2-ethyl detected by thin layer chromatography (TLC). The mixture was quenched by the addition of a saturated aqueous solution of NaHCO<sub>3</sub> (100 mL) and separated. The water phase was extracted with dichloromethane (100 mL  $\times$  3), dried over anhydrous sodium sulfate, and concentrated under vacuum to give the product **S3**, which can be used in next step without further purification.

To a Schlenk flask charged the nitrogen oxide **S3** (5.0 mmol) and TMS-CN (18 mmol, 3.6 equiv) was added anhydrous MeCN (20 mL). Triethylamine (TEA) (7.5 mmol, 1.5 equiv) was added dropwise. The reaction mixture was stirred at 110°C until the full consumption of the starting material was detected by TLC. The mixture was quenched by the addition of a saturated aqueous solution of NaHCO<sub>3</sub> (30 mL) and separated, The water phase was extracted with EtOAc (30 mL  $\times$  3), and the combined organic phase was sequentially washed with water (20 mL  $\times$  2) and saturated aqueous NaCl (20 mL), dried over anhydrous sodium sulfate, and concentrated under vacuum. Purification by silica gel column chromatography on silica gel (200-300m) with hexane/EtOAc (10:1, v/v) as the eluent gave the cyanated compound

**S4** (47% yield in two steps) as white solid.

To a Schlenk flask charged the compound **S4** (1.0 mmol) and  $\text{Zn}(\text{OAc})_2$  (0.2 mmol, 0.2 equiv) was added anhydrous  $\text{PhCl}$  (5 mL). Then *L*-tert-Leucinol (1.5 mmol, 1.5 equiv) was added. The reaction mixture was stirred at  $140^\circ\text{C}$  until the full consumption of the starting material was detected by TLC. The mixture was quenched by the addition of a saturated aqueous solution of  $\text{NaHCO}_3$  (5 mL) and separated. The water phase was extracted with  $\text{EtOAc}$  (5 mL  $\times$  3), and the combined organic phase was sequentially washed with water (5 mL  $\times$  2), dried over anhydrous sodium sulfate, and concentrated under vacuum. Purification by silica gel column chromatography on silica gel (200-300m) with hexane/ $\text{EtOAc}$  (5:1, v/v) as the eluent gave the I Ligand **L18** as white solid in 61% yield. M.p.  $189\text{--}192^\circ\text{C}$ .  $^1\text{H}$  NMR (500 MHz,  $\text{CDCl}_3$ )  $\delta$  8.03 (dd,  $J_1 = 0.7$  Hz,  $J_2 = 0.7$  Hz, 1H), 7.95 (d,  $J = 8.1$  Hz, 1H), 7.63 (dd,  $J_1 = 3.4$  Hz,  $J_2 = 2.6$  Hz, 1H), 6.55 (dd,  $J_1 = 3.4$  Hz,  $J_2 = 1.9$  Hz, 1H), 4.54 (dd,  $J_1 = 10.2$  Hz,  $J_2 = 8.4$  Hz, 1H), 4.43 (t,  $J = 8.1$  Hz, 1H), 4.21 (dd,  $J_1 = 10.1$  Hz,  $J_2 = 7.8$  Hz, 1H), 1.02 (s, 9H).  $^{13}\text{C}$  NMR (126 MHz,  $\text{CDCl}_3$ )  $\delta$  163.4, 148.3, 138.9, 129.6, 128.9, 122.9, 116.2, 100.3, 76.6, 69.2, 34.3, 26.1.

Ligands **L16** and **L17** were synthesized according to the same procedure as above.

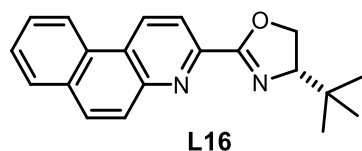

White solid. M.p.  $111\text{--}113^\circ\text{C}$ .  $^1\text{H}$  NMR (500 MHz,  $\text{CDCl}_3$ )  $\delta$  9.48 – 9.27 (m, 1H), 8.37 (d,  $J = 8.3$  Hz, 1H), 8.23 (d,  $J = 8.3$  Hz, 1H), 7.92 – 7.89 (m, 1H), 7.86 (d,  $J = 8.8$  Hz, 1H), 7.77

– 7.69 (m, 3H), 4.59 (dd,  $J_1 = 10.3$  Hz,  $J_2 = 8.6$  Hz, 1H), 4.44 (t,  $J = 8.5$  Hz, 1H), 4.21 (dd,  $J_1 = 10.3$  Hz,  $J_2 = 8.4$  Hz, 1H), 1.03 (s, 9H).

$^{13}\text{C}$  NMR (126 MHz,  $\text{CDCl}_3$ )  $\delta$  163.4, 146.1, 145.7, 136.4, 133.8, 131.6, 129.4, 128.7, 127.9, 127.5, 127.4, 125.1, 125.0, 122.1, 69.7, 34.3, 26.2.

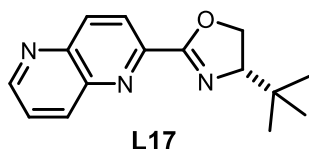

Colorless oil.  $^1\text{H}$  NMR (400 MHz,  $\text{CDCl}_3$ )  $\delta$  8.98 (dd,  $J_1 = 4.1$  Hz,  $J_2 = 1.7$  Hz, 1H), 8.40 (m, 2H), 8.33 (m, 1H), 7.65 (dd,  $J_1 = 8.6$  Hz,  $J_2 = 4.2$  Hz, 1H), 4.12 – 3.98 (m, 2H), 3.74 (dd,  $J_1 = 10.2$  Hz,  $J_2 = 8.0$  Hz, 1H), 1.04 (s, 9H).  $^{13}\text{C}$  NMR (101 MHz,  $\text{CDCl}_3$ )  $\delta$  164.7, 152.5, 150.3, 144.5, 142.0, 138.7, 137.8, 125.0, 122.6, 62.9, 60.4, 34.1, 27.1.

### 3. Enantioselective Addition of Arylboronic Acid to Maleimide

#### 3.1. General Procedure

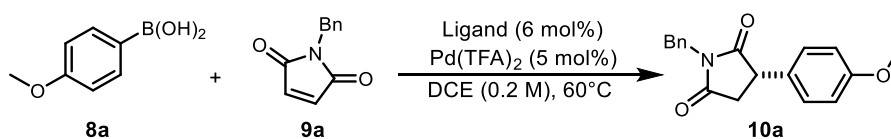

To a Schlenk tube charged with  $\text{Pd}(\text{TFA})_2$  (0.01 mmol, 3.3 mg, 5 mol%), ligand (0.012 mmol, 6 mol%) and 4-OMe- $\text{PhB}(\text{OH})_2$  (60.8 mg, 0.4 mmol, 2.0 eq) was added DCE (0.5 mL). The mixture was stirred at 60 °C for 15 min to afford the catalyst solution.

To the above solution was added *N*-Bn-Maleimide (37.4 mg, 0.2 mmol) and 0.5 mL DCE (The volume of DCE is 1.0 mL). The tube was placed in the modules of the reactor which

was set at 60°C. After stirring for 36 h, the solvent was removed by rotary evaporation.

The residue was purified by column chromatography (petroleum ether/EtOAc = 10/1, v/v) to give the desired chiral pyrrolidine-2,5-dione product 10a as white solid.

Bpy (2,2- Bipyridine) was utilized as a ligand for the preparation of the racemic products.

## **3.2. Optimization of the Reaction Conditions**

### **3.2.1 Ligand Screening<sup>a, b</sup>**

To select the appropriate chiral nitrogen-containing chiral ligand(s), *N*-benzylmaleimide and 4-methoxyphenylboronic acid were chosen as benchmark reaction partners. Versatile chiral ligands developed by our groups or synthesized according to the previous reports, were thoroughly tested.

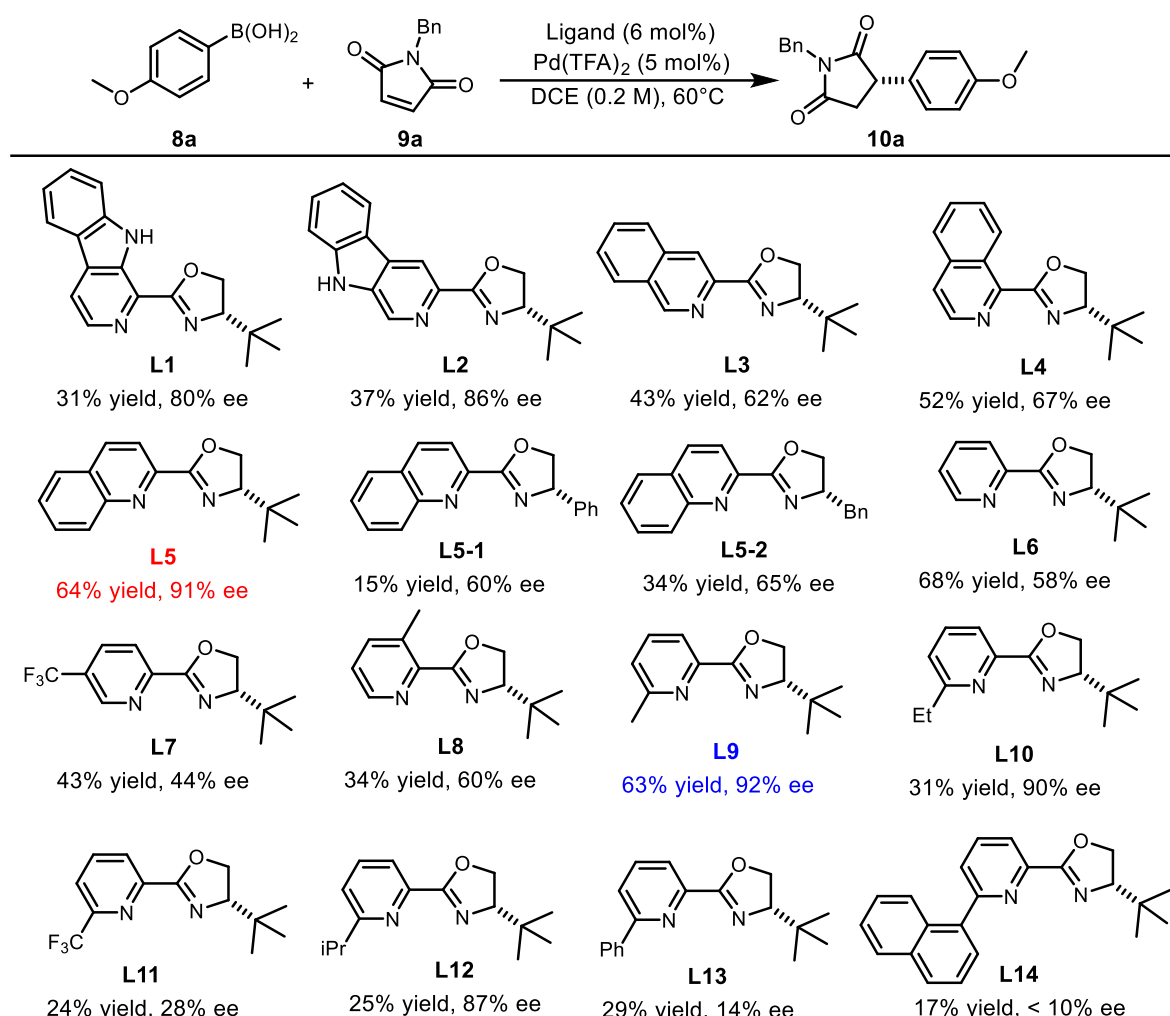

*a* All reactions were run at 0.2 mmol scale. *b* Isolated yield and ee determined by HPLC on a chiral stationary phase.

### 3.2.2 Solvent Screening <sup>a</sup>

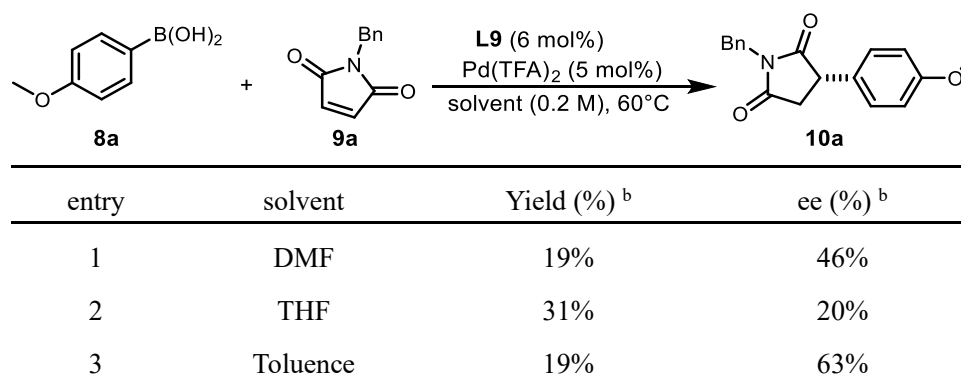

|                |                   |     |      |
|----------------|-------------------|-----|------|
| 4              | MeCN              | 15% | 34%  |
| 5              | DMSO              |     | N.D. |
| 6              | Butyl acetate     | 17% | 61%  |
| 7              | CHCl <sub>3</sub> | 9%  | 57%  |
| 8 <sup>c</sup> | MeOH              | 22% | 17%  |
| 9 <sup>d</sup> | DCM               | 53% | 78%  |

a All reactions were run at 0.2 mmol scale. b Isolated yield and ee determined by HPLC on a chiral stationary phase. c  $\beta^1$ -CarOx as Ligand. d temp as 40°C. N.D. = not detected.

### 3.2.3 Metal Screening <sup>a</sup>

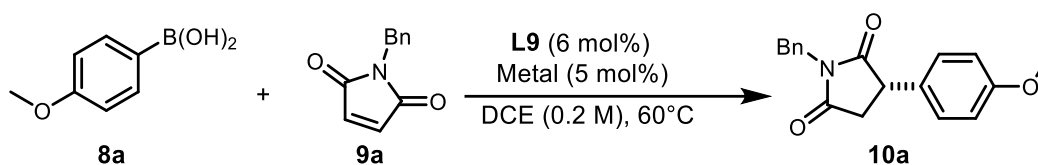

| entry | metal                                   | Yield (%) <sup>b</sup> | ee (%) <sup>b</sup> |
|-------|-----------------------------------------|------------------------|---------------------|
| 1     | Pd(OAc) <sub>2</sub>                    | 17%                    | 84%                 |
| 2     | PdCl <sub>2</sub>                       |                        | N.D.                |
| 3     | Cu(TFA) <sub>2</sub> ·H <sub>2</sub> O  |                        | N.D.                |
| 4     | Ni(OAc) <sub>2</sub> ·4H <sub>2</sub> O |                        | N.D.                |
| 5     | Ag <sub>2</sub> OTf                     |                        | N.D.                |

a All reactions were run at 0.2 mmol scale. b Isolated yield and ee determined by HPLC on a chiral stationary phase. N.D. = not detected.

### 3.2.4 Temperature Screening <sup>a</sup>

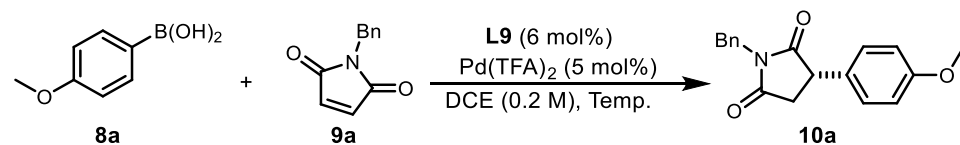

| entry | Temp. (°C) | Yield (%) <sup>b</sup> | ee (%) <sup>b</sup> |
|-------|------------|------------------------|---------------------|
| 1     | 40         | 17%                    | 83%                 |
| 2     | 60         | 63%                    | 91%                 |
| 3     | 80         | 9%                     | 77%                 |

a All reactions were run at 0.2 mmol scale. b Isolated yield and ee determined by HPLC on a chiral

stationary phase.

### 3.2.5 The Effect of the Amount of PMP-B(OH)<sub>2</sub><sup>a</sup>

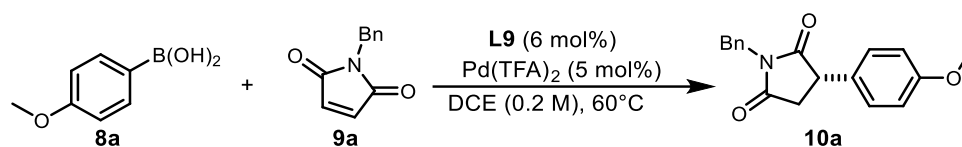

| entry | Amount of PMP-B(OH) <sub>2</sub> | Yield (%) <sup>b</sup> | ee (%) <sup>b</sup> |
|-------|----------------------------------|------------------------|---------------------|
| 1     | 1.5 eq                           | 46%                    | 92%                 |
| 2     | 2.0 eq                           | 63%                    | 92%                 |
| 3     | 3.0 eq                           | 33%                    | 89%                 |
| 4     | 4.0 eq                           | 31%                    | 89%                 |

a All reactions were run at 0.2 mmol scale. b Isolated yield and ee determined by HPLC on a chiral stationary phase.

### 3.2.6 The Effect of Aryl Boron Variants<sup>a</sup>

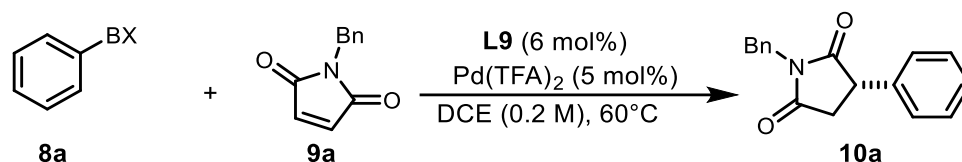

| entry | PhBX                | Yield (%) <sup>b</sup> | ee (%) <sup>b</sup> |
|-------|---------------------|------------------------|---------------------|
| 1     | PhBPin              | N.D.                   |                     |
| 2     | PhBF <sub>3</sub> K | N.D.                   |                     |
| 3     | (PhBO) <sub>3</sub> | N.D.                   |                     |
| 4     | PhBneop             | N.D.                   |                     |

a All reactions were run at 0.2 mmol scale. b Isolated yield and ee determined by HPLC on a chiral stationary phase. N.D. = not detected.

### 3.2.7 The Effect of the ratio of L11 to Pd(TFA)<sub>2</sub><sup>a</sup>

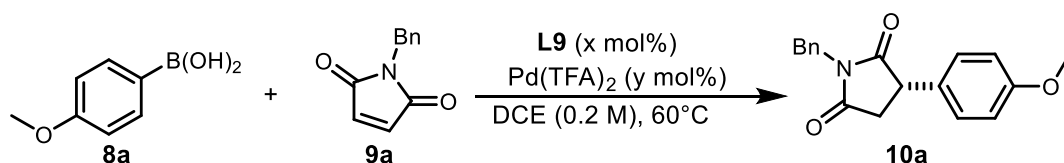



| entry | Pd(TFA) <sub>2</sub> /mol% | L9/mol% | Yield(%) <sup>b</sup> | ee (%) <sup>b</sup> |
|-------|----------------------------|---------|-----------------------|---------------------|
| 1     | 5%                         | 7.5%    | 29%                   | 72%                 |
| 2     | 5%                         | 6%      | 63%                   | 92%                 |
| 3     | 10%                        | 12%     | 46%                   | 77%                 |

a All reactions were run at 0.2 mmol scale. b Isolated yield and ee determined by HPLC on a chiral stationary phase.

### 3.2.8 The Effect of the Reaction Concentration<sup>a</sup>

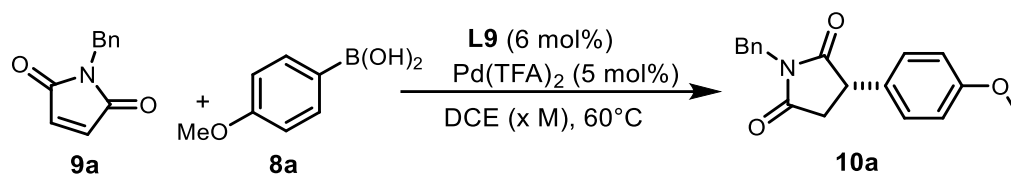

| entry | Amount of DCE  | Yield (%) <sup>b</sup> | ee (%) <sup>b</sup> |
|-------|----------------|------------------------|---------------------|
| 1     | 0.4 M (0.5 mL) | 70%                    | 83%                 |
| 2     | 0.2 M (1.0 mL) | 63%                    | 92%                 |
| 3     | 0.1 M (2.0 mL) | 55%                    | 96%                 |

a All reactions were run at 0.2 mmol scale. b Isolated yield and ee determined by HPLC on a chiral stationary phase.

### 3.2.9 Screening of Additive<sup>a</sup>

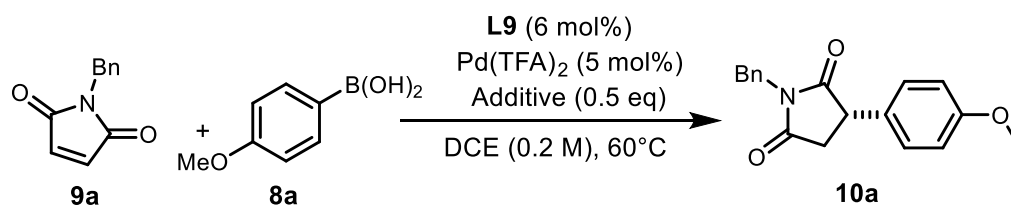

| entry | Additive                       | Yield (%) <sup>b</sup> | ee (%) <sup>b</sup> |
|-------|--------------------------------|------------------------|---------------------|
| 1     | K <sub>2</sub> CO <sub>3</sub> | 89%                    | 30.2%               |
| 2     | tBuOk                          | 57%                    | 79.9%               |
| 3     | PhCOOH                         | N.D.                   |                     |

a All reactions were run at 0.2 mmol scale. b Isolated yield and ee determined by HPLC on a chiral stationary phase. N.D. = not detected.

## 4. Substrate Scopes of this Methodology

### 4.1 Substrate Scope of Maleimides

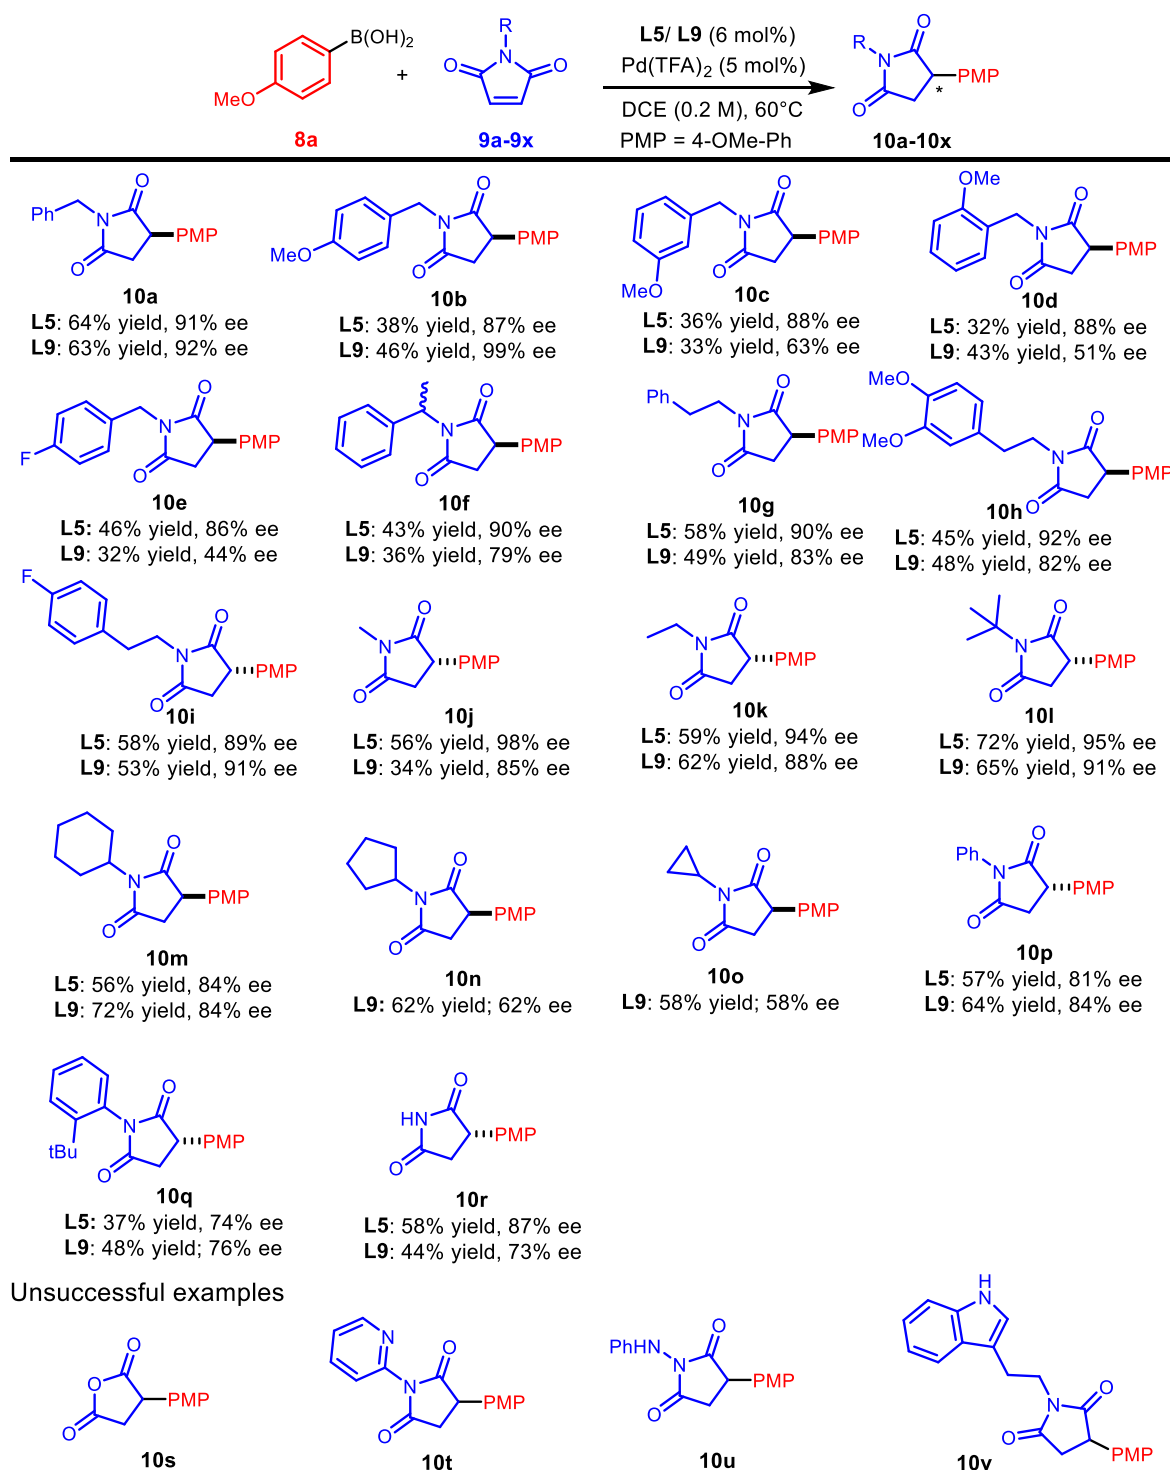

## 4.2 Substrate Scope of Ar-B(OH)<sub>2</sub>

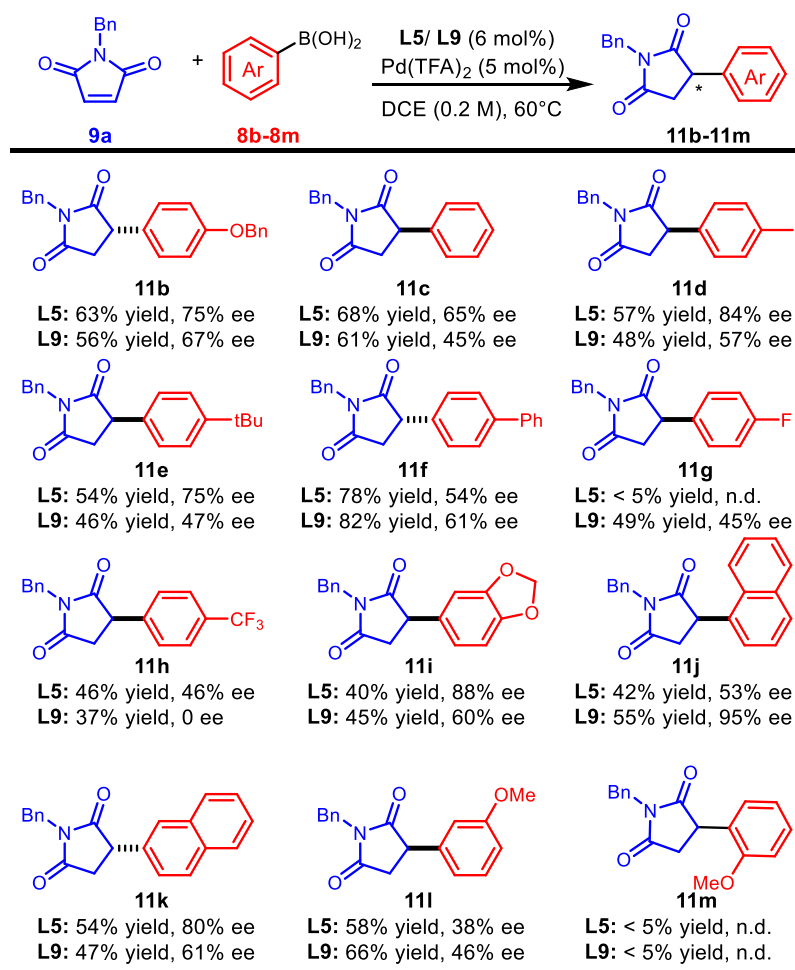

## 5. Antifungal Bioassay of 3-Arylsuccinimides

### 5.1 Initial Antifungal Screening

The antifungal activity of the target compounds was tested *in vitro* against the plant pathogenic fungi using the mycelium growth rate test. All the tested compounds were dissolved in DMSO at a concentration of mmol/mL. The media containing compounds at a concentration of 0.1 mmol/mL were then poured into Petri dishes for initial screening.

$$\text{Inhibition rate (\%)} = (C - T) / (C - 5 \text{ mm}) \times 100\%$$

Where *C*: The average diameter (in mm) of mycelia in the blank test, *T*: The average diameter (in mm) of mycelia on treated PDA with tested compounds.

| Compds.         | Inhibitory Rate at 100 uM (%) |            |            |            |            |
|-----------------|-------------------------------|------------|------------|------------|------------|
|                 | <i>R.s</i>                    | <i>S.s</i> | <i>B.c</i> | <i>F.g</i> | <i>P.o</i> |
| <i>rac</i> -10a | 7.9                           | 23.6       | 6.3        | 32         | 11.3       |
| <b>10a</b>      | 90.3                          | 66.7       | 90.9       | 33.6       | 58.1       |
| <i>rac</i> -10b | 3.4                           | 17.9       | 1.1        | 40.8       | 30.9       |
| <b>10b</b>      | 70.9                          | 30.5       | 90.9       | 14.1       | 44.8       |
| <i>rac</i> -10e | 30.3                          | 43.8       | 13.5       | 29.1       | 30.9       |
| <b>10e</b>      | 74.8                          | 71.4       | 70.1       | 28.9       | 52.4       |
| <i>rac</i> -10g | 23.6                          | 46.1       | 15.6       | 57.3       | 30.9       |
| <b>10g</b>      | 43.7                          | 23.8       | 90.9       | 18.8       | 29.5       |
| <i>rac</i> -10h | 64.1                          | 76.4       | 43.8       | 57.3       | 54.6       |
| <b>10h</b>      | 86.4                          | 53.3       | 75.6       | 30.5       | 61.9       |
| <i>rac</i> -10i | 0                             | 31.5       | 21.9       | 20         | 29.9       |
| <b>10i</b>      | 42.1                          | 32.6       | 16.7       | 4.9        | 27.8       |

|                 |      |      |      |      |      |
|-----------------|------|------|------|------|------|
| <i>rac</i> -10j | 43.2 | 34.8 | 32.3 | 33.9 | 25.8 |
| <b>10j</b>      | 8.7  | 0    | 29.3 | 0    | 20   |
| <i>rac</i> -10k | 24.3 | 23.6 | 35.4 | 24.3 | 29.9 |
| <b>10k</b>      | 39.8 | 12.4 | 26.8 | 0    | 16.2 |
| <i>rac</i> -10l | 75.3 | 40.8 | 33.3 | 41.7 | 33   |
| <b>10l</b>      | 64.1 | 2.9  | 29.9 | 7.8  | 26.7 |
| <i>rac</i> -10m | 44.9 | 62.9 | 16.7 | 22.3 | 34   |
| <b>10m</b>      | 98.1 | 98.1 | 36.6 | 35.9 | 60   |
| <i>rac</i> -10n | 19.7 | 42.7 | 8.2  | 18.4 | 23.7 |
| <b>10n</b>      | 0    | 14.6 | 2.8  | 29.1 | 11.2 |
| <i>rac</i> -10o | 75.3 | 10.1 | 1.1  | 30.1 | 11.3 |
| <b>10o</b>      | 40.4 | 28.1 | 0    | 30.1 | 9.3  |
| <i>rac</i> -10p | 64.1 | 55.1 | 41.7 | 36.9 | 25.8 |
| <b>10p</b>      | 67   | 26.7 | 50.1 | 10.9 | 25.7 |
| <i>rac</i> -11c | 43.8 | 60.7 | 26   | 39.8 | 37.1 |
| <b>11c</b>      | 84.5 | 46.7 | 90.9 | 26.6 | 60   |
| <i>rac</i> -11d | 37.1 | 40.4 | 37.5 | 39.8 | 58   |
| <b>11d</b>      | 90.3 | 81   | 90.9 | 23.4 | 60.9 |
| <i>rac</i> -11f | 20.2 | 34.8 | 27.1 | 36.9 | 27.8 |
| <b>11f</b>      | 43.7 | 29.5 | 90.9 | 25   | 41   |
| <i>rac</i> -11g | 31.5 | 55.1 | 15.6 | 32   | 23.7 |
| <b>11g</b>      | 76.4 | 97.7 | 47.9 | 47.6 | 65   |
| <i>rac</i> -11h | 64.1 | 83.1 | 37.4 | 46.6 | 62.3 |
| <b>11h</b>      | 98.1 | 98.1 | 90.9 | 59.3 | 71.4 |
| <i>rac</i> -11j | 75.7 | 60.9 | 64.6 | 8.6  | 78   |
| <b>11j</b>      | 98.1 | 73.3 | 90.9 | 37.5 | 82   |
| <i>S</i> -11j   | 65   | 41.9 | 79.3 | 23.4 | 71.4 |
| <i>boscalid</i> | 93.4 | 88.6 | 90.9 | 30.5 | 81.9 |

## 5.2 Precise Antifungal Test

In the precision antifungal test, the 20 mg/mL stock solution was diluted to 100, 50, 25, 12.5, 6.25, 3.125 uM and the above experiments were repeated for three times, the inhibition rates were calculated separately. The statistical analyses were performed by SPSS software version 20.0. Inhibition rate was calculated as follows,

$$\text{Inhibition rate (\%)} = (C - T) / (C - 5 \text{ mm}) \times 100\%$$

Where C: The average diameter (in mm) of mycelia in the blank test, T: The average diameter (in mm) of mycelia on treated PDA with tested compounds.

| Compds.         | EC <sub>50</sub> (uM) |            |            |            |
|-----------------|-----------------------|------------|------------|------------|
|                 | <i>R.s</i>            | <i>S.s</i> | <i>B.c</i> | <i>P.o</i> |
| <i>rac</i> -10m | 69.83                 | 39.99      | 214.04     | 128.76     |
| <b>10m</b>      | 39.31                 | 25.71      | 304.51     | 328.26     |
| <i>rac</i> -11d | 93.68                 | 134.38     | 107.06     | 40.91      |
| <b>11d</b>      | 46.99                 | 43.01      | 43.99      | 46.79      |
| <i>rac</i> -11h | 18.24                 | 14.32      | 33.27      | 29.65      |
| <b>11h</b>      | 32.03                 | 13.33      | 15.14      | 22.27      |
| <i>rac</i> -11j | 127.52                | 34.98      | 73.34      | 11.83      |
| <b>11j</b>      | 26.31                 | 50.11      | 44.41      | 16.12      |
| <i>S</i> -11j   | 118.7                 | 70.7       | 163.7      | 21.2       |
| <i>boscalid</i> | 1.22                  | 1.56       | 5.38       | 1.02       |

## 6. Characterization of Chiral 3-Arylsuccinimides

### (*R*)-1-benzyl-3-(4-methoxyphenyl) pyrrolidine-2,5-dione (10a)

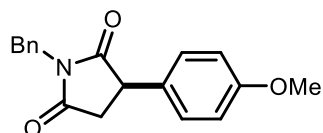

White solid. Yield: 64% yield (**L5**); 63% yield (**L9**).

The  $^1\text{H}$  NMR data is in accordance with that of previous publications. (*Chem. Eur. J.* **2015**, 21, 11050-11055)

$^1\text{H}$  NMR (500 MHz,  $\text{CDCl}_3$ ):  $\delta$  7.41-7.39 (m, 2H), 7.34-7.29 (m, 3H), 7.10-7.07 (m, 2H), 6.89-6.86 (m, 2H), 4.72 (dd,  $J_1 = 29.3$  Hz,  $J_2 = 14.1$  Hz, 2H), 3.98 (dd,  $J_1 = 9.6$  Hz,  $J_2 = 4.8$  Hz, 1H), 3.79 (s, 3H), 3.18 (dd,  $J_1 = 18.5$  Hz,  $J_2 = 9.5$  Hz, 1H), 2.79 (dd,  $J_1 = 18.5$  Hz,  $J_2 = 4.8$  Hz, 1H).

HPLC trace: Daicel chiralcel OD-H, hexane/ *i* -PrOH = 80/20, 220 nm, 1.1 mL/min.

**L5**:  $t_{R1} = 17.4$  min (major),  $t_{R2} = 20.8$  min (minor); ee = 90.5%.

**L9**:  $t_{R1} = 17.0$  min (major),  $t_{R2} = 20.6$  min (minor); ee = 91.7%.

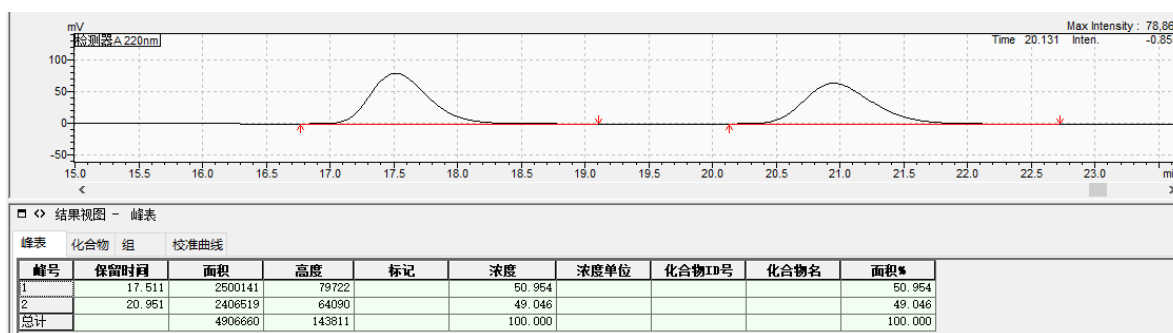

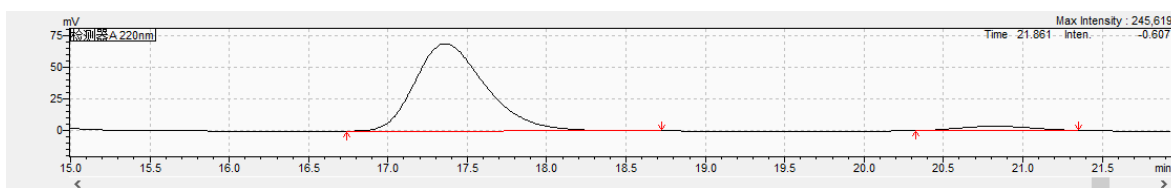

结果视图 - 峰表

峰表 化合物 组 校准曲线

| 峰号 | 保留时间   | 面积      | 高度    | 标记 | 浓度      | 浓度单位 | 化合物ID号 | 化合物名 | 面积%     |
|----|--------|---------|-------|----|---------|------|--------|------|---------|
| 1  | 17.360 | 2136434 | 69084 | M  | 95.228  |      |        |      | 95.228  |
| 2  | 20.821 | 107062  | 3405  | M  | 4.772   |      |        |      | 4.772   |
| 总计 |        | 2243496 | 72489 |    | 100.000 |      |        |      | 100.000 |

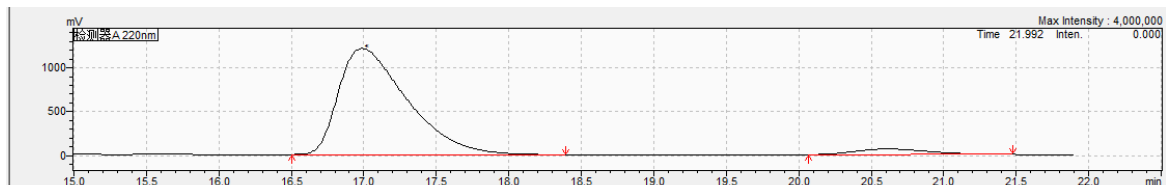

结果视图 - 峰表

峰表 化合物 组 校准曲线

| 峰号 | 保留时间   | 面积       | 高度      | 标记 | 浓度      | 浓度单位 | 化合物ID号 | 化合物名 | 面积%     |
|----|--------|----------|---------|----|---------|------|--------|------|---------|
| 1  | 16.988 | 39687545 | 1211053 | M  | 94.617  |      |        |      | 94.617  |
| 2  | 20.616 | 2257964  | 63741   | M  | 5.383   |      |        |      | 5.383   |
| 总计 |        | 41945509 | 1274794 |    | 100.000 |      |        |      | 100.000 |

### (R)-1-(4-methoxybenzyl)-3-(4-methoxyphenyl) pyrrolidine-2,5-dione (10b)

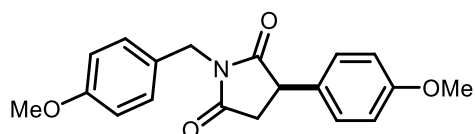

Colorless oil. Yield: 38% yield (**L5**); 46% yield (**L9**).

$^1\text{H}$  NMR (500 MHz,  $\text{CDCl}_3$ )  $\delta$  7.40 – 7.30 (m, 2H), 7.12 – 6.99 (m, 2H), 6.89-6.82 (m, 4H), 4.70 – 4.59 (dd,  $J = 2\text{H}$ ), 3.94 (dd,  $J_1 = 9.5\text{ Hz}$ ,  $J_2 = 4.7\text{ Hz}$ , 1H), 3.78 (s, 6H), 3.15 (dd,  $J_1 = 18.0\text{ Hz}$ ,  $J_2 = 9.6\text{ Hz}$ , 1H), 2.75 (dd,  $J_1 = 18.5\text{ Hz}$ ,  $J_2 = 4.7\text{ Hz}$ , 1H).

$^{13}\text{C}$  NMR (126 MHz,  $\text{CDCl}_3$ )  $\delta$  177.9, 176.1, 159.5, 159.3, 130.5, 129.3, 128.6, 128.3, 114.7, 114.1, 55.5, 55.4, 45.3, 42.3, 37.4.

HPLC trace: Daicel chiralcel AD-H, hexane/ *i* -PrOH = 70/30, 220 nm, 1.0 mL/min.

**L5**:  $t_{R1} = 12.4\text{ min}$  (minor),  $t_{R2} = 15.6\text{ min}$  (major); ee = 86.6%.

**L9**:  $t_{R1} = 12.2\text{ min}$  (minor),  $t_{R2} = 15.2\text{ min}$  (major); ee = 98.6%.



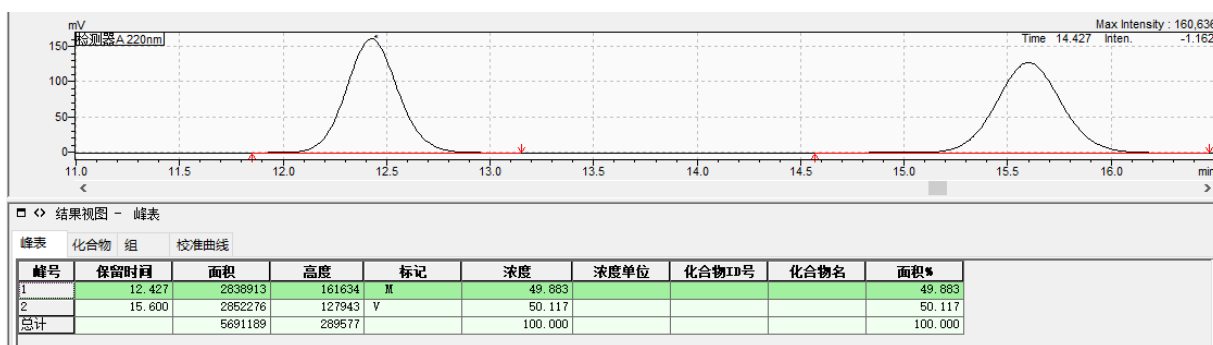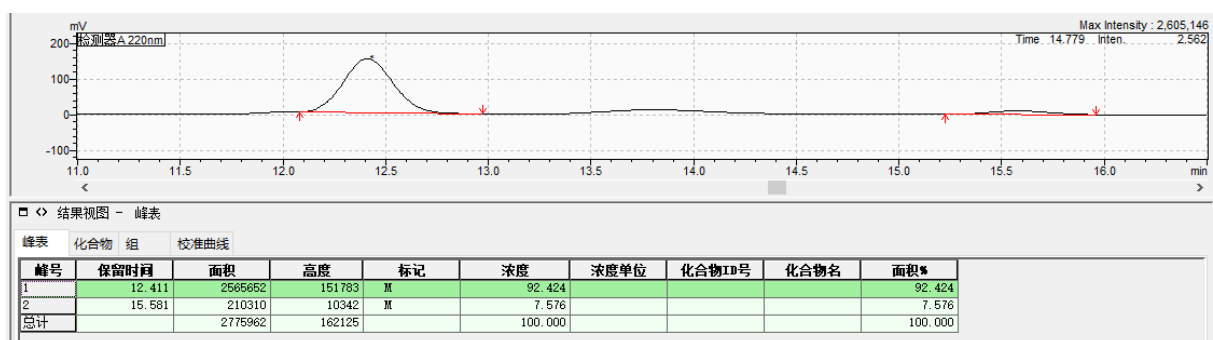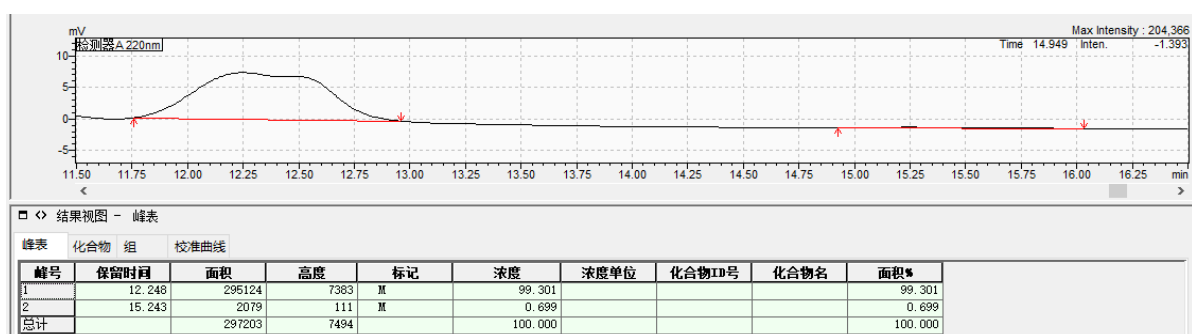

**(R)-1-(3-methoxybenzyl)-3-(4-methoxyphenyl) pyrrolidine-2,5-dione (10c)**

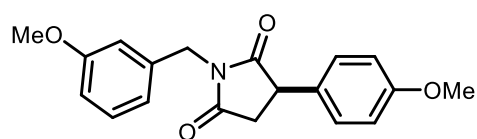

Colorless oil. Yield: 36% yield (**L5**); 33% yield (**L9**).

$^1\text{H}$  NMR (400 MHz,  $\text{CDCl}_3$ )  $\delta$  7.45 – 7.35 (m, 1H), 7.32 – 7.19 (m, 2H), 7.18 – 7.08 (m, 2H), 7.08 – 6.93 (m, 3H), 4.94 – 4.75 (m, 2H), 4.13 (dd,  $J_1 = 9.5$  Hz,  $J_2 = 4.8$  Hz, 1H), 3.94 (d,  $J = 3.6$  Hz, 6H), 3.34 (dd,  $J_1 = 18.0$  Hz,  $J_2 = 9.6$  Hz, 1H), 2.94 (dd,  $J_1 = 18.5$  Hz,  $J_2 = 4.8$  Hz, 1H).

$^{13}\text{C}$  NMR (101 MHz,  $\text{CDCl}_3$ )  $\delta$  177.8, 176.0, 159.8, 159.3, 137.3, 129.8, 129.2, 128.5, 121.0, 114.6, 114.1, 113.8, 55.4, 55.3, 45.2, 42.7, 37.3.

HPLC trace: Daicel chiralcel OD-H, hexane/ *i* -PrOH = 70/30, 220 nm, 1.0 mL/min.

**L5**:  $t_{\text{R}1}$  = 17.4 min (major),  $t_{\text{R}2}$  = 24.8 min (minor); ee = 88.0%.

**L9**:  $t_{\text{R}1}$  = 17.4 min (major),  $t_{\text{R}2}$  = 24.8 min (minor); ee = 63.4%.

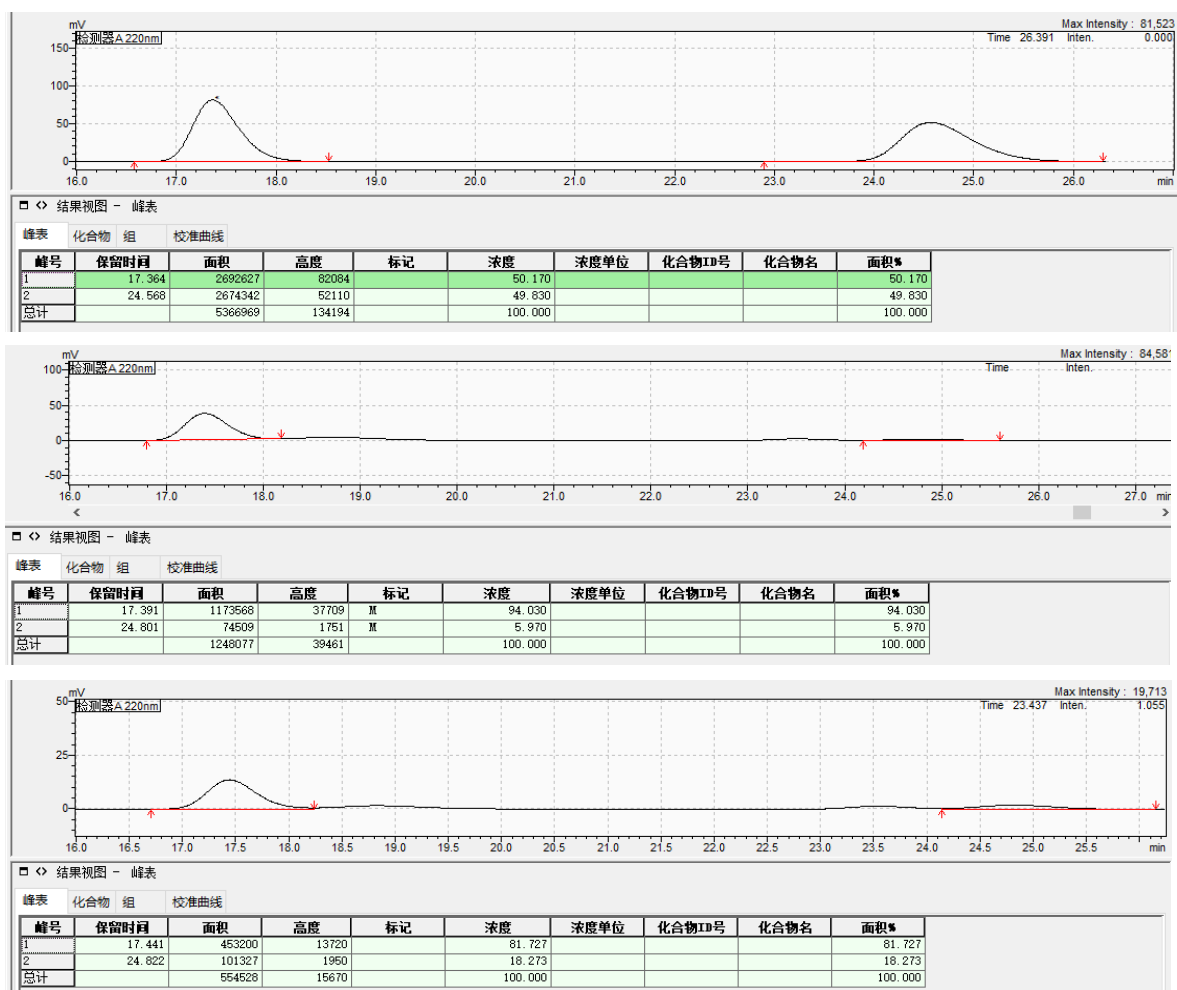

**(R)-1-(2-methoxybenzyl)-3-(4-methoxyphenyl) pyrrolidine-2,5-dione (10d)**

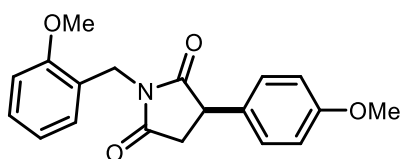

Colorless oil. Yield: 32% yield (**L5**); 43% yield (**L9**).

$^1\text{H}$  NMR (400 MHz,  $\text{CDCl}_3$ )  $\delta$  7.22 – 7.13 (m, 1H), 7.10 – 7.00 (m, 3H), 6.86 – 6.76 (m, 4H), 4.79 – 4.62 (m, 2H), 3.92 (dd,  $J_1 = 9.5$  Hz,  $J_2 = 4.7$  Hz, 1H), 3.72 (d,  $J = 3.4$  Hz, 6H), 3.13 (dd,  $J_1 = 18.4$  Hz,  $J_2 = 9.6$  Hz, 1H), 2.73 (dd,  $J_1 = 18.5$  Hz,  $J_2 = 4.7$  Hz, 1H).

$^{13}\text{C}$  NMR (101 MHz,  $\text{CDCl}_3$ )  $\delta$  176.7, 175.1, 158.3, 156.3, 128.5, 128.1, 128.1, 127.6, 122.5, 119.5, 113.7, 109.6, 54.5, 54.5, 44.3, 37.3, 36.3.

HPLC trace: Daicel chiralcel OD-H, hexane/ *i* -PrOH = 70/30, 220 nm, 1.0 mL/min.

**L5:**  $t_{\text{R}1} = 9.6$  min (major),  $t_{\text{R}2} = 19.5$  min (minor); ee = 87.8%.

**L9:**  $t_{\text{R}1} = 9.6$  min (major),  $t_{\text{R}2} = 19.5$  min (minor); ee = 50.6%.

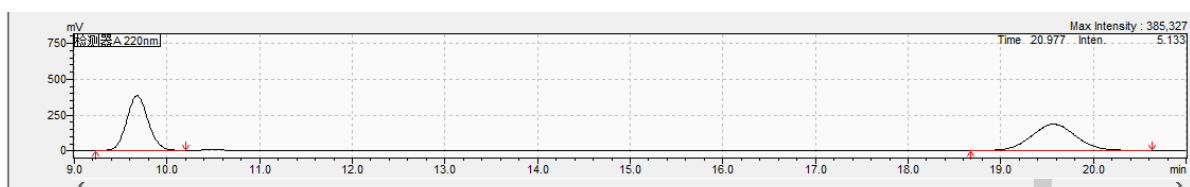

结果视图 - 峰表

| 峰号 | 保留时间   | 面积       | 高度     | 标记 | 浓度      | 浓度单位 | 化合物ID号 | 化合物名 | 面积%     |
|----|--------|----------|--------|----|---------|------|--------|------|---------|
| 1  | 9.678  | 6210838  | 382580 |    | 50.566  |      |        |      | 50.566  |
| 2  | 19.569 | 6071892  | 182296 | M  | 49.434  |      |        |      | 49.434  |
| 总计 |        | 12282730 | 564876 |    | 100.000 |      |        |      | 100.000 |

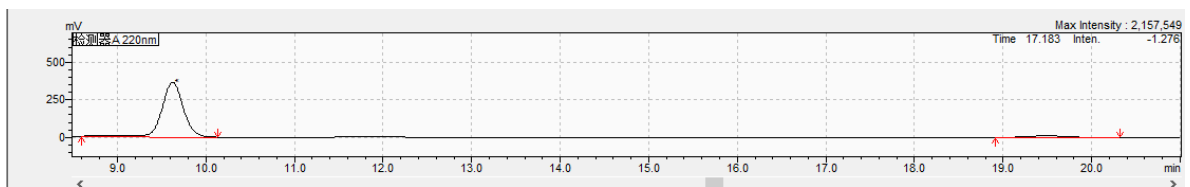

结果视图 - 峰表

| 峰号 | 保留时间   | 面积      | 高度     | 标记 | 浓度      | 浓度单位 | 化合物ID号 | 化合物名 | 面积%     |
|----|--------|---------|--------|----|---------|------|--------|------|---------|
| 1  | 9.624  | 6205745 | 362698 | M  | 93.919  |      |        |      | 93.919  |
| 2  | 19.494 | 401792  | 12091  |    | 6.081   |      |        |      | 6.081   |
| 总计 |        | 6607538 | 374789 |    | 100.000 |      |        |      | 100.000 |

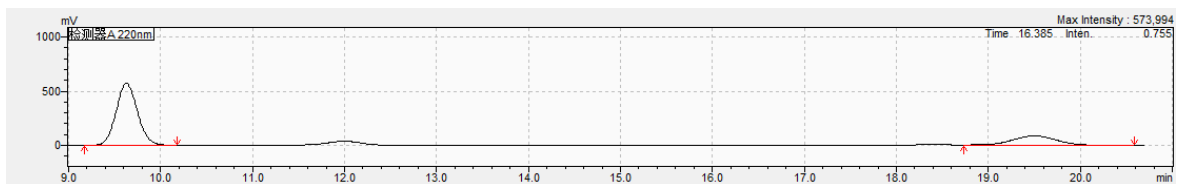

结果视图 - 峰表

| 峰号 | 保留时间   | 面积       | 高度     | 标记 | 浓度      | 浓度单位 | 化合物ID号 | 化合物名 | 面积%     |
|----|--------|----------|--------|----|---------|------|--------|------|---------|
| 1  | 9.629  | 9300746  | 573599 |    | 75.320  |      |        |      | 75.320  |
| 2  | 19.498 | 3047555  | 87709  |    | 24.680  |      |        |      | 24.680  |
| 总计 |        | 12348301 | 661308 |    | 100.000 |      |        |      | 100.000 |

**(R)-1-(4-fluorobenzyl)-3-(4-methoxyphenyl) pyrrolidine-2,5-dione (10e)**

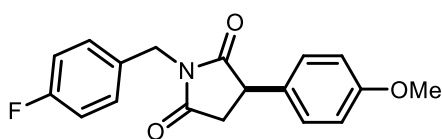

Colorless oil. Yield: 46% yield (**L5**); 32% yield (**L9**).

$^1\text{H}$  NMR (400 MHz,  $\text{CDCl}_3$ )  $\delta$  7.41-7.36 (m, 2H), 7.12 – 7.03 (m, 2H), 7.03 – 6.96 (m, 2H), 6.94 – 6.79 (m, 2H), 4.80 – 4.58 (m, 2H), 3.96 (dd,  $J_1 = 9.5$  Hz,  $J_2 = 4.7$  Hz, 1H), 3.79 (s, 3H), 3.18 (dd,  $J_1 = 18.5$  Hz,  $J_2 = 9.5$  Hz, 1H), 2.78 (dd,  $J_1 = 18.5$  Hz,  $J_2 = 4.7$  Hz, 1H).

$^{13}\text{C}$  NMR (101 MHz,  $\text{CDCl}_3$ )  $\delta$  177.8, 176.0, 162.6 (d,  $J = 247.8$  Hz), 159.4, 131.8 (d,  $J = 3.3$  Hz), 130.9 (d,  $J = 8.2$  Hz), 129.1, 128.5, 115.7 (d,  $J = 21.7$  Hz), 114.8, 55.5, 45.3, 42.1, 37.4.

HPLC trace: Daicel chiralcel OD-H, hexane/ *i* -PrOH = 70/30, 220 nm, 1.0 mL/min.

**L5**:  $t_{R1} = 19.2$  min (major),  $t_{R2} = 24.7$  min (minor); ee = 86.2%.

**L9**:  $t_{R1} = 19.3$  min (major),  $t_{R2} = 24.9$  min (minor); ee = 44.4%.

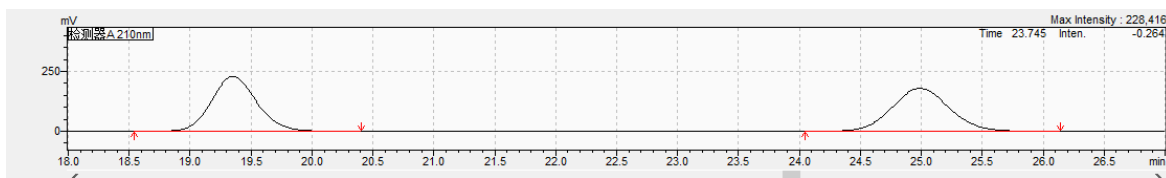

结果视图 - 峰表

| 峰号 | 保留时间   | 面积       | 高度     | 标记 | 浓度      | 浓度单位 | 化合物ID号 | 化合物名 | 面积%     |
|----|--------|----------|--------|----|---------|------|--------|------|---------|
| 1  | 19.350 | 5896973  | 228406 |    | 50.019  |      |        |      | 60.019  |
| 2  | 24.987 | 5892549  | 179133 | V  | 49.981  |      |        |      | 49.981  |
| 总计 |        | 11789522 | 407538 |    | 100.000 |      |        |      | 100.000 |

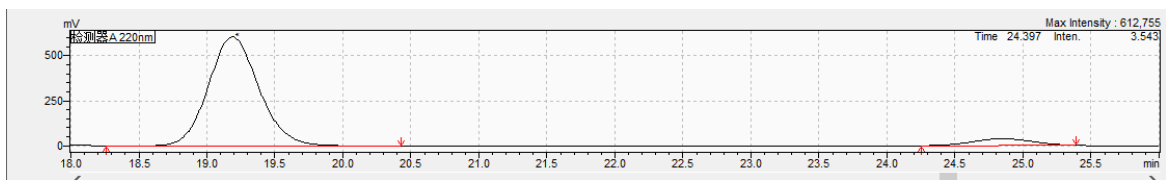

结果视图 - 峰表

| 峰号 | 保留时间   | 面积       | 高度     | 标记 | 浓度      | 浓度单位 | 化合物ID号 | 化合物名 | 面积%     |
|----|--------|----------|--------|----|---------|------|--------|------|---------|
| 1  | 19.189 | 15577017 | 604582 | M  | 93.098  |      |        |      | 93.098  |
| 2  | 24.851 | 1154908  | 37895  | M  | 6.902   |      |        |      | 6.902   |
| 总计 |        | 16731926 | 642477 |    | 100.000 |      |        |      | 100.000 |

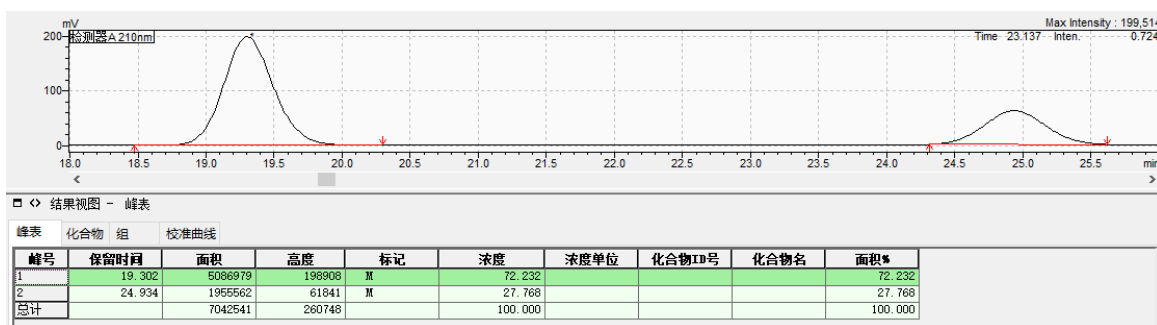

**(3R)-3-(4-methoxyphenyl)-1-(1-phenylethyl) pyrrolidine-2,5-dione (10f)**

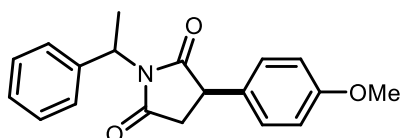

White solid. Yield: 43% yield (**L5**); 36% yield (**L9**).

$^1\text{H}$  NMR (500 MHz,  $\text{CHCl}_3$ )  $\delta$  7.38 (d,  $J = 7.3$  Hz, 2H), 7.28 – 7.16 (m, 3H), 7.02 – 6.93 (m, 2H), 6.82 – 6.74 (m, 2H), 5.42–5.36 (m, 1H), 3.80 (ddd,  $J_1 = 12.2$  Hz,  $J_2 = 9.7$  Hz,  $J_3 = 4.8$  Hz, 1H), 3.70 (d,  $J = 4.7$  Hz, 3H), 3.03 (dt,  $J_1 = 18.4$  Hz,  $J_2 = 9.4$  Hz, 1H), 2.64 (ddd,  $J_1 = 18.3$  Hz,  $J_2 = 8.5$  Hz,  $J_3 = 4.6$  Hz, 1H), 1.76 (dd,  $J_1 = 12.6$  Hz,  $J_2 = 7.4$  Hz, 3H).

$^{13}\text{C}$  NMR (126 MHz,  $\text{CHCl}_3$ )  $\delta$  178.0, 177.9, 176.1, 176.1, 159.3, 159.3, 139.7, 139.6, 129.5, 128.6, 128.5, 128.0, 127.9, 127.7, 127.6, 114.7, 114.6, 55.4, 50.8, 50.5, 45.0, 37.3, 37.2, 16.8, 16.5.

HPLC trace: Daicel chiralcel OD-H, hexane/ *i* -PrOH = 70/30, 220 nm, 1.0 mL/min.

**L5**:  $t_{R1} = 10.8$  min (major),  $t_{R2} = 13.2$  min (minor), ee = 90.2%.

$t_{R1} = 12.5$  min (major),  $t_{R2} = 14.6$  min (minor), ee = 89.0%.

**L9**:  $t_{R1} = 10.9$  min (major),  $t_{R2} = 13.2$  min (minor), ee = 83.8%.

$t_{R1} = 12.5$  min (major),  $t_{R2} = 14.6$  min (minor), ee = 75.2%.

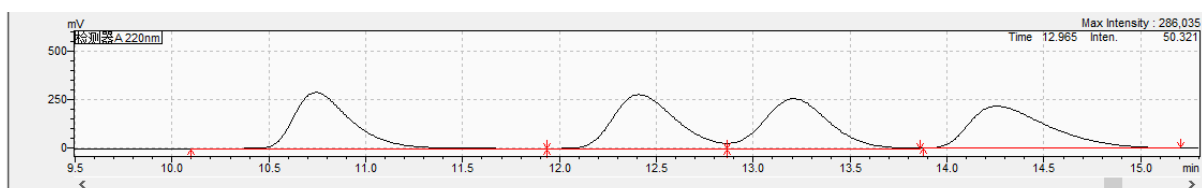

结果视图 - 峰表

| 峰号 | 保留时间   | 面积       | 高度      | 标记 | 浓度      | 浓度单位 | 化合物ID号 | 化合物名 | 面积%     |
|----|--------|----------|---------|----|---------|------|--------|------|---------|
| 1  | 10.743 | 5970115  | 291967  |    | 24.387  |      |        |      | 24.387  |
| 2  | 12.411 | 6273550  | 280341  | V  | 25.627  |      |        |      | 25.627  |
| 3  | 13.208 | 6009258  | 259472  | V  | 24.547  |      |        |      | 24.547  |
| 4  | 14.258 | 6227501  | 218777  | M  | 25.439  |      |        |      | 25.439  |
| 总计 |        | 24480425 | 1050558 |    | 100.000 |      |        |      | 100.000 |

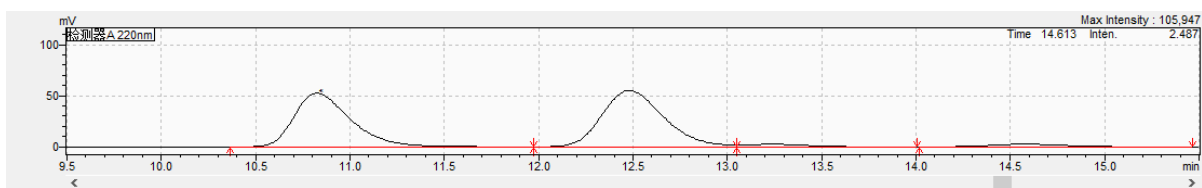

结果视图 - 峰表

| 峰号 | 保留时间   | 面积      | 高度     | 标记 | 浓度      | 浓度单位 | 化合物ID号 | 化合物名 | 面积%     |
|----|--------|---------|--------|----|---------|------|--------|------|---------|
| 1  | 10.825 | 1092609 | 52413  |    | 44.216  |      |        |      | 44.216  |
| 2  | 12.479 | 1249618 | 54991  | V  | 50.570  |      |        |      | 50.570  |
| 3  | 13.239 | 56276   | 2493   | V  | 2.277   |      |        |      | 2.277   |
| 4  | 14.578 | 72564   | 2585   |    | 2.937   |      |        |      | 2.937   |
| 总计 |        | 2471066 | 112482 |    | 100.000 |      |        |      | 100.000 |

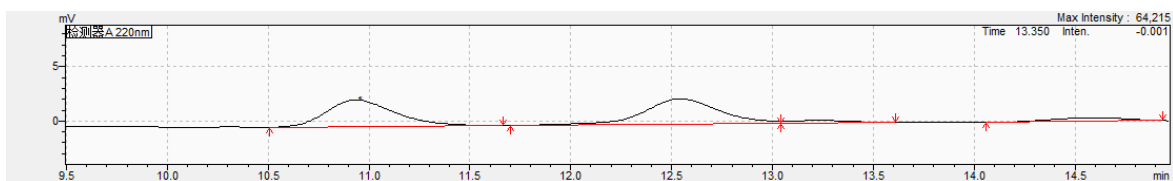

结果视图 - 峰表

| 峰号 | 保留时间   | 面积     | 高度   | 标记 | 浓度      | 浓度单位 | 化合物ID号 | 化合物名 | 面积%     |
|----|--------|--------|------|----|---------|------|--------|------|---------|
| 1  | 10.936 | 57341  | 2439 |    | 43.542  |      |        |      | 43.542  |
| 2  | 12.543 | 60691  | 2324 |    | 46.086  |      |        |      | 46.086  |
| 3  | 13.229 | 5064   | 240  | V  | 3.846   |      |        |      | 3.846   |
| 4  | 14.590 | 8594   | 332  |    | 6.526   |      |        |      | 6.526   |
| 总计 |        | 131691 | 5336 |    | 100.000 |      |        |      | 100.000 |

### (R)-3-(4-methoxyphenyl)-1-phenethylpyrrolidine-2,5-dione (10g)

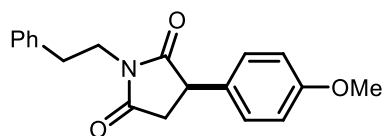

White solid. Yield: 58% yield (**L5**); 49% yield (**L9**).

$^1\text{H}$  NMR (500 MHz,  $\text{CHCl}_3$ )  $\delta$  7.21 (dd,  $J_1 = 7.9$  Hz,  $J_2 = 6.4$  Hz, 2H), 7.18 – 7.08 (m, 3H), 6.87 (d,  $J = 8.7$  Hz, 2H), 6.76 (d,  $J = 8.7$  Hz, 2H), 3.83 – 3.71 (m, 3H), 3.71 (s, 3H), 3.01 (dd,

$J_1 = 18.4$  Hz,  $J_2 = 9.6$  Hz, 1H), 2.87 (t,  $J = 7.8$  Hz, 2H), 2.59 (dd,  $J_1 = 18.4$  Hz,  $J_2 = 4.8$  Hz, 1H).

$^{13}\text{C}$  NMR (126 MHz,  $\text{CHCl}_3$ )  $\delta$  178.0, 176.2, 159.3, 137.7, 129.3, 129.1, 128.7, 128.5, 126.9, 114.6, 55.4, 45.1, 40.1, 37.3, 33.4.

HPLC trace: Daicel chiralcel AD-H, hexane/ *i* -PrOH = 70/30, 220 nm, 1.0 mL/min.

**L5:**  $t_{R1} = 9.5$  min (major),  $t_{R2} = 22.5$  min (minor); ee = 89.8%.

**L9:**  $t_{R1} = 9.6$  min (major),  $t_{R2} = 22.6$  min (minor); ee = 82.8%.

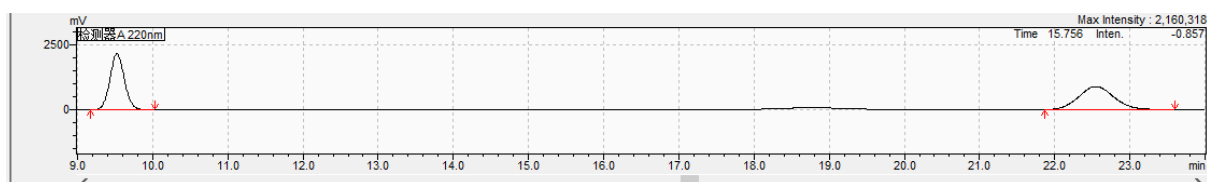

结果视图 - 峰表

峰表 化合物 组 校准曲线

| 峰号 | 保留时间   | 面积       | 高度      | 标记 | 浓度      | 浓度单位 | 化合物ID号 | 化合物名 | 面积%     |
|----|--------|----------|---------|----|---------|------|--------|------|---------|
| 1  | 9.524  | 28819336 | 2159124 | M  | 49.708  |      |        |      | 49.708  |
| 2  | 22.546 | 29158179 | 885721  | M  | 50.292  |      |        |      | 50.292  |
| 总计 |        | 57977514 | 3044845 |    | 100.000 |      |        |      | 100.000 |

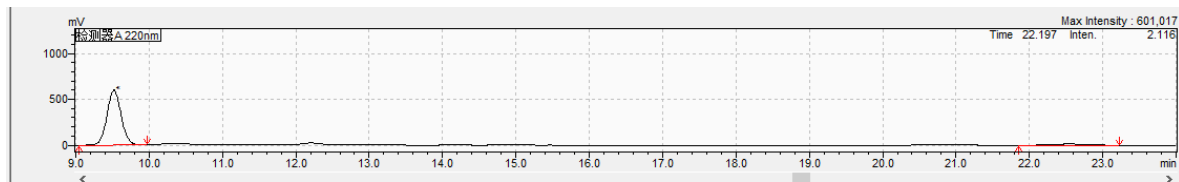

结果视图 - 峰表

峰表 化合物 组 校准曲线

| 峰号 | 保留时间   | 面积      | 高度     | 标记 | 浓度      | 浓度单位 | 化合物ID号 | 化合物名 | 面积%     |
|----|--------|---------|--------|----|---------|------|--------|------|---------|
| 1  | 9.619  | 8030834 | 599594 | M  | 94.920  |      |        |      | 94.920  |
| 2  | 22.545 | 429839  | 13538  | M  | 5.080   |      |        |      | 5.080   |
| 总计 |        | 8460673 | 613132 |    | 100.000 |      |        |      | 100.000 |

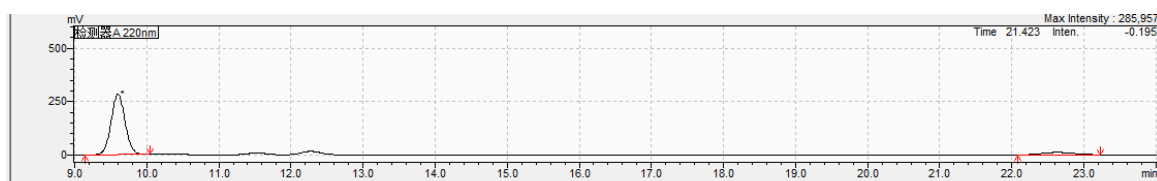

结果视图 - 峰表

峰表 化合物 组 校准曲线

| 峰号 | 保留时间   | 面积      | 高度     | 标记 | 浓度      | 浓度单位 | 化合物ID号 | 化合物名 | 面积%     |
|----|--------|---------|--------|----|---------|------|--------|------|---------|
| 1  | 9.600  | 3824687 | 284950 | M  | 91.398  |      |        |      | 91.398  |
| 2  | 22.631 | 359958  | 11466  | M  | 8.602   |      |        |      | 8.602   |
| 总计 |        | 4184645 | 296415 |    | 100.000 |      |        |      | 100.000 |

**(R)-1-(3,4-dimethoxyphenethyl)-3-(4-methoxyphenyl)pyrrolidine-2,5-dione (10h)**

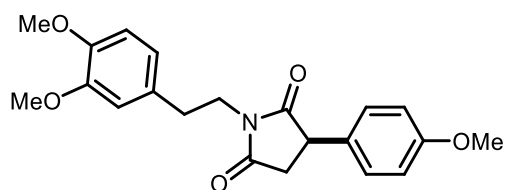

Colorless oil. Yield: 45% yield (**L5**); 48% yield (**L9**).

The  $^1\text{H}$  NMR data is in accordance with that of previous publications. (*Chem. Eur. J.* **2015**, 21, 11050-11055.)

$^1\text{H}$  NMR (400 MHz,  $\text{CHCl}_3$ )  $\delta$  8.32-8.27 (m, 2H), 7.79-7.75 (m, 1H), 7.64-7.60 (m, 1H), 6.82 – 6.69 (m, 3H), 5.36 (dd,  $J_1 = 8.7$  Hz,  $J_2 = 4.7$  Hz, 1H), 4.09 – 3.98 (m, 2H), 3.87 (s, 3H), 3.86-3.83 (m, 3H), 3.80 – 3.70 (m, 3H), 3.10 (dd,  $J_1 = 18.3$  Hz,  $J_2 = 8.7$  Hz, 1H), 2.90 – 2.81 (m, 2H), 2.61 (dd,  $J_1 = 18.3$  Hz,  $J_2 = 4.8$  Hz, 1H).

HPLC trace: Daicel chiralcel AD-H, hexane/ *i*-PrOH = 70/30, 220 nm, 1.0 mL/min.

**L5**:  $t_{\text{R}1} = 9.5$  min (major),  $t_{\text{R}2} = 22.5$  min (minor); ee = 92.2%.

**L9**:  $t_{\text{R}1} = 9.6$  min (major),  $t_{\text{R}2} = 22.6$  min (minor); ee = 82.4%.

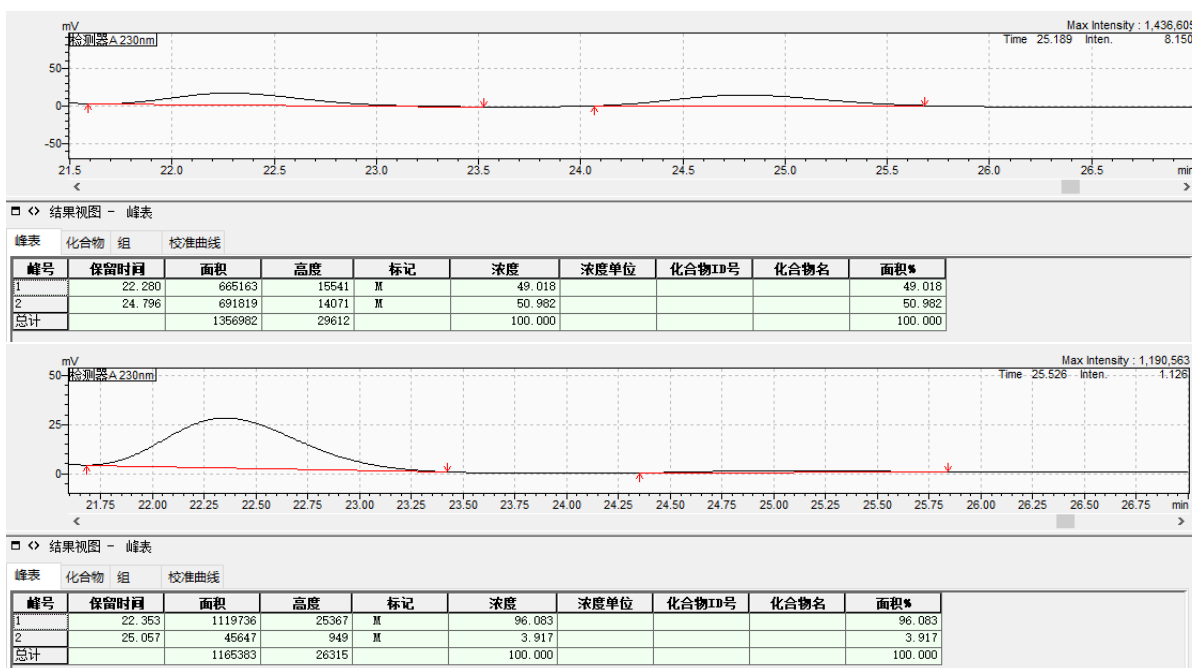



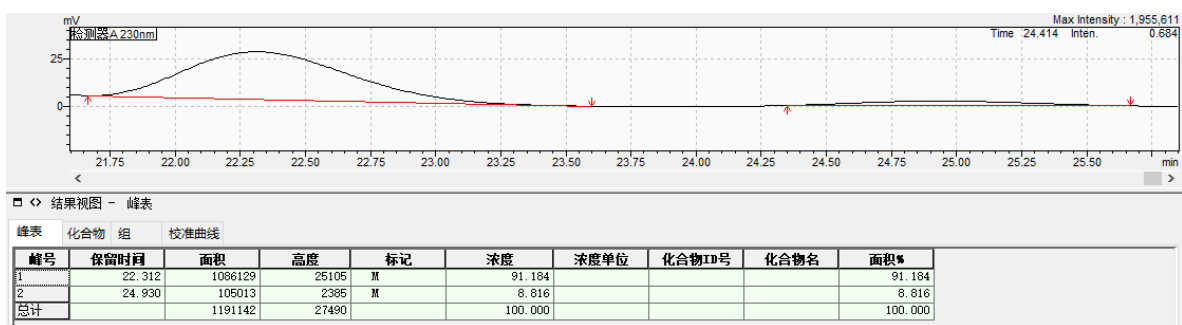

**(S)-1-(4-fluorophenethyl)-3-(4-methoxyphenyl)pyrrolidine-2,5-dione (10i)**

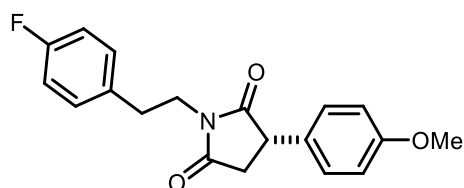

Colorless oil. Yield: 58% yield (**L5**); 53% yield (**L9**).

$^1\text{H}$  NMR (400 MHz,  $\text{CDCl}_3$ )  $\delta$  7.21 – 7.13 (m, 2H), 7.02 – 6.91 (m, 4H), 6.89 – 6.82 (m, 2H), 3.88 (dd,  $J_1 = 9.6$  Hz,  $J_2 = 4.6$  Hz, 1H), 3.86 – 3.74 (m, 5H), 3.11 (dd,  $J_1 = 18.5$  Hz,  $J_2 = 9.5$  Hz, 1H), 2.94 (td,  $J_1 = 7.4$  Hz,  $J_2 = 1.7$  Hz, 2H), 2.68 (dd,  $J_1 = 18.5$  Hz,  $J_2 = 4.7$  Hz, 1H).

$^{13}\text{C}$  NMR (101 MHz,  $\text{CDCl}_3$ )  $\delta$  178.0, 176.2, 162.5 (d,  $J = 245.7$  Hz), 159.3, 133.3 (d,  $J = 3.2$  Hz), 130.6, 130.5 (d,  $J = 8.1$  Hz), 129.2, 128.5, 115.5 (d,  $J = 21.3$  Hz), 114.7, 55.5, 45.1, 40.0, 37.2, 32.6.

HPLC trace: Daicel chiralcel AD-H, hexane/ *i* -PrOH = 70/30, 220 nm, 1.0 mL/min.

**L5**:  $t_{R1} = 26.5$  min (minor),  $t_{R2} = 27.5$  min (major); ee = 89.2%.

**L9**:  $t_{R1} = 26.6$  min (minor),  $t_{R2} = 27.6$  min (major); ee = 91.2%.

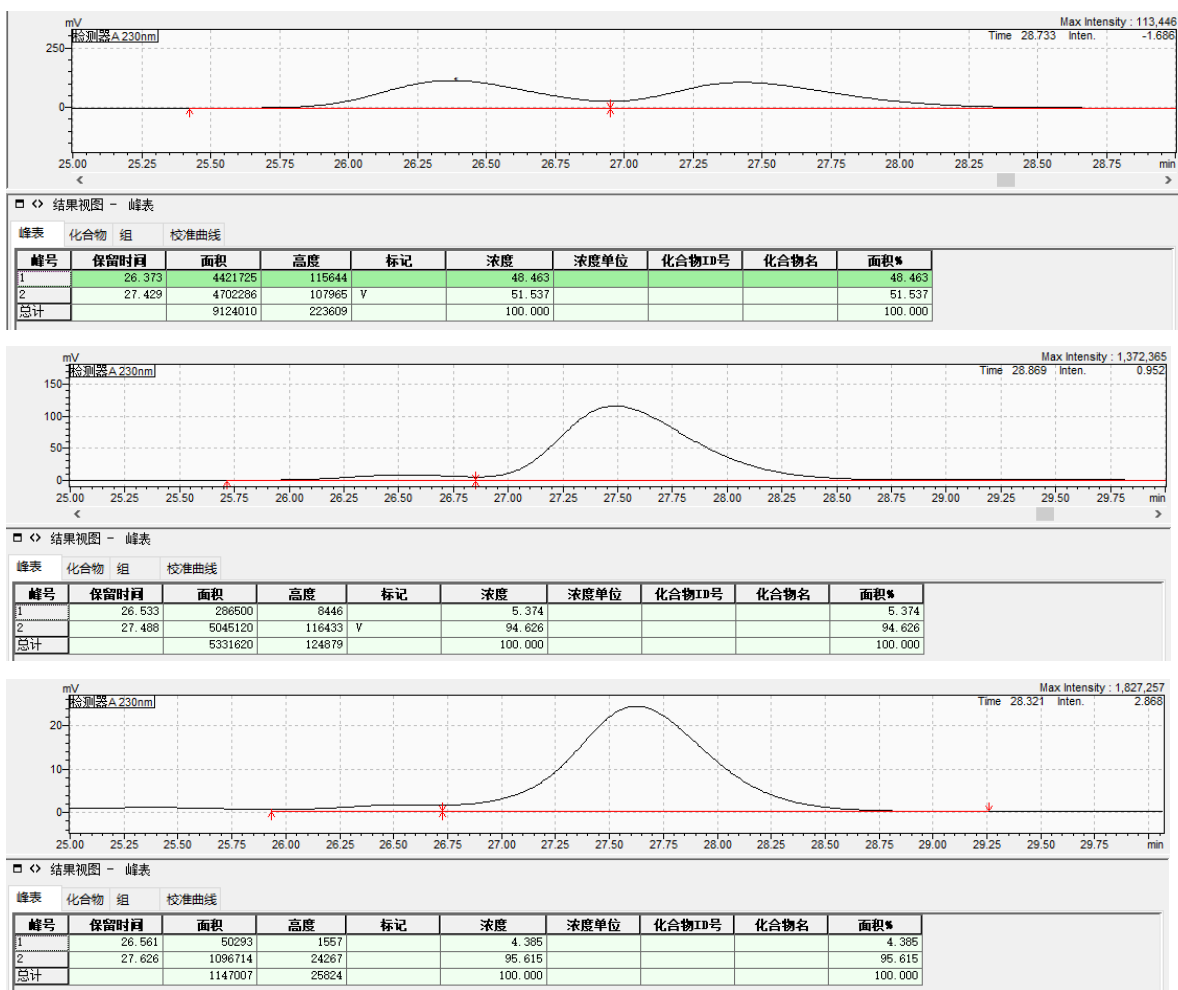

### (S)-3-(4-methoxyphenyl)-1-methylpyrrolidine-2,5-dione (10j)

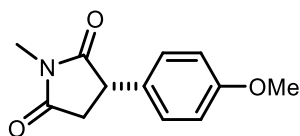

Colorless oil. Yield: 56% yield (**L5**); 34% yield (**L9**).

$^1\text{H}$  NMR (500 MHz,  $\text{CDCl}_3$ ):  $\delta$  7.16-7.13 (m, 2H), 6.91-6.88 (m, 2H), 3.98 (dd,  $J_1 = 9.6$  Hz,  $J_2 = 4.8$  Hz, 1H), 3.80 (s, 3H), 3.20 (dd,  $J_1 = 18.5$  Hz,  $J_2 = 9.6$  Hz, 1H), 3.06 (s, 3H), 2.80 (dd,  $J_1 = 18.5$  Hz,  $J_2 = 4.8$  Hz, 1H).

$^{13}\text{C}$  NMR (126 MHz,  $\text{CDCl}_3$ ):  $\delta$  178.3, 176.5, 159.3, 129.1, 128.6, 114.7, 55.4, 45.3, 37.3, 25.3.

HPLC trace: Daicel chiralcel OD-H, hexane/ *i* -PrOH = 80/20, 220 nm, 1.1 mL/min.

**L5:**  $t_{R1}$  = 17.6 min (major),  $t_{R2}$  = 18.8 min (minor); ee = 97.6%.

**L9:**  $t_{R1}$  = 17.4 min (major),  $t_{R2}$  = 18.6 min (minor); ee = 85.0%.

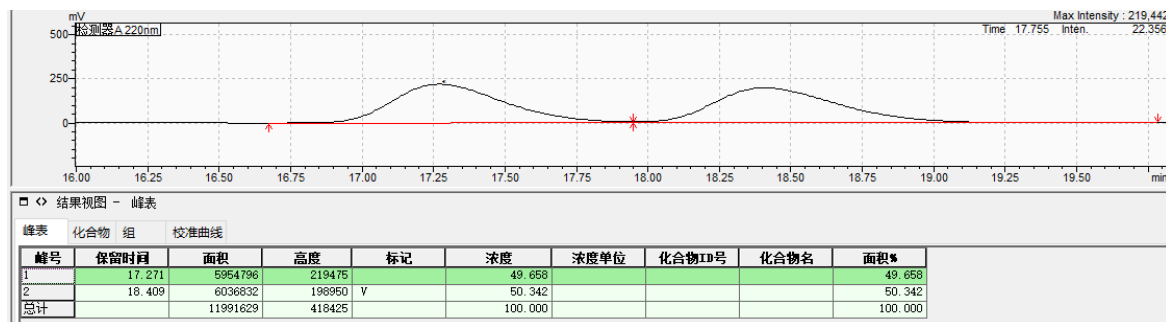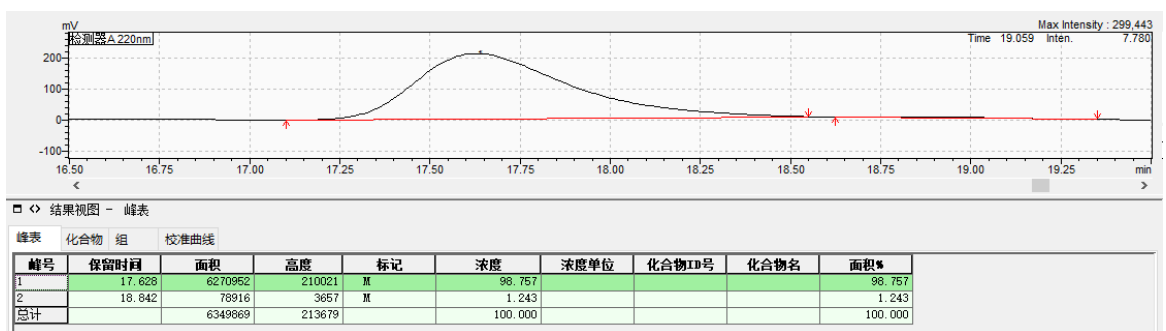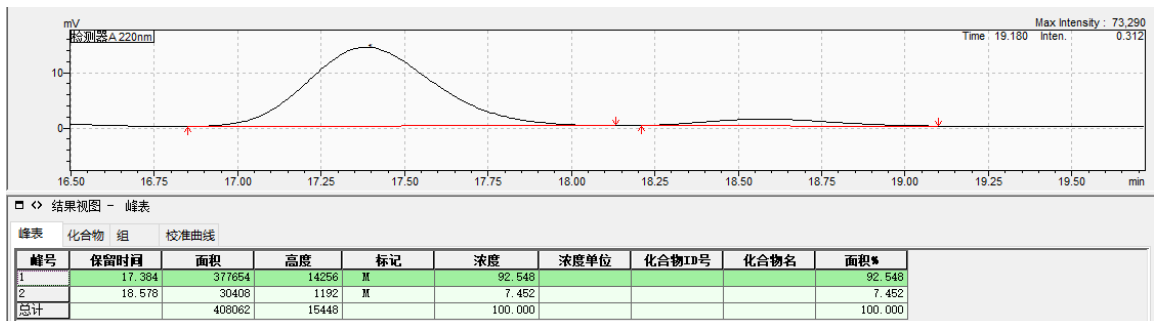

**(S)-1-ethyl-3-(4-methoxyphenyl) pyrrolidine-2,5-dione (10k)**

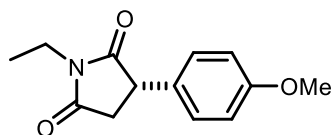

Colorless oil. Yield: 59% yield (**L5**); 62% yield (**L9**).

$^1\text{H}$  NMR (500 MHz,  $\text{CDCl}_3$ ):  $\delta$  7.14-7.11 (m, 2H), 6.91-6.88 (m, 2H), 3.95 (dd,  $J_1$  = 9.7 Hz,  $J_2$  = 4.6 Hz, 1H), 3.80 (s, 3H), 3.63 (dd,  $J_1$  = 14.4 Hz,  $J_2$  = 7.9 Hz, 2H), 3.16 (dd,  $J_1$  = 18.4

Hz,  $J_2 = 9.8$  Hz, 1H), 2.77 (dd,  $J_1 = 18.3$  Hz,  $J_2 = 4.5$  Hz, 1H), 1.21 (t,  $J = 7.0$  Hz, 3H).

$^{13}\text{C}$  NMR (126 MHz,  $\text{CDCl}_3$ ):  $\delta$  178.0, 176.3, 159.3, 129.3, 128.5, 114.7, 55.4, 45.2, 37.4, 34.1, 13.2.

HPLC trace: Daicel chiralcel OD-H, hexane/ *i* -PrOH = 80/20, 220 nm, 1.1 mL/min.

**L5:**  $t_{R1} = 12.9$  min (major),  $t_{R2} = 14.2$  min (minor); ee = 93.9%.

**L9:**  $t_{R1} = 12.4$  min (major),  $t_{R2} = 13.9$  min (minor); ee = 88.0%.

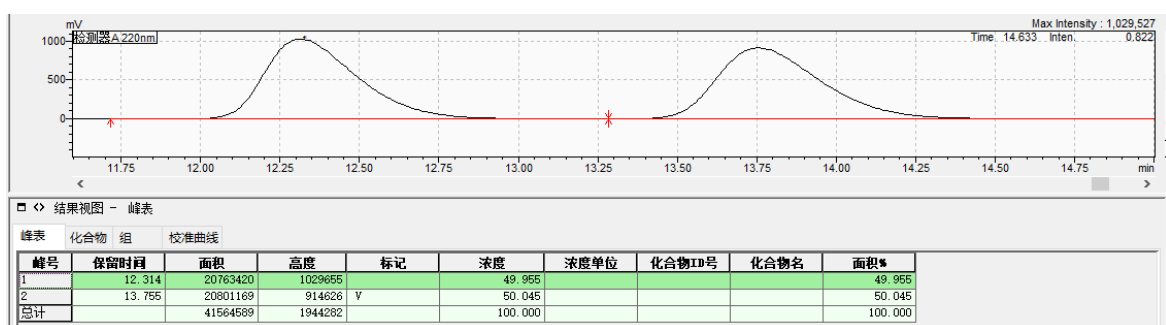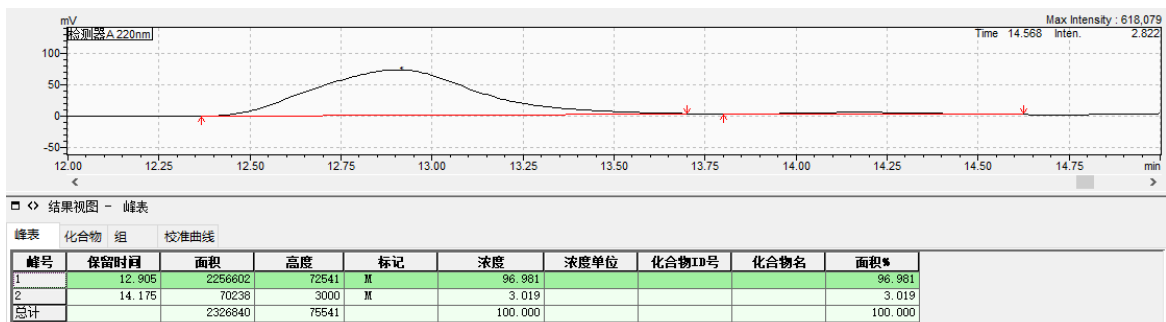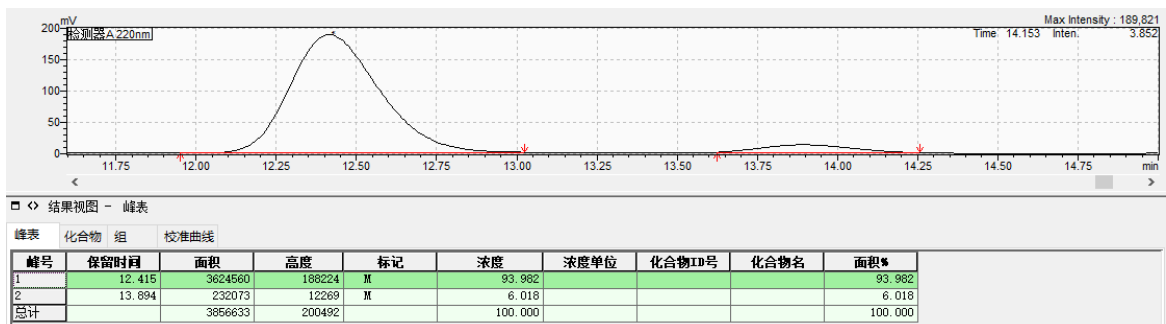

(*S*)-1-(*tert*-butyl)-3-(4-methoxyphenyl) pyrrolidine-2,5-dione (**10l**)

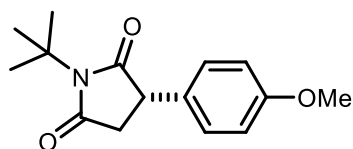

Colorless oil. Yield: 72% yield (**L5**); 65% yield (**L9**).

$^1\text{H}$  NMR (500 MHz,  $\text{CDCl}_3$ ):  $\delta$  7.14-7.11 (m, 2H), 6.91-6.88 (m, 2H), 3.82-3.79 (m, 4H), 3.06 (dd,  $J_1 = 17.9$  Hz,  $J_2 = 9.8$  Hz, 1H), 2.69 (dd,  $J_1 = 18.3$  Hz,  $J_2 = 4.9$  Hz, 1H), 1.60 (s, 9H).

$^{13}\text{C}$  NMR (126 MHz,  $\text{CDCl}_3$ ):  $\delta$  179.3, 177.5, 159.2, 130.0, 128.4, 114.6, 58.6, 55.4, 45.3, 37.6, 28.5.

HPLC trace: Daicel chiralcel OD-H, hexane/*i*-PrOH = 80/20, 220 nm, 1.1 mL/min.

**L5**:  $t_{R1} = 7.1$  min (major),  $t_{R2} = 9.0$  min (minor); ee = 94.5%.

**L9**:  $t_{R1} = 7.1$  min (major),  $t_{R2} = 9.0$  min (minor); ee = 90.6%.

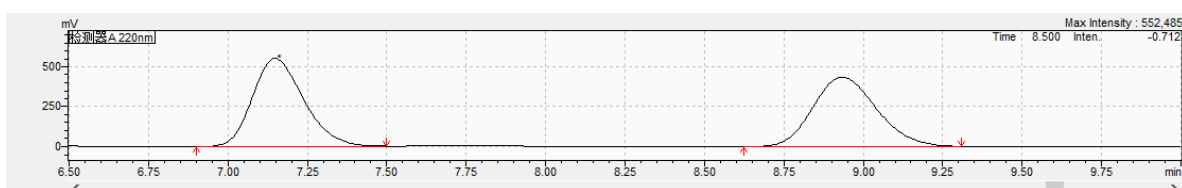

结果视图 - 峰表

| 峰号 | 保留时间  | 面积       | 高度     | 标记 | 浓度      | 浓度单位 | 化合物ID号 | 化合物名 | 面积%     |
|----|-------|----------|--------|----|---------|------|--------|------|---------|
| 1  | 7.148 | 6129407  | 550861 | M  | 50.286  |      |        |      | 50.286  |
| 2  | 8.933 | 6059604  | 436495 | M  | 49.714  |      |        |      | 49.714  |
| 总计 |       | 12189011 | 987356 |    | 100.000 |      |        |      | 100.000 |

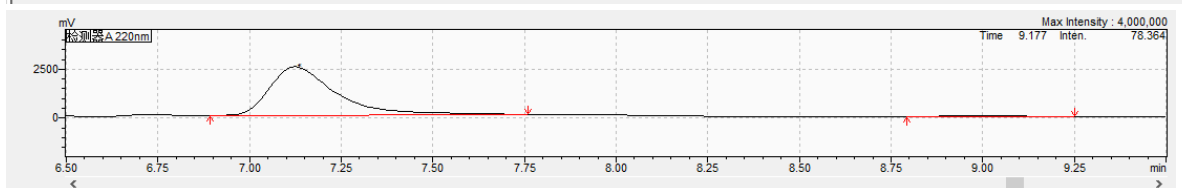

结果视图 - 峰表

| 峰号 | 保留时间  | 面积       | 高度      | 标记 | 浓度      | 浓度单位 | 化合物ID号 | 化合物名 | 面积%     |
|----|-------|----------|---------|----|---------|------|--------|------|---------|
| 1  | 7.123 | 31606926 | 2491701 | M  | 97.222  |      |        |      | 97.222  |
| 2  | 9.001 | 903216   | 73020   | M  | 2.778   |      |        |      | 2.778   |
| 总计 |       | 32510141 | 2564721 |    | 100.000 |      |        |      | 100.000 |

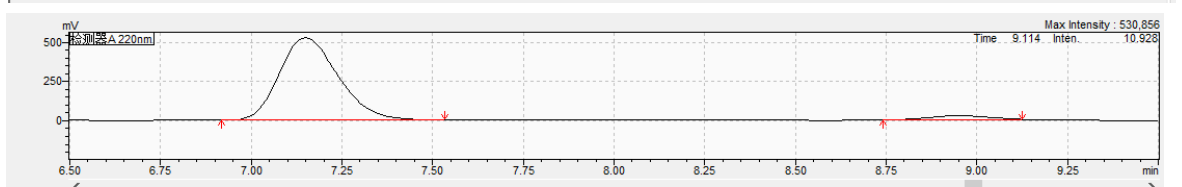

结果视图 - 峰表

| 峰号 | 保留时间  | 面积      | 高度     | 标记 | 浓度      | 浓度单位 | 化合物ID号 | 化合物名 | 面积%     |
|----|-------|---------|--------|----|---------|------|--------|------|---------|
| 1  | 7.149 | 5933564 | 526252 | M  | 95.295  |      |        |      | 95.295  |
| 2  | 8.951 | 292989  | 24931  | M  | 4.705   |      |        |      | 4.705   |
| 总计 |       | 6226552 | 551182 |    | 100.000 |      |        |      | 100.000 |

### 1-cyclohexyl-3-(4-methoxyphenyl)pyrrolidine-2,5-dione (10m)

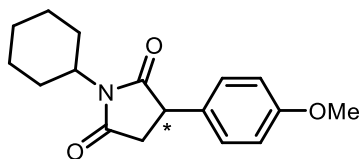

White solid. Yield: 56% yield (**L5**); 72% yield (**L9**).

$^1\text{H}$  NMR (500 MHz,  $\text{CHCl}_3$ )  $\delta$  7.13 – 7.07 (m, 2H), 6.92 – 6.84 (m, 2H), 4.05– 4.02 (m, 1H), 3.88 (dd,  $J_1 = 9.6$  Hz,  $J_2 = 4.5$  Hz, 1H), 3.79 (s, 3H), 3.12 (dd,  $J_1 = 18.4$  Hz,  $J_2 = 9.6$  Hz, 1H), 2.71 (dd,  $J_1 = 18.4$  Hz,  $J_2 = 4.6$  Hz, 1H), 2.26 – 2.09 (m, 2H), 1.82 (m, 2H), 1.63 (m, 3H), 1.34 – 1.21 (m, 3H).

$^{13}\text{C}$  NMR (126 MHz,  $\text{CHCl}_3$ )  $\delta$  178.3, 176.7, 159.3, 129.8, 128.4, 114.7, 55.4, 52.1, 44.9, 37.3, 29.0, 28.8, 26.0, 25.9, 25.1.

HPLC trace: Daicel chiralcel OD-H, hexane/*i*-PrOH = 80/20, 220 nm, 1.1 mL/min.

**L5**:  $t_{\text{R}1} = 8.2$  min (minor),  $t_{\text{R}2} = 10.2$  min (major); ee = 84.3%.

**L9**:  $t_{\text{R}1} = 9.0$  min (major),  $t_{\text{R}2} = 11.2$  min (minor); ee = 84.0%.

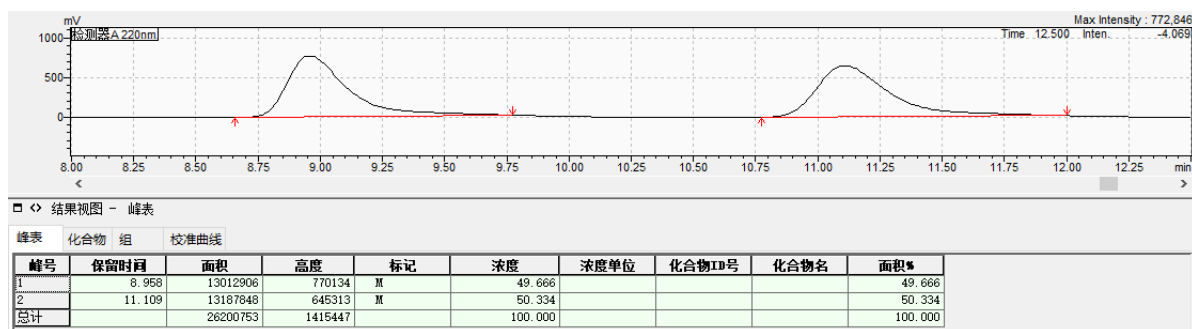

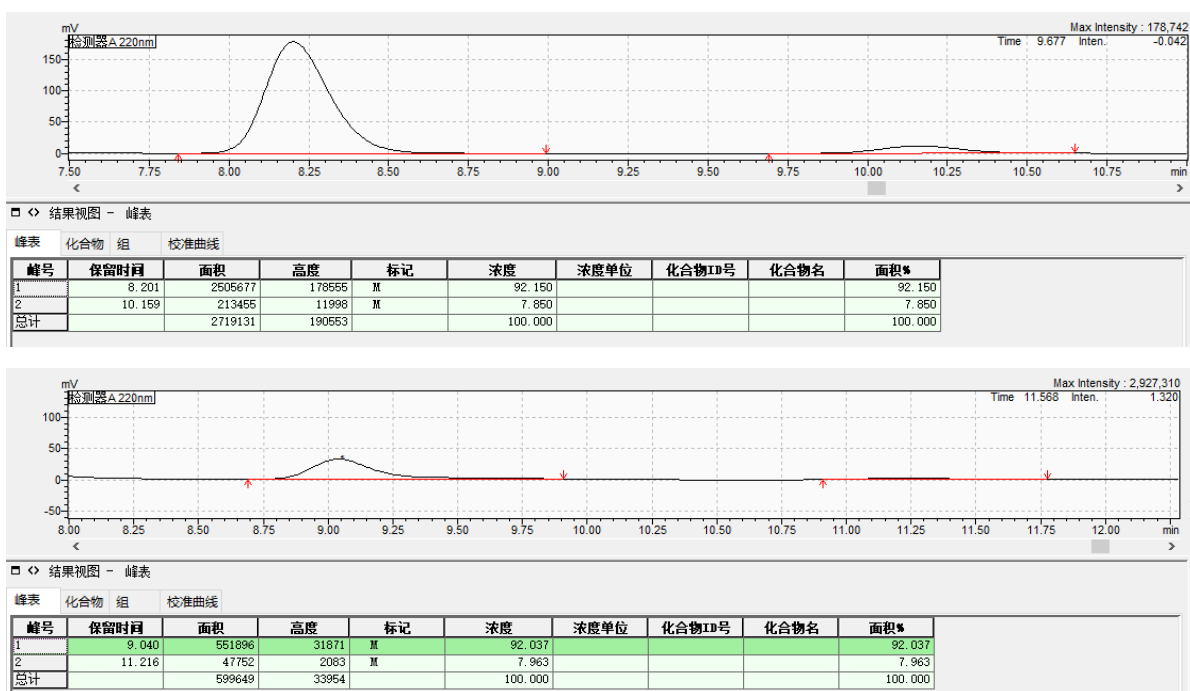

### (R)-1-cyclopentyl-3-(4-methoxyphenyl)pyrrolidine-2,5-dione (10n)

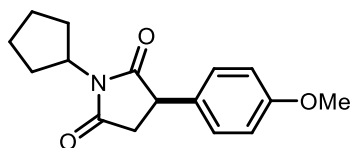

White solid. Yield: 62% yield (**L9**).

$^1\text{H}$  NMR (500 MHz,  $\text{CHCl}_3$ )  $\delta$  7.14 – 7.08 (m, 2H), 6.91 – 6.86 (m, 2H), 4.57–4.50 (m, 1H), 3.88 (dd,  $J_1 = 9.7$  Hz,  $J_2 = 4.6$  Hz, 1H), 3.78 (s, 3H), 3.12 (dd,  $J_1 = 18.3$  Hz,  $J_2 = 9.7$  Hz, 1H), 2.72 (dd,  $J_1 = 18.3$  Hz,  $J_2 = 4.6$  Hz, 1H), 2.01 (m, 2H), 1.93 – 1.79 (m, 4H), 1.64 – 1.51 (m, 2H).

$^{13}\text{C}$  NMR (126 MHz,  $\text{CHCl}_3$ )  $\delta$  178.3, 176.5, 159.3, 129.6, 128.5, 114.7, 55.4, 51.9, 44.9, 37.2, 28.9, 28.8, 25.4.

HPLC trace: Daicel chiralcel OD-H, hexane/*i*-PrOH = 80/20, 220 nm, 1.0 mL/min.

**L9**:  $t_{R1} = 8.8$  min (major),  $t_{R2} = 11.0$  min (minor); ee = 62.4%.

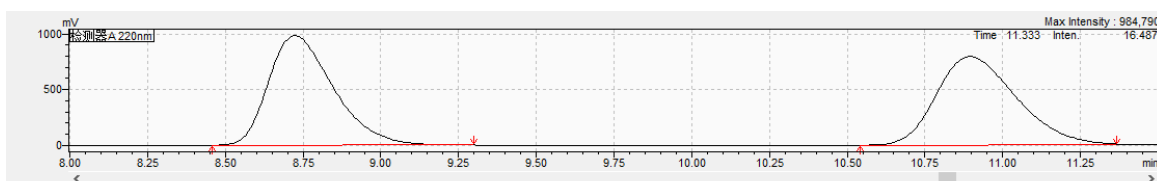

结果视图 - 峰表

| 峰号 | 保留时间   | 面积       | 高度      | 标记 | 浓度      | 浓度单位 | 化合物ID号 | 化合物名 | 面积%     |
|----|--------|----------|---------|----|---------|------|--------|------|---------|
| 1  | 8.723  | 14269665 | 983457  | M  | 50.437  |      |        |      | 50.437  |
| 2  | 10.896 | 14021301 | 791210  | M  | 49.563  |      |        |      | 49.563  |
| 总计 |        | 28289966 | 1774667 |    | 100.000 |      |        |      | 100.000 |

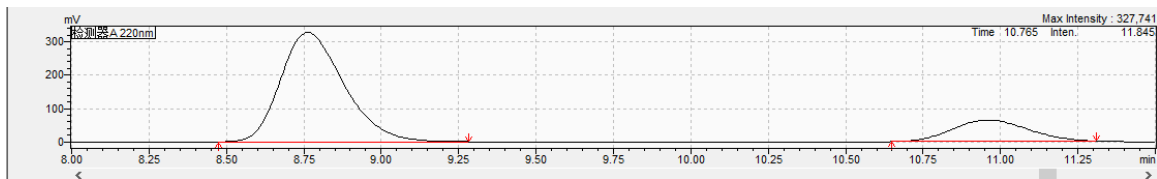

结果视图 - 峰表

| 峰号 | 保留时间   | 面积      | 高度     | 标记 | 浓度      | 浓度单位 | 化合物ID号 | 化合物名 | 面积%     |
|----|--------|---------|--------|----|---------|------|--------|------|---------|
| 1  | 8.762  | 4674727 | 327463 | M  | 81.218  |      |        |      | 81.218  |
| 2  | 10.960 | 1081073 | 64336  | M  | 18.782  |      |        |      | 18.782  |
| 总计 |        | 5755799 | 391799 |    | 100.000 |      |        |      | 100.000 |

### (*R*)-1-cyclopropyl-3-(4-methoxyphenyl)pyrrolidine-2,5-dione (10o)

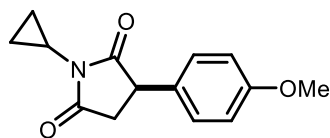

White solid. Yield: 58% yield (**L9**).

$^1\text{H}$  NMR (500 MHz,  $\text{CDCl}_3$ )  $\delta$  7.15 – 7.07 (m, 2H), 6.92 – 6.85 (m, 2H), 3.89 (dd,  $J_1 = 9.6$  Hz,  $J_2 = 4.8$  Hz, 1H), 3.79 (s, 3H), 3.12 (dd,  $J_1 = 18.5$  Hz,  $J_2 = 10.2$  Hz, 1H), 2.73 (dd,  $J_1 = 18.5$  Hz,  $J_2 = 9.8$  Hz, 1H), 2.70 – 2.63 (m, 1H), 1.01 – 0.93 (m, 4H).

$^{13}\text{C}$  NMR (126 MHz,  $\text{CDCl}_3$ )  $\delta$  178.6, 176.8, 159.4, 129.3, 128.5, 114.7, 55.5, 44.8, 37.1, 22.7, 5.04, 5.01.

HPLC trace: Daicel chiralcel OD-H, hexane/*i*-PrOH = 80/20, 220 nm, 1.0 mL/min.

**L9**:  $t_{R1} = 30.3$  min (major),  $t_{R2} = 34.4$  min (minor); ee = 57.8%.



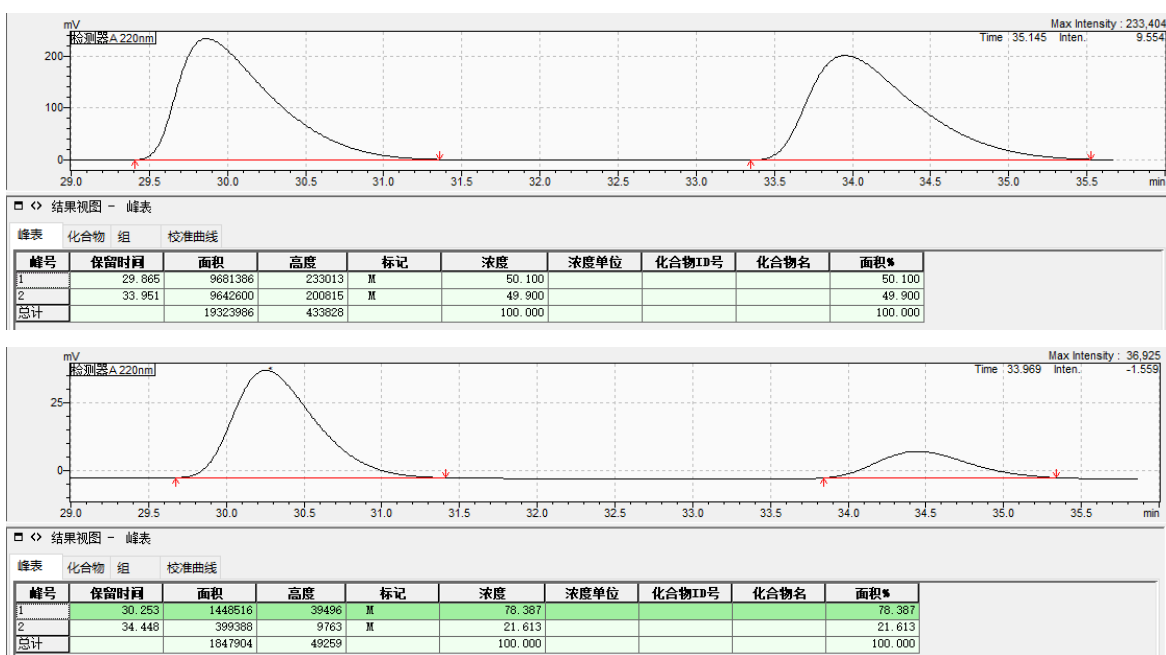

### (S)-3-(4-methoxyphenyl)-1-phenylpyrrolidine-2,5-dione (10p)

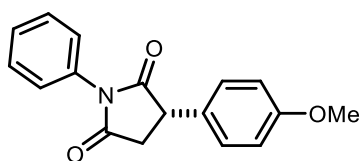

Yellow solid. Yield: 57% yield (**L5**); 64% yield (**L9**).

$^1\text{H}$  NMR (500 MHz,  $\text{CDCl}_3$ ):  $\delta$  7.50-7.46 (m, 2H), 7.42-7.38 (m, 1H), 7.33-7.31 (m, 2H), 7.25-7.21 (m, 2H), 6.94-6.91 (m, 2H), 4.14 (dd,  $J_1 = 9.7$  Hz,  $J_2 = 4.8$  Hz, 1H), 3.81 (s, 3H), 3.35 (dd,  $J_1 = 18.5$  Hz,  $J_2 = 9.8$  Hz, 1H), 2.96 (dd,  $J_1 = 18.6$  Hz,  $J_2 = 4.8$  Hz, 1H).

$^{13}\text{C}$  NMR (125 MHz,  $\text{CDCl}_3$ ):  $\delta$  177.1, 175.4, 159.4, 132.0, 129.3, 129.1, 128.8, 128.6, 126.6, 114.8, 55.5, 45.3, 37.4.

HPLC trace: Daicel chiralcel OD-H, hexane/*i*-PrOH = 80/20, 220 nm, 1.1 mL/min.

**L5**:  $t_{\text{R}1} = 26.4$  min (major),  $t_{\text{R}2} = 31.8$  min (minor); ee = 81.4%.

**L9**:  $t_{\text{R}1} = 25.8$  min (major),  $t_{\text{R}2} = 30.9$  min (minor); ee = 84.4%.

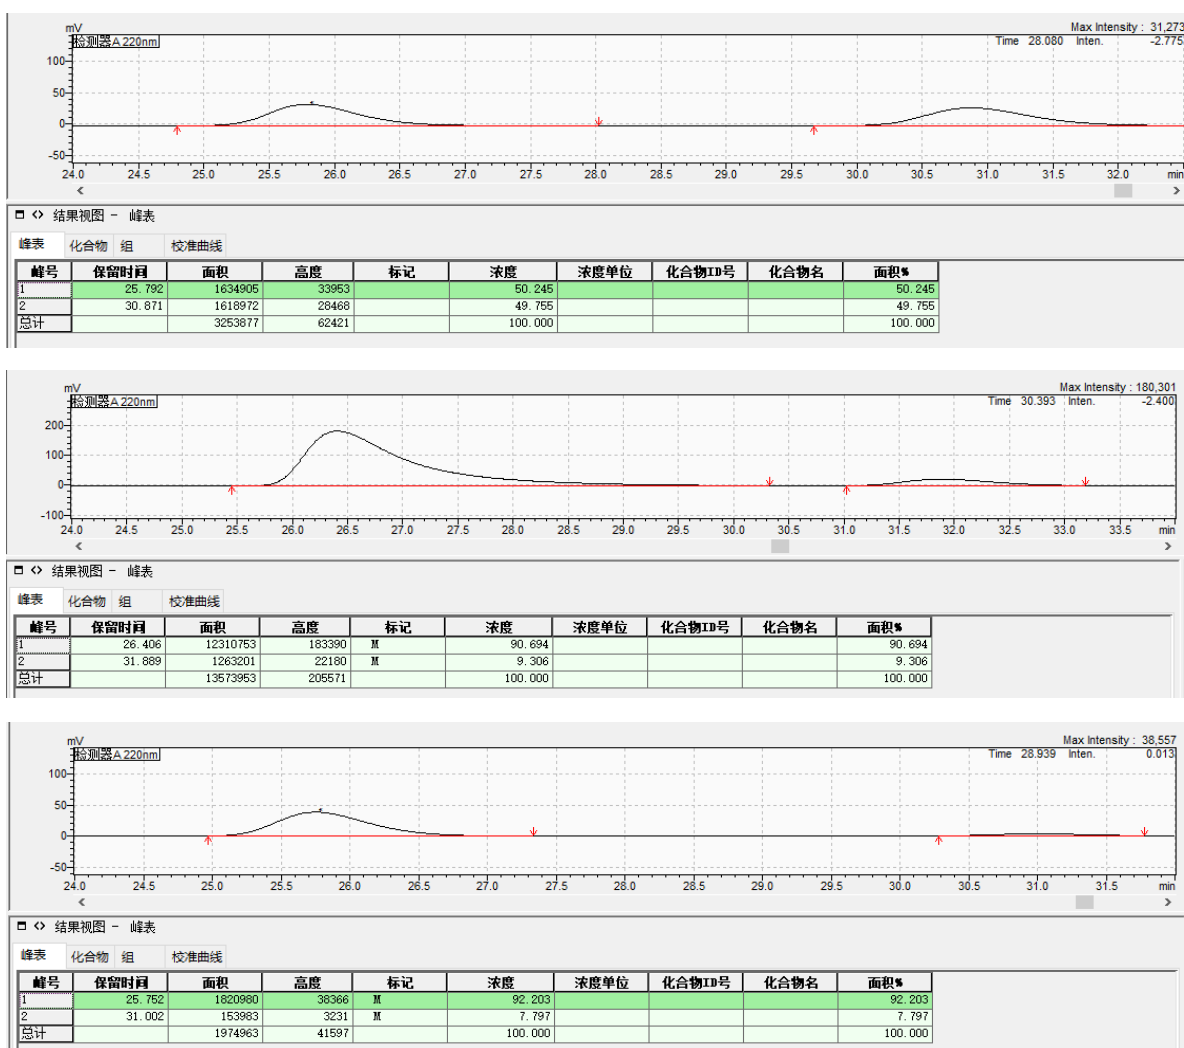

**(S)-1-(2-(tert-butyl)phenyl)-3-(4-methoxyphenyl)pyrrolidine-2,5-dione (10q)**

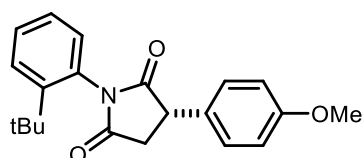

White solid. Yield: 37% yield (**L5**); 48% yield (**L9**).

$^1\text{H}$  NMR (400 MHz,  $\text{CHCl}_3$ )  $\delta$  7.58 (dd,  $J_1 = 8.2$  Hz,  $J_2 = 1.5$  Hz, 1H), 7.44 – 7.33 (m, 1H), 7.31 – 7.19 (m, 3H), 6.98 – 6.88 (m, 2H), 6.84 (dd,  $J_1 = 7.7$  Hz,  $J_2 = 1.5$  Hz, 1H), 4.13 (dd,  $J_1 = 9.8$  Hz,  $J_2 = 4.6$  Hz, 1H), 3.80 (s, 3H), 3.35 (dd,  $J_1 = 18.8$  Hz,  $J_2 = 9.6$  Hz, 1H), 2.96 (dd,  $J_1 = 18.6$  Hz,  $J_2 = 4.6$  Hz, 1H), 1.33 (s, 9H).

$^{13}\text{C}$  NMR (101 MHz,  $\text{CHCl}_3$ )  $\delta$  178.2, 176.7, 159.5, 148.2, 130.9, 130.5, 129.9, 129.2, 129.1, 128.7, 127.6, 114.8, 55.5, 45.7, 37.9, 35.8, 31.8.

HPLC trace: Daicel chiralcel OD-H, hexane/*i*-PrOH = 90/10, 220 nm, 1.0 mL/min.

**L5:**  $t_{\text{R}1}$  = 17.9 min (major),  $t_{\text{R}2}$  = 31.9 min (minor); ee = 74.4%.

**L9:**  $t_{\text{R}1}$  = 16.3 min (major),  $t_{\text{R}2}$  = 28.1 min (minor); ee = 75.8%.

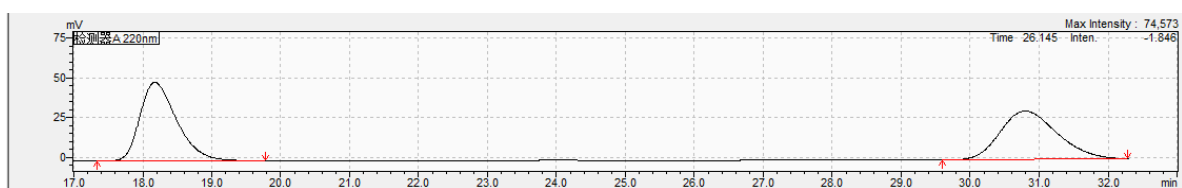

结果视图 - 峰表

| 峰号 | 保留时间   | 面积      | 高度    | 标记 | 浓度      | 浓度单位 | 化合物ID号 | 化合物名 | 面积%     |
|----|--------|---------|-------|----|---------|------|--------|------|---------|
| 1  | 18.174 | 1832305 | 49471 | V  | 50.907  |      |        |      | 50.907  |
| 2  | 30.798 | 1766987 | 30497 |    | 49.093  |      |        |      | 49.093  |
| 总计 |        | 3599293 | 79968 |    | 100.000 |      |        |      | 100.000 |

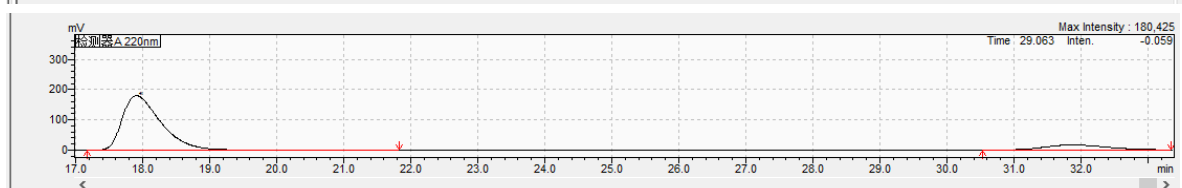

结果视图 - 峰表

| 峰号 | 保留时间   | 面积      | 高度     | 标记 | 浓度      | 浓度单位 | 化合物ID号 | 化合物名 | 面积%     |
|----|--------|---------|--------|----|---------|------|--------|------|---------|
| 1  | 17.906 | 7203962 | 180637 | S  | 87.191  |      |        |      | 87.191  |
| 2  | 31.871 | 1058326 | 16522  |    | 12.809  |      |        |      | 12.809  |
| 总计 |        | 8262288 | 197159 |    | 100.000 |      |        |      | 100.000 |

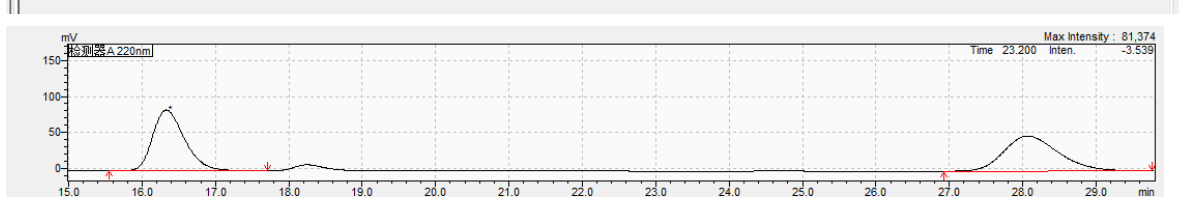

结果视图 - 峰表

| 峰号 | 保留时间   | 面积      | 高度     | 标记 | 浓度      | 浓度单位 | 化合物ID号 | 化合物名 | 面积%     |
|----|--------|---------|--------|----|---------|------|--------|------|---------|
| 1  | 16.331 | 2549866 | 84452  |    | 50.415  |      |        |      | 50.415  |
| 2  | 28.070 | 2507911 | 48485  |    | 49.585  |      |        |      | 49.585  |
| 总计 |        | 5057777 | 132937 |    | 100.000 |      |        |      | 100.000 |

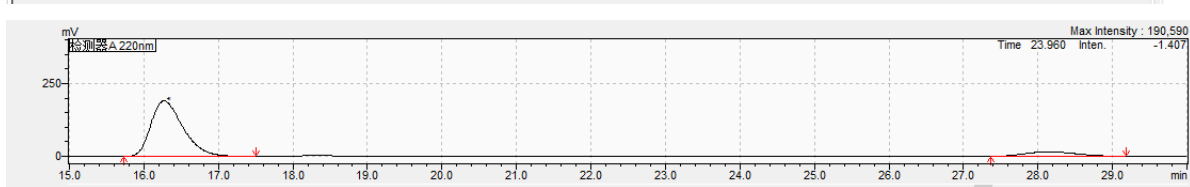

结果视图 - 峰表

| 峰号 | 保留时间   | 面积      | 高度     | 标记 | 浓度      | 浓度单位 | 化合物ID号 | 化合物名 | 面积%     |
|----|--------|---------|--------|----|---------|------|--------|------|---------|
| 1  | 16.269 | 5712206 | 191083 | M  | 87.932  |      |        |      | 87.932  |
| 2  | 28.140 | 783963  | 15908  | M  | 12.068  |      |        |      | 12.068  |
| 总计 |        | 6496169 | 206992 |    | 100.000 |      |        |      | 100.000 |

**(S)-3-(4-methoxyphenyl)pyrrolidine-2,5-dione (10r)**

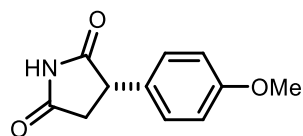

White solid. Yield: 56% yield (**L5**); 44% yield (**L9**).

$^1\text{H}$  NMR (500 MHz,  $\text{CDCl}_3$ )  $\delta$  8.67 (s, 1H), 7.21 – 7.10 (m, 2H), 6.98 – 6.80 (m, 2H), 4.04 (dd,  $J_1 = 9.7$  Hz,  $J_2 = 5.1$  Hz, 1H), 3.80 (s, 3H), 3.23 (dd,  $J_1 = 18.6$  Hz,  $J_2 = 9.6$  Hz, 1H), 2.85 (dd,  $J_1 = 18.6$  Hz,  $J_2 = 5.1$  Hz, 1H).

$^{13}\text{C}$  NMR (126 MHz,  $\text{CDCl}_3$ )  $\delta$  178.6, 176.6, 159.4, 128.7, 128.6, 114.7, 55.5, 46.7, 38.4.

HPLC trace: Daicel chiralcel OD-H, hexane/*i*-PrOH = 90/10, 220 nm, 1.1 mL/min.

**L5**:  $t_{\text{R}1} = 46.9$  min (major),  $t_{\text{R}2} = 58.0$  min (minor); ee = 87.0%.

**L9**:  $t_{\text{R}1} = 48.0$  min (minor),  $t_{\text{R}2} = 51.2$  min (major); ee = 73.4%.

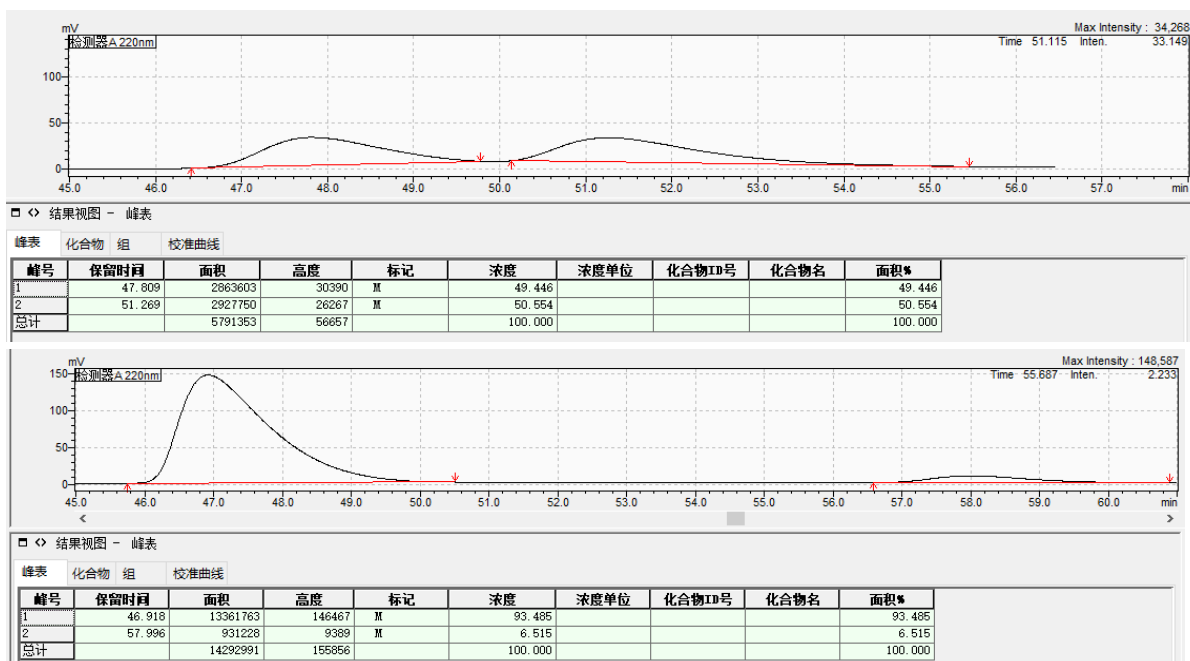

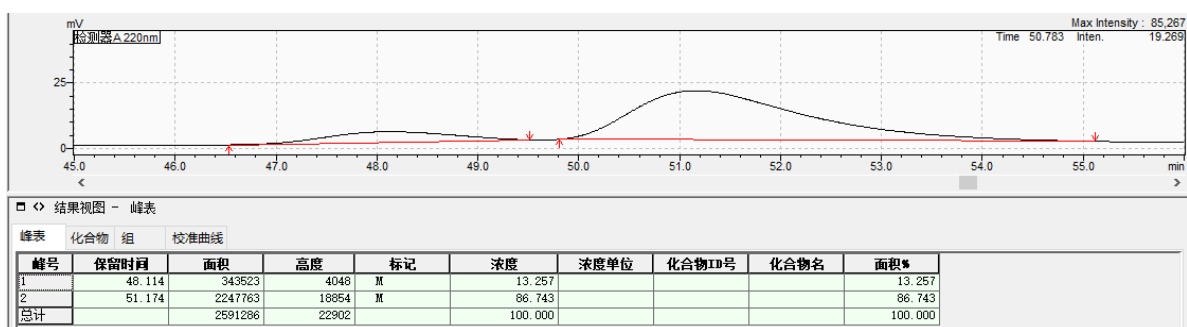

**(S)-1-benzyl-3-(4-(benzyloxy)phenyl)pyrrolidine-2,5-dione (11b)**

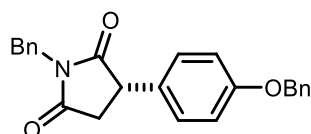

White solid. Yield: 63% yield (**L5**); 56% yield (**L9**).

$^1\text{H}$  NMR (500 MHz,  $\text{CDCl}_3$ )  $\delta$  7.39 – 7.34 (m, 2H), 7.32 – 7.22 (m, 6H), 7.14 – 7.09 (m, 2H), 4.76 – 4.60 (m, 2H), 3.97 (dd,  $J_1 = 9.6$  Hz,  $J_2 = 4.7$  Hz, 1H), 3.15 (dd,  $J_1 = 18.5$  Hz,  $J_2 = 9.7$  Hz, 1H), 2.77 (dd,  $J_1 = 18.0$  Hz,  $J_2 = 4.8$  Hz, 1H).

$^{13}\text{C}$  NMR (126 MHz,  $\text{CDCl}_3$ )  $\delta$  177.6, 175.9, 137.3, 135.9, 129.3, 128.9, 128.8, 128.2, 128.1, 127.5, 45.9, 42.8, 37.3.

HPLC trace: Daicel chiralcel OD-H, hexane/*i*-PrOH = 70/30, 220 nm, 1.1 mL/min.

**L5**:  $t_{R1} = 30.8$  min (minor),  $t_{R2} = 37.2$  min (major); ee = 75.0%.

**L9**:  $t_{R1} = 30.7$  min (minor),  $t_{R2} = 37.1$  min (major); ee = 66.6%.

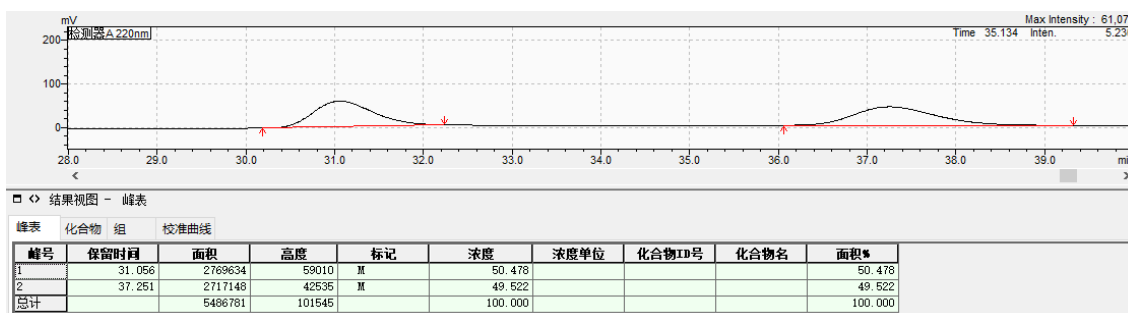

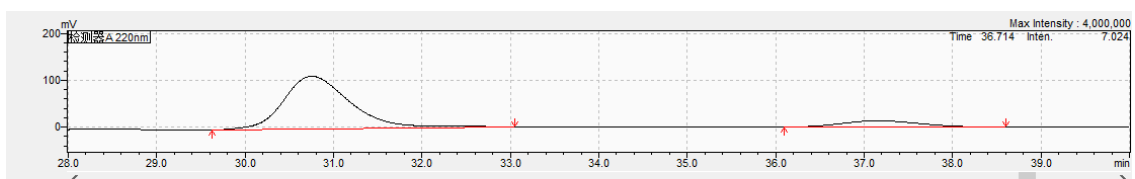

结果视图 - 峰表

| 峰号 | 保留时间   | 面积      | 高度     | 标记 | 浓度      | 浓度单位 | 化合物ID号 | 化合物名 | 面积%     |
|----|--------|---------|--------|----|---------|------|--------|------|---------|
| 1  | 30.752 | 5933338 | 112987 | M  | 87.538  |      |        |      | 87.538  |
| 2  | 37.154 | 844662  | 13611  | M  | 12.462  |      |        |      | 12.462  |
| 总计 |        | 6778000 | 126598 |    | 100.000 |      |        |      | 100.000 |

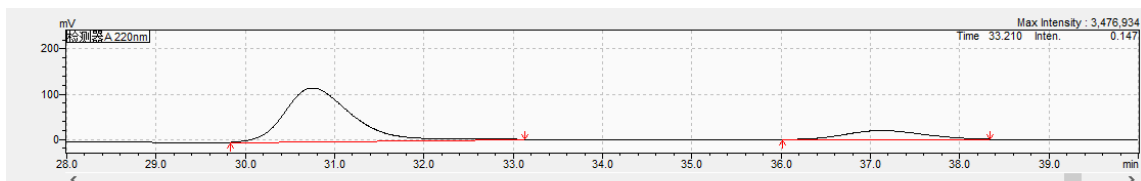

结果视图 - 峰表

| 峰号 | 保留时间   | 面积      | 高度     | 标记 | 浓度      | 浓度单位 | 化合物ID号 | 化合物名 | 面积%     |
|----|--------|---------|--------|----|---------|------|--------|------|---------|
| 1  | 30.753 | 6148309 | 118383 | M  | 83.816  |      |        |      | 83.816  |
| 2  | 37.127 | 1187190 | 19576  | M  | 16.184  |      |        |      | 16.184  |
| 总计 |        | 7335499 | 137959 |    | 100.000 |      |        |      | 100.000 |

### (R)-1-benzyl-3-phenylpyrrolidine-2,5-dione (11c)

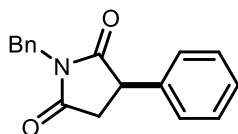

White solid. Yield: 68% yield (**L5**); 61% yield (**L9**).

$^1\text{H}$  NMR (500 MHz,  $\text{CDCl}_3$ ):  $\delta$  7.41-7.39 (m, 2H), 7.36-7.28 (m, 6H), 7.16-7.14 (m, 2H), 4.71 (dd,  $J_1 = 29.6$  Hz,  $J_2 = 14.2$  Hz, 2H), 4.01 (dd,  $J_1 = 9.8$  Hz,  $J_2 = 4.8$  Hz, 1H), 3.20 (dd,  $J_1 = 18.3$  Hz,  $J_2 = 9.7$  Hz, 1H), 2.82 (dd,  $J_1 = 18.3$  Hz,  $J_2 = 4.8$  Hz, 1H).

$^{13}\text{C}$  NMR (126 MHz,  $\text{CDCl}_3$ ):  $\delta$  177.6, 175.9, 137.3, 135.8, 129.3, 129.1, 128.9, 128.8, 128.2, 128.1, 127.5, 46.0, 42.8, 37.3.

HPLC trace: Daicel chiralcel OD-H, hexane/*i*-PrOH = 80/20, 220 nm, 1.1 mL/min.

**L5**:  $t_{R1} = 12.2$  min (minor),  $t_{R2} = 15.1$  min (major); ee = 64.6%.

**L9**:  $t_{R1} = 12.3$  min (minor),  $t_{R2} = 15.3$  min (major); ee = 45.2%.

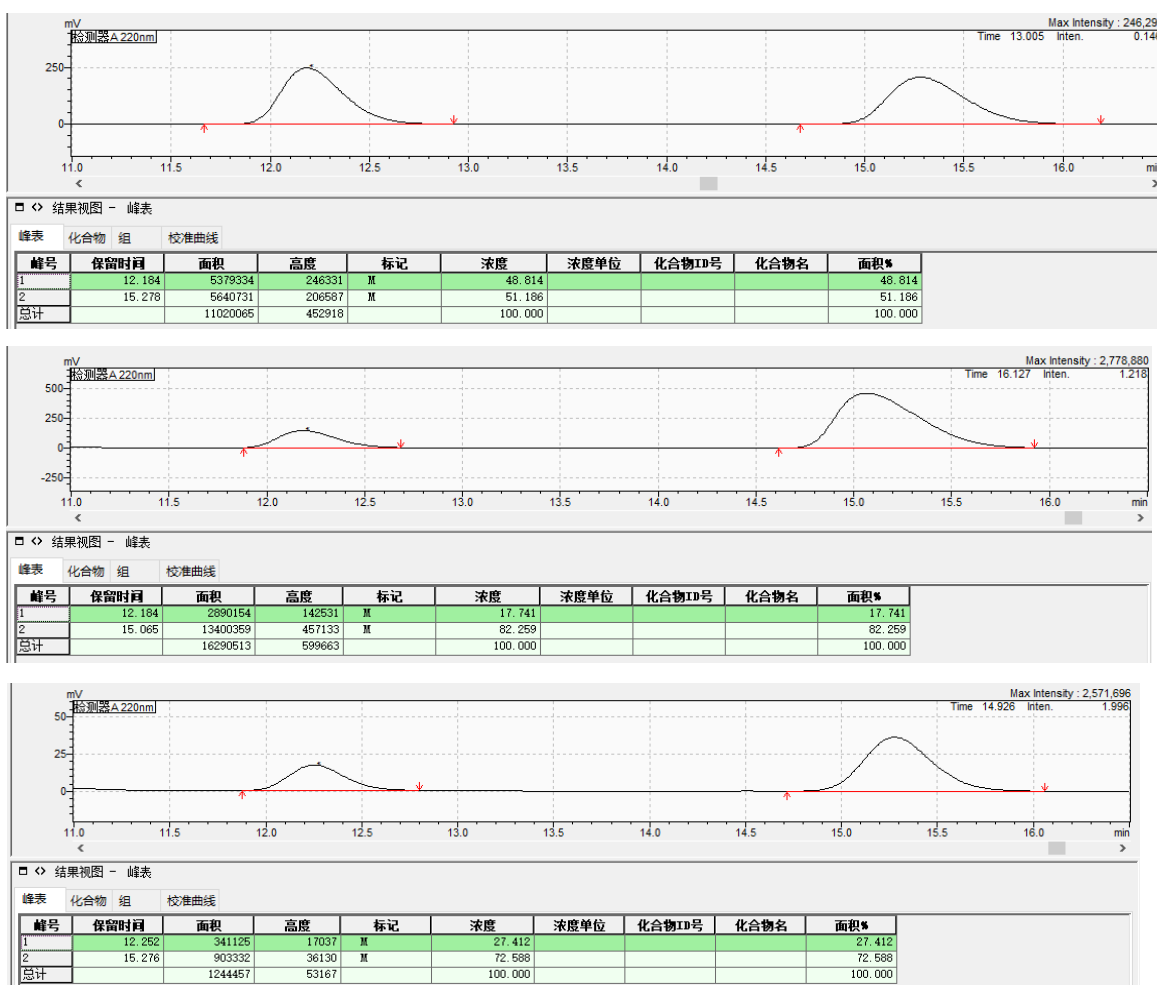

### (*R*)-1-benzyl-3-(*p*-tolyl)pyrrolidine-2,5-dione (11d)

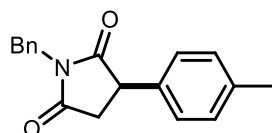

White solid. Yield: 57% yield (**L5**); 48% yield (**L9**).

$^1\text{H}$  NMR (500 MHz,  $\text{CDCl}_3$ ):  $\delta$  7.41-7.39 (m, 2H), 7.34-7.29 (m, 3H), 7.14 (d,  $J = 8.0$  Hz, 2H), 7.04 (d,  $J = 8.4$  Hz, 2H), 4.73 (dd,  $J_1 = 29.8$  Hz,  $J_2 = 14.0$  Hz, 2H), 3.98 (dd,  $J_1 = 9.6$  Hz,  $J_2 = 4.6$  Hz, 1H), 3.19 (dd,  $J_1 = 18.5$  Hz,  $J_2 = 9.3$  Hz, 1H), 2.80 (dd,  $J_1 = 18.7$  Hz,  $J_2 = 5.0$  Hz, 1H).

$^{13}\text{C}$  NMR (126 MHz,  $\text{CDCl}_3$ ):  $\delta$  177.8, 176.1, 137.9, 135.9, 134.2, 130.0, 128.9, 128.8, 128.1,

127.3, 45.6, 42.8, 37.3, 21.2.

HPLC trace: Daicel chiralcel OD-H, hexane/*i*-PrOH = 80/20, 220 nm, 1.1 mL/min.

**L5:**  $t_{R1}$  = 11.9 min (minor),  $t_{R2}$  = 12.8 min (major); ee = 84.0%.

**L9:**  $t_{R1}$  = 11.9 min (minor),  $t_{R2}$  = 12.8 min (major); ee = 56.8%.

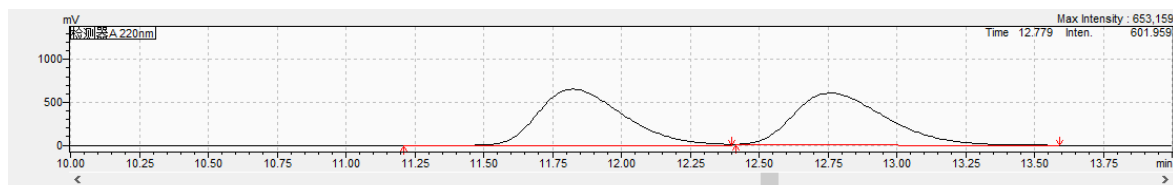

结果视图 - 峰表

| 峰号 | 保留时间   | 面积       | 高度      | 标记 | 浓度      | 浓度单位 | 化合物ID号 | 化合物名 | 面积%     |
|----|--------|----------|---------|----|---------|------|--------|------|---------|
| 1  | 11.823 | 14073175 | 653437  |    | 50.648  |      |        |      | 50.648  |
| 2  | 12.758 | 13712972 | 597999  | M  | 49.352  |      |        |      | 49.352  |
| 总计 |        | 27786147 | 1251435 |    | 100.000 |      |        |      | 100.000 |

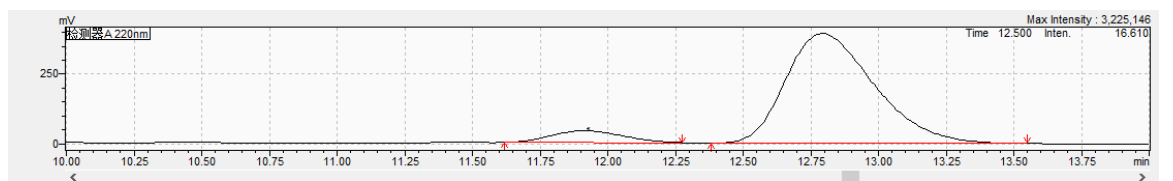

结果视图 - 峰表

| 峰号 | 保留时间   | 面积      | 高度     | 标记 | 浓度      | 浓度单位 | 化合物ID号 | 化合物名 | 面积%     |
|----|--------|---------|--------|----|---------|------|--------|------|---------|
| 1  | 11.913 | 772531  | 41986  | M  | 7.943   |      |        |      | 7.943   |
| 2  | 12.793 | 8953405 | 393673 | M  | 92.057  |      |        |      | 92.057  |
| 总计 |        | 9725935 | 435659 |    | 100.000 |      |        |      | 100.000 |

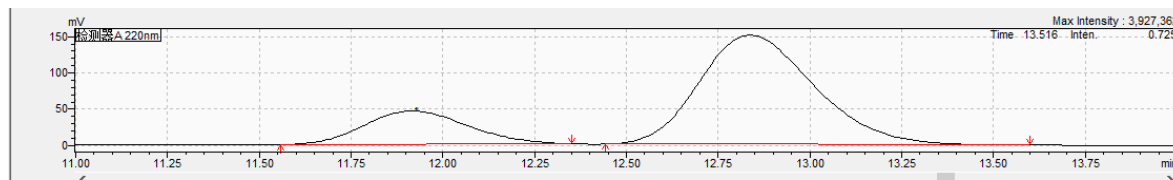

结果视图 - 峰表

| 峰号 | 保留时间   | 面积      | 高度     | 标记 | 浓度      | 浓度单位 | 化合物ID号 | 化合物名 | 面积%     |
|----|--------|---------|--------|----|---------|------|--------|------|---------|
| 1  | 11.916 | 905429  | 46058  | M  | 21.587  |      |        |      | 21.587  |
| 2  | 12.636 | 3288862 | 150782 | M  | 78.413  |      |        |      | 78.413  |
| 总计 |        | 4194291 | 196840 |    | 100.000 |      |        |      | 100.000 |

**(R)-1-benzyl-3-(4-(tert-butyl)phenyl)pyrrolidine-2,5-dione (11e)**

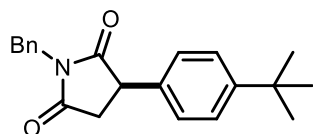

White solid. Yield: 54% yield (**L5**); 46% yield (**L9**).



$^1\text{H}$  NMR (500 MHz,  $\text{CDCl}_3$ )  $\delta$  7.43 – 7.38 (m, 2H), 7.38 – 7.28 (m, 5H), 7.12 – 7.07 (m, 2H), 4.89 – 4.60 (m, 2H), 4.00 (dd,  $J_1 = 9.5$  Hz,  $J_2 = 4.8$  Hz, 1H), 3.18 (dd,  $J_1 = 18.6$  Hz,  $J_2 = 9.5$  Hz, 1H), 2.82 (dd,  $J_1 = 18.6$  Hz,  $J_2 = 4.7$  Hz, 1H), 1.30 (s, 9H).

$^{13}\text{C}$  NMR (126 MHz,  $\text{CDCl}_3$ )  $\delta$  177.8, 176.1, 151.0, 135.9, 134.1, 128.9, 128.8, 128.1, 127.1, 126.3, 45.6, 42.8, 37.3, 34.7, 31.4.

HPLC trace: Daicel chiralcel OD-H, hexane/*i*-PrOH = 80/20, 220 nm, 1.1 mL/min.

**L5:**  $t_{\text{R}1} = 9.6$  min (minor),  $t_{\text{R}2} = 11.4$  min (major); ee = 75.2%.

**L9:**  $t_{\text{R}1} = 9.6$  min (minor),  $t_{\text{R}2} = 11.4$  min (major); ee = 46.6%.

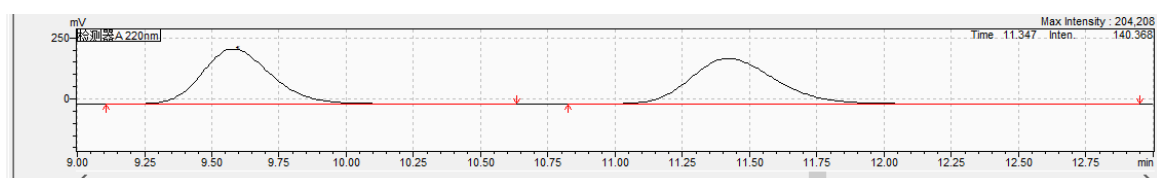

结果视图 - 峰表

| 峰号 | 保留时间   | 面积      | 高度     | 标记 | 浓度      | 浓度单位 | 化合物ID号 | 化合物名 | 面积%     |
|----|--------|---------|--------|----|---------|------|--------|------|---------|
| 1  | 9.580  | 3999179 | 224448 |    | 49.601  |      |        |      | 49.601  |
| 2  | 11.421 | 4063552 | 185600 |    | 50.399  |      |        |      | 50.399  |
| 总计 |        | 8062730 | 410048 |    | 100.000 |      |        |      | 100.000 |

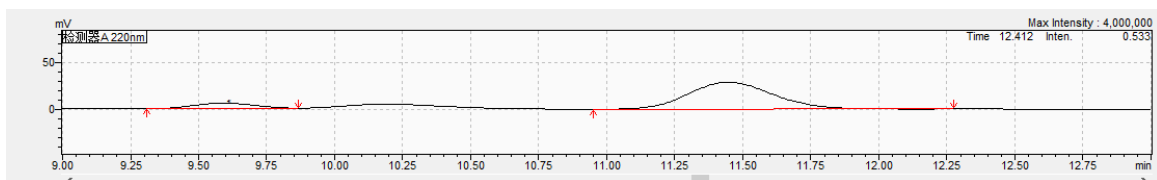

结果视图 - 峰表

| 峰号 | 保留时间   | 面积     | 高度    | 标记 | 浓度      | 浓度单位 | 化合物ID号 | 化合物名 | 面积%     |
|----|--------|--------|-------|----|---------|------|--------|------|---------|
| 1  | 9.595  | 87965  | 5747  | M  | 12.428  |      |        |      | 12.428  |
| 2  | 11.445 | 619631 | 26845 | M  | 87.572  |      |        |      | 87.572  |
| 总计 |        | 707796 | 34592 |    | 100.000 |      |        |      | 100.000 |

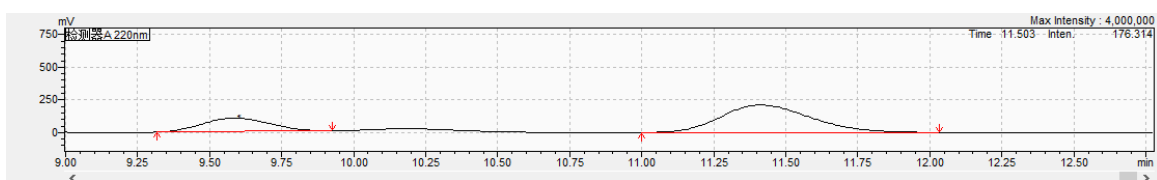

结果视图 - 峰表

| 峰号 | 保留时间   | 面积      | 高度     | 标记 | 浓度      | 浓度单位 | 化合物ID号 | 化合物名 | 面积%     |
|----|--------|---------|--------|----|---------|------|--------|------|---------|
| 1  | 9.586  | 1680507 | 103146 | M  | 26.746  |      |        |      | 26.746  |
| 2  | 11.414 | 4547839 | 209964 | M  | 73.254  |      |        |      | 73.254  |
| 总计 |        | 6208346 | 313110 |    | 100.000 |      |        |      | 100.000 |

(S)-3-([1,1'-biphenyl]-4-yl)-1-benzylpyrrolidine-2,5-dione (11f)

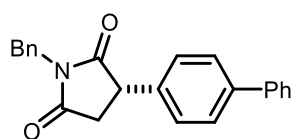

White solid. Yield: 78% yield (**L5**); 82% yield (**L9**).

$^1\text{H}$  NMR (400 MHz,  $\text{CDCl}_3$ )  $\delta$  7.62 – 7.52 (m, 4H), 7.50 – 7.39 (m, 4H), 7.39 – 7.27 (m, 4H), 7.26 – 7.22 (m, 2H), 4.86 – 4.65 (m, 2H), 4.07 (dd,  $J_1 = 9.5$  Hz,  $J_2 = 4.8$  Hz, 1H), 3.24 (dd,  $J_1 = 18.5$  Hz,  $J_2 = 9.6$  Hz, 1H), 2.87 (dd,  $J_1 = 18.5$  Hz,  $J_2 = 4.8$  Hz, 1H).

$^{13}\text{C}$  NMR (101 MHz,  $\text{CDCl}_3$ )  $\delta$  177.6, 175.9, 141.1, 140.5, 136.2, 135.9, 129.0, 128.9, 128.9, 128.2, 128.1, 127.9, 127.7, 127.2, 45.7, 42.9, 37.3.

HPLC trace: Daicel chiralcel OD-H, hexane/*i*-PrOH = 80/20, 220 nm, 1.1 mL/min.

**L5**:  $t_{R1} = 21.2$  min (major),  $t_{R2} = 30.5$  min (minor); ee = 54.0%.

**L9**:  $t_{R1} = 21.2$  min (major),  $t_{R2} = 30.5$  min (minor); ee = 61.4%.

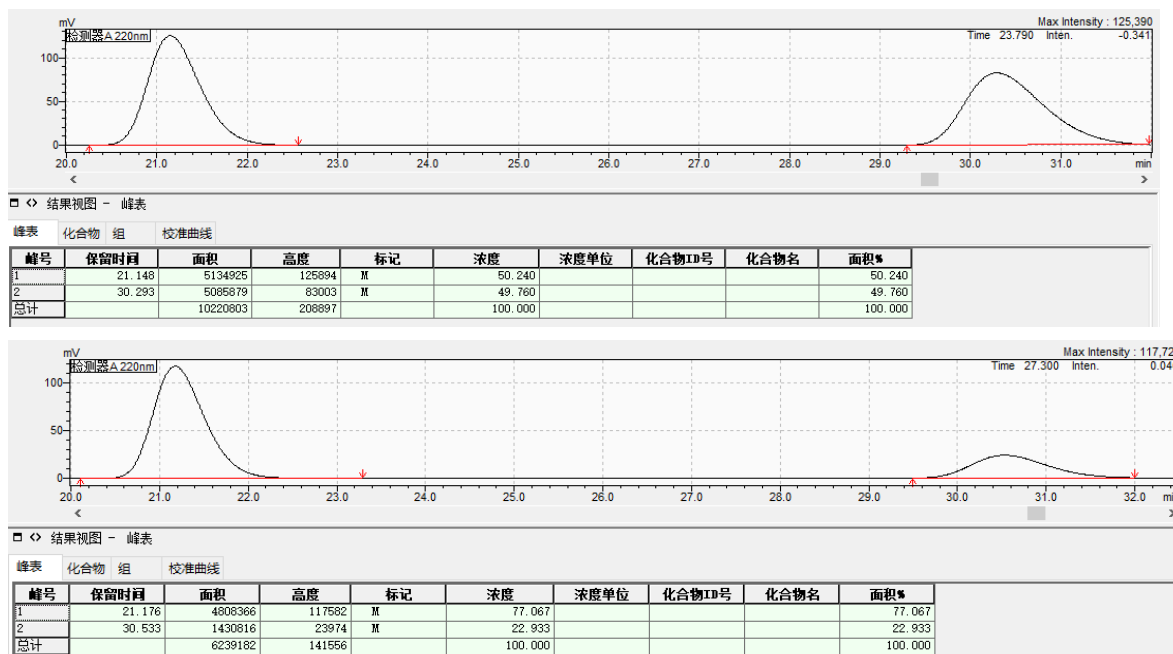

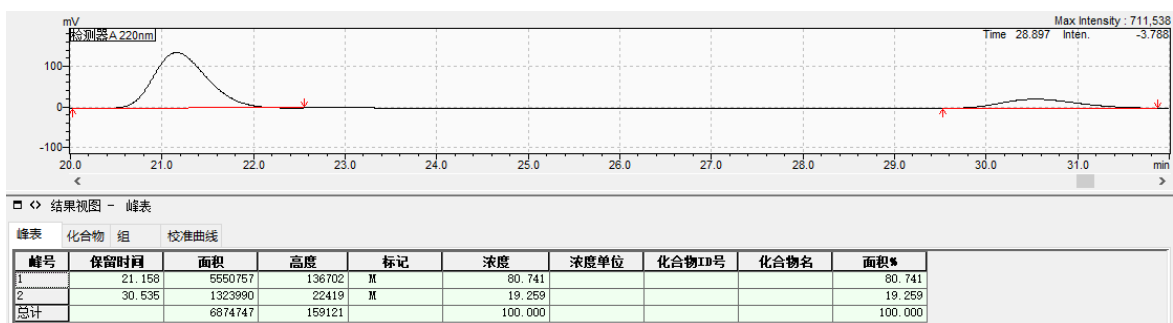

**(R)-1-benzyl-3-(4-fluorophenyl)pyrrolidine-2,5-dione (11g)**

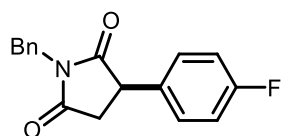

White solid. Yield: 49% yield (**L9**).

$^1\text{H}$  NMR (400 MHz,  $\text{CDCl}_3$ )  $\delta$  7.47 – 7.37 (m, 2H), 7.37 – 7.27 (m, 3H), 7.18 – 7.09 (m, 2H), 7.08 – 6.98 (m, 2H), 4.80 – 4.62 (m, 2H), 4.01 (dd,  $J_1 = 9.6$  Hz,  $J_2 = 4.9$  Hz, 1H), 3.20 (dd,  $J_1 = 18.5$  Hz,  $J_2 = 9.6$  Hz, 1H), 2.78 (dd,  $J_1 = 18.5$  Hz,  $J_2 = 4.8$  Hz, 1H).

$^{13}\text{C}$  NMR (101 MHz,  $\text{CDCl}_3$ )  $\delta$  177.4, 175.6, 162.5 (d,  $J = 63.7$  Hz), 135.8, 132.9 (d,  $J = 3.4$  Hz), 129.1 (d,  $J = 8.2$  Hz), 128.9, 128.8, 128.2, 116.3 (d,  $J = 15.7$  Hz), 45.2, 42.9, 37.2.

HPLC trace: Daicel chiralcel OD-H, hexane/*i*-PrOH = 80/20, 220 nm, 1.1 mL/min.

**L9**:  $t_{R1} = 13.4$  min (minor),  $t_{R2} = 14.7$  min (major); ee = 44.8%.

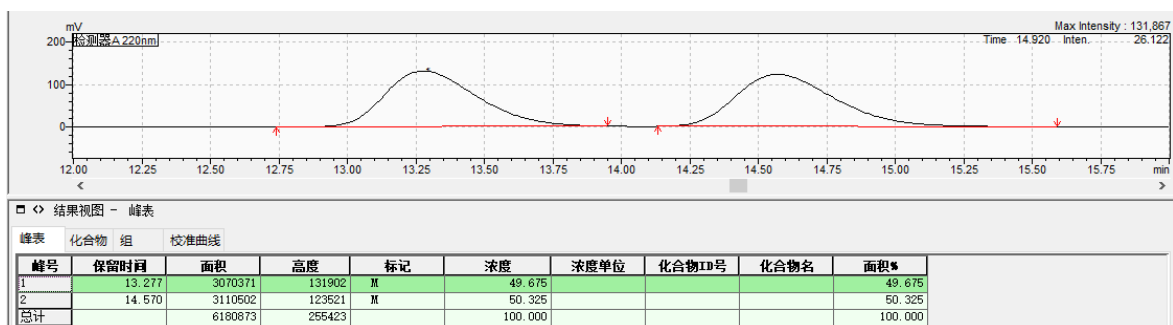

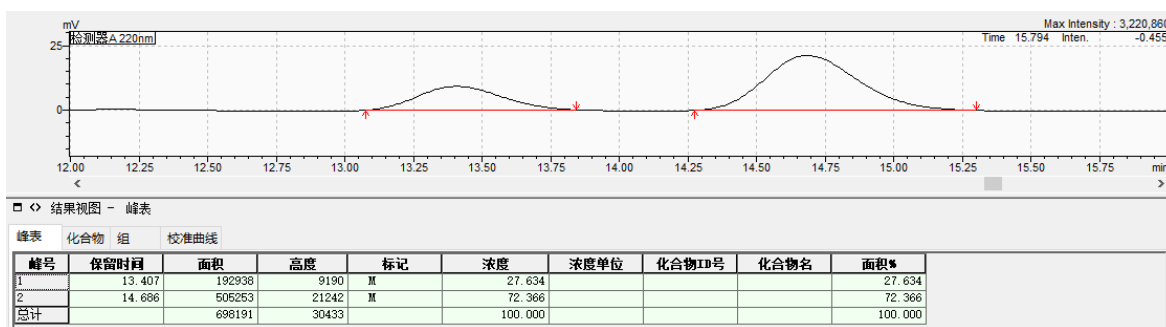

**(R)-1-benzyl-3-(4-(trifluoromethyl)phenyl)pyrrolidine-2,5-dione (11h)**

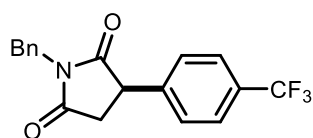

White solid. Yield: 46% yield (**L5**); 37% yield (**L9**)

$^1\text{H}$  NMR (500 MHz,  $\text{CDCl}_3$ )  $\delta$  7.61 – 7.53 (m, 2H), 7.36 (dd,  $J_1 = 7.9$  Hz,  $J_2 = 1.7$  Hz, 2H), 7.33 – 7.23 (m, 5H), 4.75 – 4.62 (m, 2H), 4.05 (dd,  $J_1 = 9.6$  Hz,  $J_2 = 4.9$  Hz, 1H), 3.20 (dd,  $J_1 = 18.5$  Hz,  $J_2 = 9.6$  Hz, 1H), 2.77 (dd,  $J_1 = 18.5$  Hz,  $J_2 = 4.9$  Hz, 1H).

$^{13}\text{C}$  NMR (126 MHz,  $\text{CDCl}_3$ )  $\delta$  176.7, 175.3, 141.1, 135.7, 130.4 (d,  $J = 251.2$  Hz), 128.9 (d,  $J = 115.0$  Hz), 128.32, 128.01, 126.3 (dd,  $J_1 = 77.1$  Hz,  $J_2 = 38.6$  Hz), 125.0, 122.9, 45.7, 43.0, 36.9.

HPLC trace: Daicel chiralcel OD-H, hexane/*i*-PrOH = 80/20, 220 nm, 1.1 mL/min.

**L5**:  $t_{R1} = 15.8$  min (major),  $t_{R2} = 18.2$  min (minor); ee = 46.4%.

**L9**:  $t_{R1} = 15.7$  min,  $t_{R2} = 18.2$  min; ee = 0.

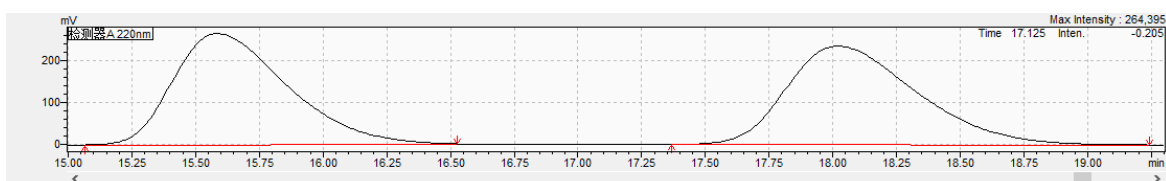

结果视图 - 峰表

| 峰号 | 保留时间   | 面积       | 高度     | 标记 | 浓度      | 浓度单位 | 化合物ID号 | 化合物名 | 面积%     |
|----|--------|----------|--------|----|---------|------|--------|------|---------|
| 1  | 15.587 | 8177620  | 263822 | M  | 49.654  |      |        |      | 49.654  |
| 2  | 18.021 | 8291683  | 234164 | M  | 50.346  |      |        |      | 50.346  |
| 总计 |        | 16469303 | 497986 |    | 100.000 |      |        |      | 100.000 |

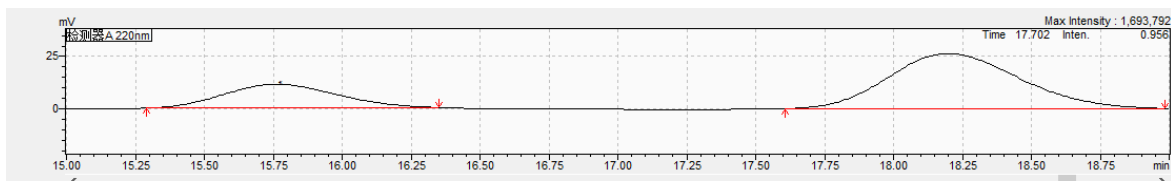

结果视图 - 峰表

| 峰号 | 保留时间   | 面积      | 高度    | 标记 | 浓度      | 浓度单位 | 化合物ID号 | 化合物名 | 面积%     |
|----|--------|---------|-------|----|---------|------|--------|------|---------|
| 1  | 15.761 | 316639  | 11202 | M  | 26.829  |      |        |      | 26.829  |
| 2  | 18.199 | 863571  | 26204 | M  | 73.171  |      |        |      | 73.171  |
| 总计 |        | 1180210 | 37406 |    | 100.000 |      |        |      | 100.000 |

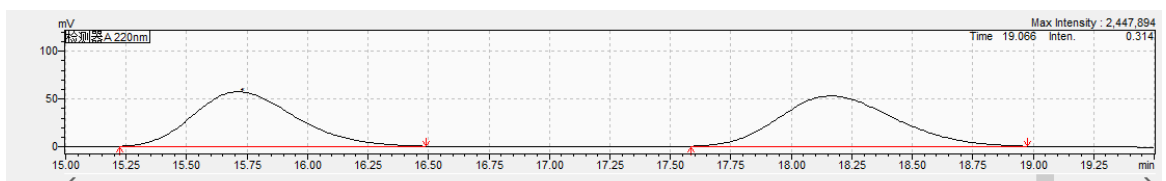

结果视图 - 峰表

| 峰号 | 保留时间   | 面积      | 高度     | 标记 | 浓度      | 浓度单位 | 化合物ID号 | 化合物名 | 面积%     |
|----|--------|---------|--------|----|---------|------|--------|------|---------|
| 1  | 15.713 | 1659326 | 56655  | M  | 48.845  |      |        |      | 48.845  |
| 2  | 18.164 | 1737783 | 52334  | M  | 51.155  |      |        |      | 51.155  |
| 总计 |        | 3397109 | 108989 |    | 100.000 |      |        |      | 100.000 |

## (R)-3-(benzo[d][1,3]dioxol-5-yl)-1-benzylpyrrolidine-2,5-dione (11i)

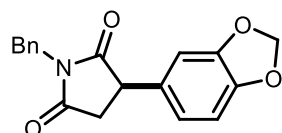

White solid. Yield: 40% yield (**L5**); 45% yield (**L9**)

$^1\text{H}$  NMR (400 MHz,  $\text{CDCl}_3$ )  $\delta$  7.43 – 7.33 (m, 2H), 7.32 – 7.23 (m, 3H), 6.79 – 6.66 (m, 1H), 6.62 – 6.51 (m, 2H), 5.90 (s, 2H), 4.75 – 4.59 (m, 2H), 3.88 (dd,  $J_1 = 9.5$  Hz,  $J_2 = 4.8$  Hz, 1H), 3.13 (dd,  $J_1 = 18.5$  Hz,  $J_2 = 9.5$  Hz, 1H), 2.71 (dd,  $J_1 = 18.5$  Hz,  $J_2 = 4.8$  Hz, 1H).

$^{13}\text{C}$  NMR (101 MHz,  $\text{CDCl}_3$ )  $\delta$  177.6, 175.8, 148.4, 147.5, 135.8, 130.8, 128.9, 128.8, 128.2, 120.9, 108.9, 107.8, 101.4, 45.7, 42.8, 37.4.

HPLC trace: Daicel chiralcel OD-H, hexane/*i*-PrOH = 80/20, 220 nm, 1.1 mL/min.

**L5:**  $t_{R1}$  = 19.7 min (minor),  $t_{R2}$  = 23.1 min (major); ee = 88.4%.

**L9:**  $t_{R1}$  = 19.6 min (minor),  $t_{R2}$  = 23.0 min (major); ee = 59.6%.

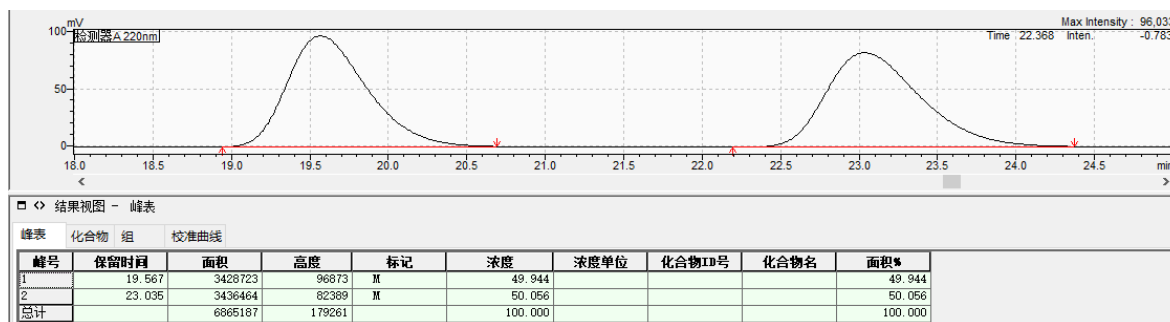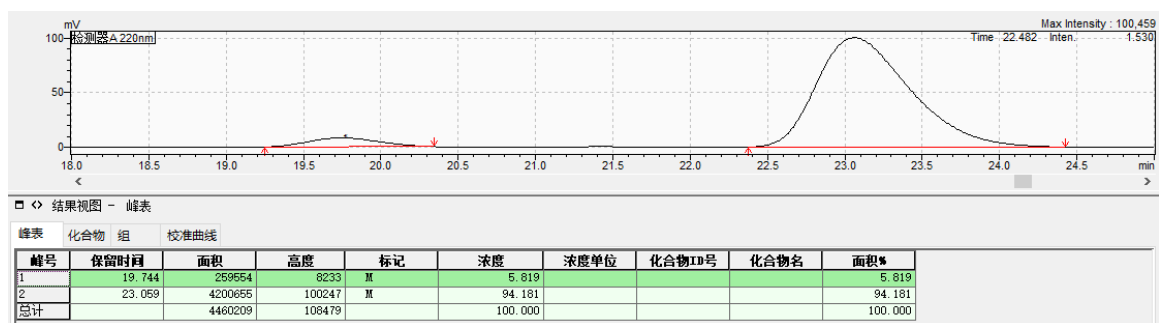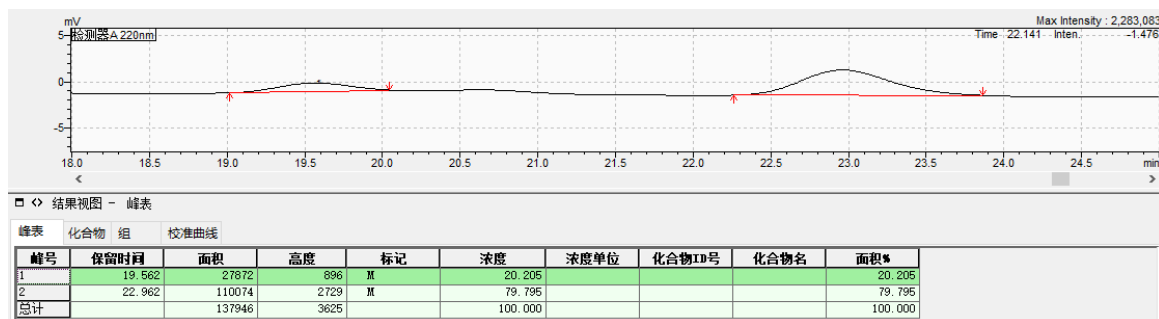

### (*R*)-1-benzyl-3-(naphthalen-1-yl)pyrrolidine-2,5-dione (11j)

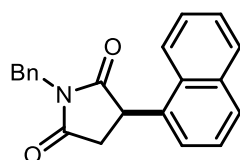

White solid. Yield: 42% yield (**L5**); 55% yield (**L9**)

$^1\text{H}$  NMR (400 MHz,  $\text{CDCl}_3$ )  $\delta$  7.89 (dd,  $J_1 = 8.1$  Hz,  $J_2 = 1.4$  Hz, 1H), 7.81 (d,  $J = 8.3$  Hz, 1H), 7.65 (d,  $J = 8.5$  Hz, 1H), 7.55 – 7.47 (m, 3H), 7.47 – 7.31 (m, 5H), 7.21 (dd,  $J_1 = 7.1$

Hz,  $J_2 = 1.2$  Hz, 1H), 4.83 (dd,  $J_1 = 13.8$  Hz,  $J_2 = 2.3$  Hz, 2H), 4.70 (dd,  $J_1 = 9.7$  Hz,  $J_2 = 5.0$

Hz, 1H), 3.35 (dd,  $J_1 = 18.5$  Hz,  $J_2 = 9.7$  Hz, 1H), 2.82 (dd,  $J_1 = 18.5$  Hz,  $J_2 = 5.0$  Hz, 1H).

$^{13}\text{C}$  NMR (101 MHz,  $\text{CDCl}_3$ )  $\delta$  177.6, 175.8, 148.4, 147.5, 135.8, 130.8, 128.9, 128.8, 128.2, 120.9, 108.9, 107.8, 101.4, 45.7, 42.8, 37.4.

HPLC trace: Daicel chiralcel OD-H, hexane/*i*-PrOH = 80/20, 220 nm, 1.1 mL/min.

**L5:**  $t_{R1} = 24.0$  min (minor),  $t_{R2} = 29.7$  min (major); ee = 52.6%.

**L9:**  $t_{R1} = 24.2$  min (minor),  $t_{R2} = 29.6$  min (major); ee = 95.0%.

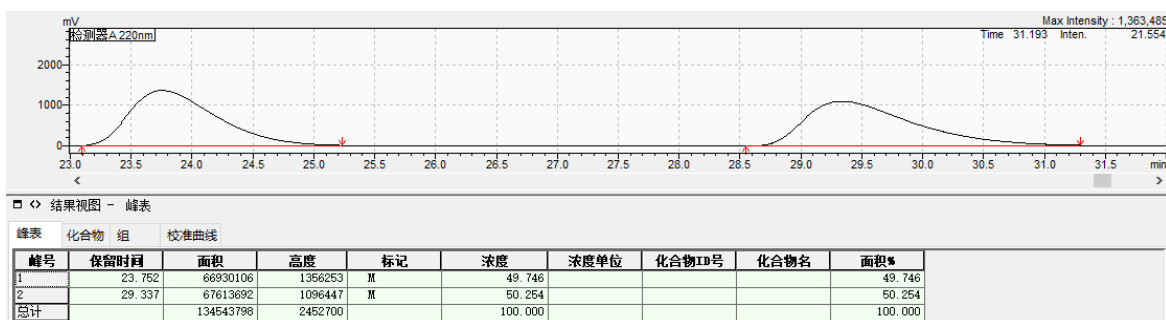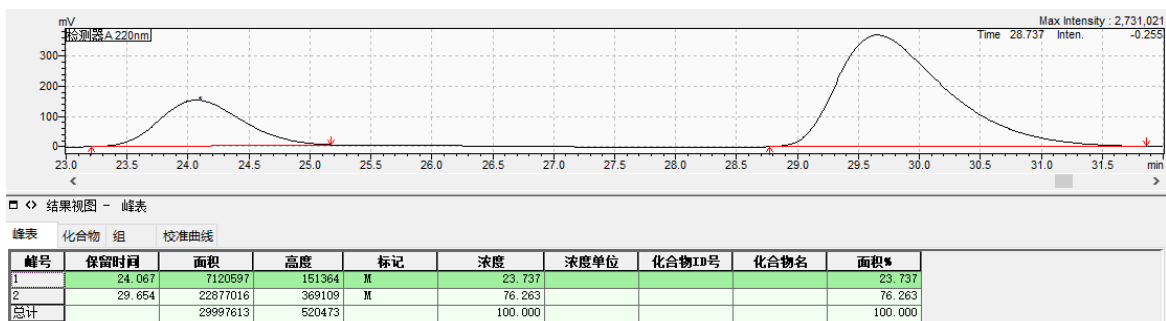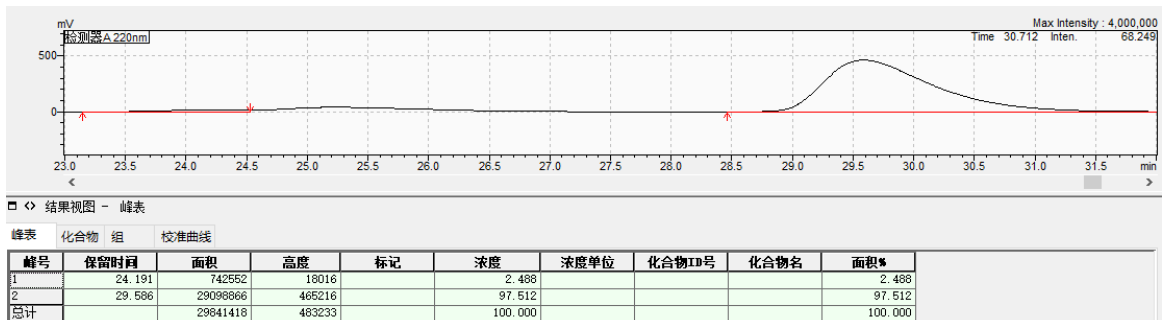

**(S)-1-benzyl-3-(naphthalen-2-yl)pyrrolidine-2,5-dione (11k)**

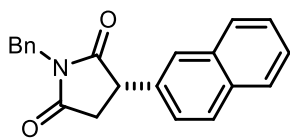

White solid. Yield: 54% yield (**L5**); 47% yield (**L9**)

$^1\text{H}$  NMR (500 MHz,  $\text{CDCl}_3$ )  $\delta$  7.88 – 7.82 (m, 2H), 7.82 – 7.76 (m, 1H), 7.66 (d,  $J = 1.8$  Hz, 1H), 7.56 – 7.47 (m, 4H), 7.42 – 7.33 (m, 3H), 7.25 (dd,  $J_1 = 8.5$  Hz,  $J_2 = 1.9$  Hz, 1H), 4.81 (dd,  $J_1 = 28.5$  Hz,  $J_2 = 14.1$  Hz, 2H), 4.17 (dd,  $J_1 = 9.5$  Hz,  $J_2 = 4.7$  Hz, 1H), 3.26 (dd,  $J_1 = 18.5$  Hz,  $J_2 = 9.6$  Hz, 1H), 2.92 (dd,  $J_1 = 18.5$  Hz,  $J_2 = 4.7$  Hz, 1H).

$^{13}\text{C}$  NMR (126 MHz,  $\text{CDCl}_3$ )  $\delta$  177.5, 175.9, 135.9, 134.6, 133.4, 132.8, 129.3, 128.9, 128.8, 128.1, 127.8, 127.7, 126.6, 126.6, 126.4, 124.8, 46.0, 42.8, 37.2.

HPLC trace: Daicel chiralcel OD-H, hexane/*i*-PrOH = 80/20, 220 nm, 1.1 mL/min.

**L5**:  $t_{\text{R}1} = 17.2$  min (major),  $t_{\text{R}2} = 21.5$  min (minor); ee = 80.4%.

**L9**:  $t_{\text{R}1} = 17.1$  min (major),  $t_{\text{R}2} = 21.5$  min (minor); ee = 61.2%.

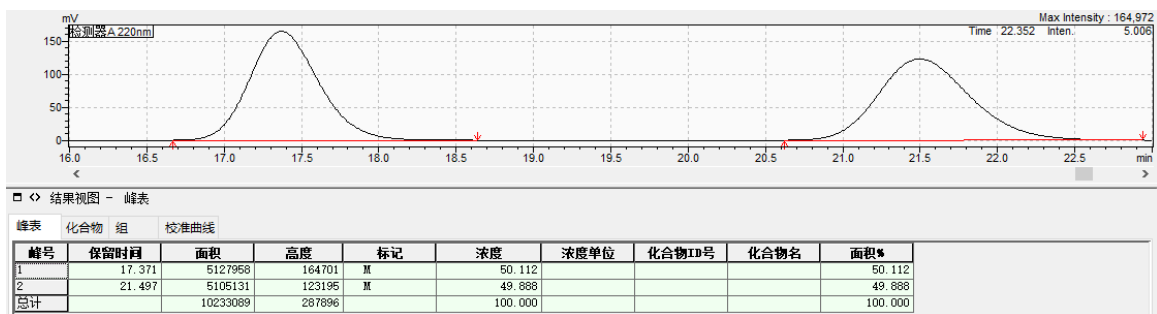



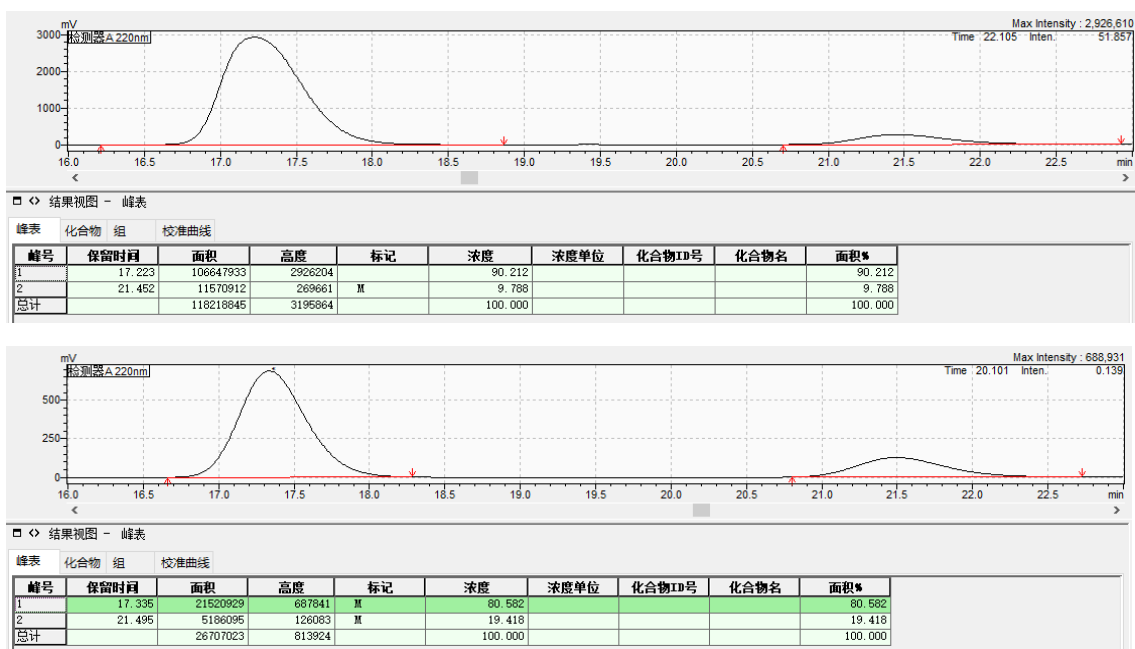

**(R)-1-benzyl-3-(3-methoxyphenyl)pyrrolidine-2,5-dione (11l)**

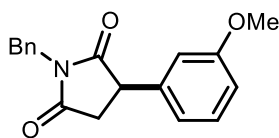

White solid. Yield: 58% yield (**L5**); 66% yield (**L9**)

$^1\text{H}$  NMR (400 MHz,  $\text{CDCl}_3$ )  $\delta$  7.38 – 7.28 (m, 2H), 7.27 – 7.09 (m, 4H), 6.74 (dd,  $J_1 = 8.1$  Hz,  $J_2 = 2.5$  Hz, 1H), 6.68 – 6.60 (m, 1H), 6.57 (t,  $J = 2.2$  Hz, 1H), 4.72 – 4.52 (m, 2H), 3.88 (dd,  $J_1 = 9.5$  Hz,  $J_2 = 4.6$  Hz 1H), 3.64 (s, 3H), 3.09 (dd,  $J_1 = 18.5$  Hz,  $J_2 = 9.5$  Hz, 1H), 2.71 (dd,  $J_1 = 18.5$  Hz,  $J_2 = 4.6$  Hz, 1H).

$^{13}\text{C}$  NMR (101 MHz,  $\text{CDCl}_3$ )  $\delta$  177.4, 175.9, 160.2, 138.8, 135.9, 130.4, 128.9, 128.8, 128.1, 119.6, 113.5, 113.2, 55.3, 46.0, 42.8, 37.3.

HPLC trace: Daicel chiralcel OD-H, hexane/*i*-PrOH = 80/20, 220 nm, 1.1 mL/min.

**L5**:  $t_{R1} = 16.6$  min (minor),  $t_{R2} = 22.8$  min (major); ee = 37.6%.

**L9**:  $t_{R1} = 16.6$  min (minor),  $t_{R2} = 22.8$  min (major); ee = 45.6%.

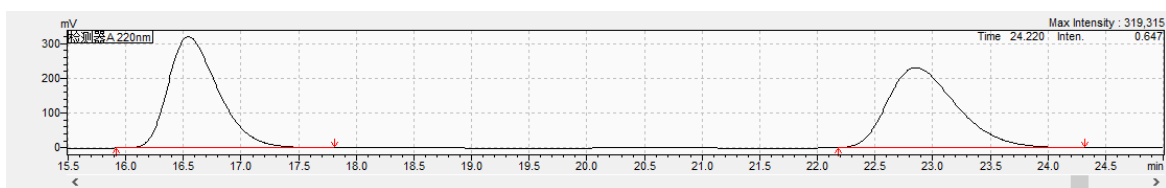

结果视图 - 峰表

峰表 化合物 组 校准曲线

| 峰号 | 保留时间   | 面积       | 高度     | 标记 | 浓度      | 浓度单位 | 化合物ID号 | 化合物名 | 面积%     |
|----|--------|----------|--------|----|---------|------|--------|------|---------|
| 1  | 16.545 | 9628609  | 319514 | M  | 50.162  |      |        |      | 50.162  |
| 2  | 22.853 | 9566604  | 230628 | M  | 49.838  |      |        |      | 49.838  |
| 总计 |        | 19195213 | 550142 |    | 100.000 |      |        |      | 100.000 |

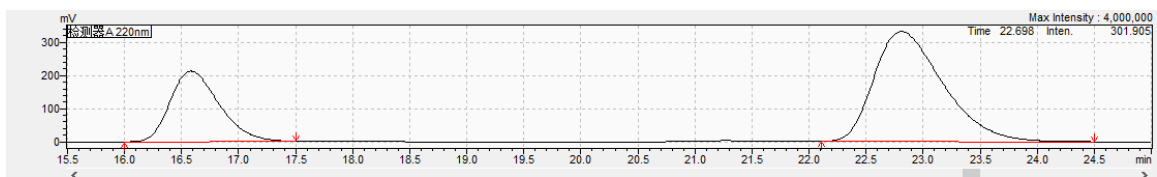

结果视图 - 峰表

峰表 化合物 组 校准曲线

| 峰号 | 保留时间   | 面积       | 高度     | 标记 | 浓度      | 浓度单位 | 化合物ID号 | 化合物名 | 面积%     |
|----|--------|----------|--------|----|---------|------|--------|------|---------|
| 1  | 16.582 | 6323563  | 213091 | M  | 31.155  |      |        |      | 31.155  |
| 2  | 22.810 | 13913507 | 332295 | M  | 68.845  |      |        |      | 68.845  |
| 总计 |        | 20297070 | 545386 |    | 100.000 |      |        |      | 100.000 |

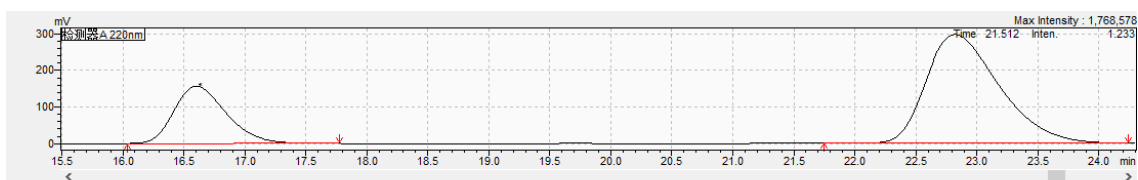

结果视图 - 峰表

峰表 化合物 组 校准曲线

| 峰号 | 保留时间   | 面积       | 高度     | 标记 | 浓度      | 浓度单位 | 化合物ID号 | 化合物名 | 面积%     |
|----|--------|----------|--------|----|---------|------|--------|------|---------|
| 1  | 16.603 | 4626873  | 156533 | M  | 27.159  |      |        |      | 27.159  |
| 2  | 22.825 | 12409629 | 297313 | M  | 72.841  |      |        |      | 72.841  |
| 总计 |        | 17036502 | 453846 |    | 100.000 |      |        |      | 100.000 |

## 7. Heterocycle-oxazolines for Asymmetric Synthesis of 11h

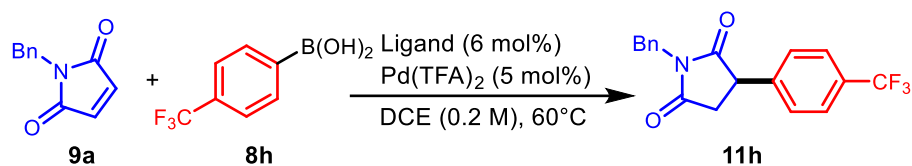

### Ligand Screening

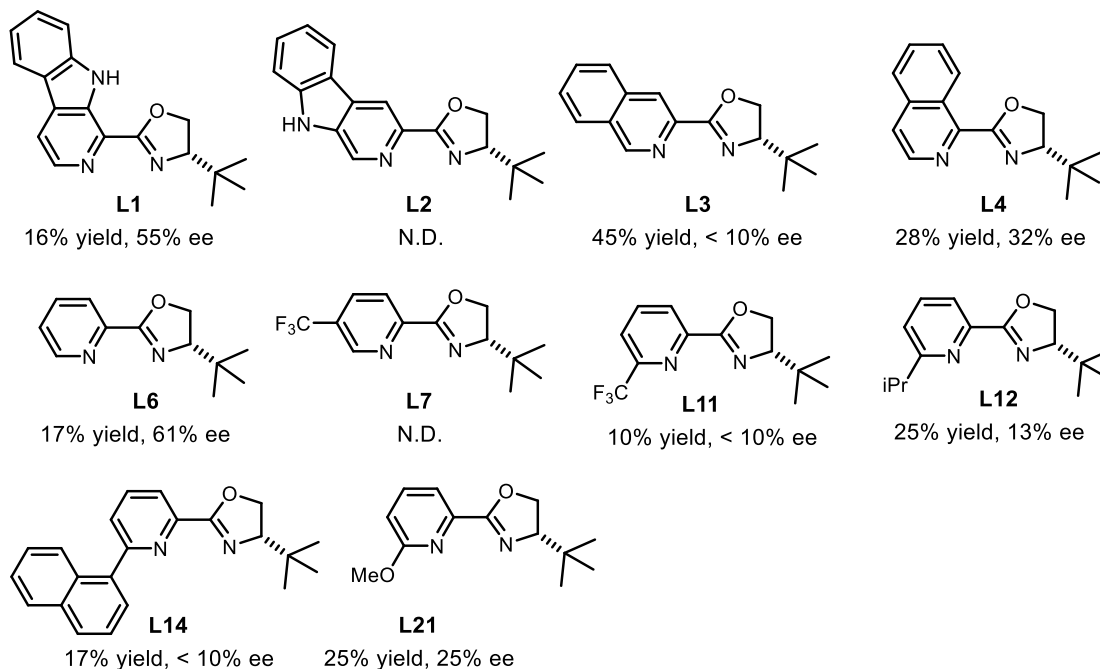

### New heterocycle-oxazolines Ligand

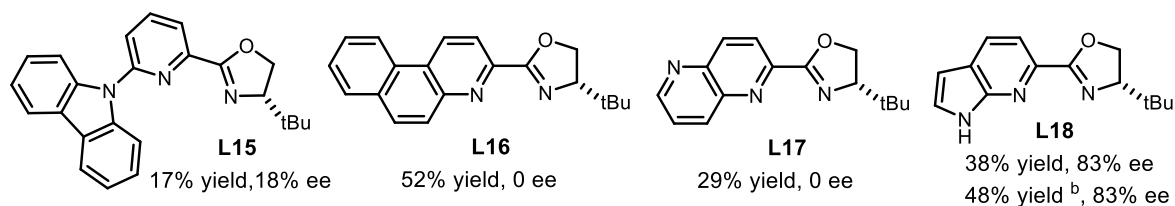

a, unless otherwise mentioned, the yields referred to HPLC yield. The ee values were determined by HPLC analysis on a chiral phase. b, Isolated yield. N.D. = not detected.

HPLC trace: Daicel chiralcel OD-H, hexane/*i*-PrOH = 80/20, 220 nm, 1.1 mL/min.

**L18:**  $t_{R1}$  = 15.7 min (minor),  $t_{R2}$  = 18.0 min (major); ee = 82.7%.

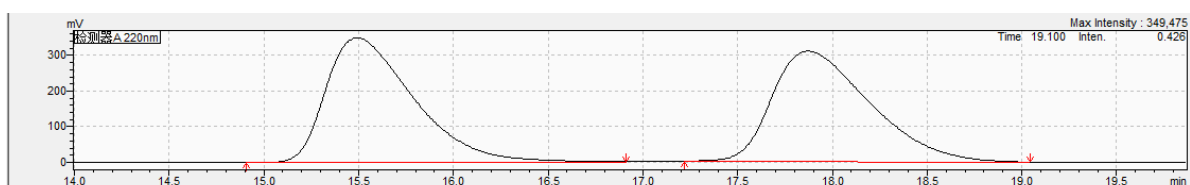

结果视图 - 峰表

峰表 化合物 组 校准曲线

| 峰号 | 保留时间   | 面积       | 高度     | 标记 | 浓度      | 浓度单位 | 化合物ID号 | 化合物名 | 面积%     |
|----|--------|----------|--------|----|---------|------|--------|------|---------|
| 1  | 15.491 | 11280236 | 349904 |    | 50.506  |      |        |      | 50.506  |
| 2  | 17.871 | 11054009 | 309466 | M  | 49.494  |      |        |      | 49.494  |
| 总计 |        | 22334245 | 659370 |    | 100.000 |      |        |      | 100.000 |

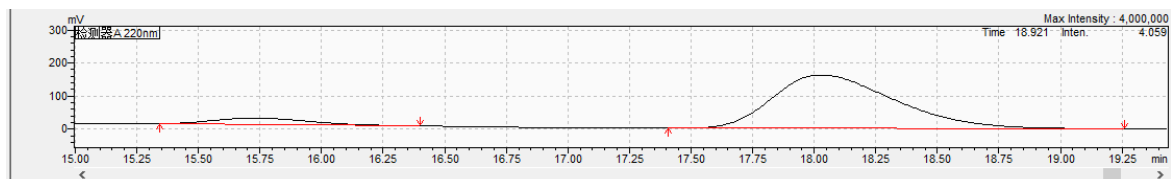

结果视图 - 峰表

峰表 化合物 组 校准曲线

| 峰号 | 保留时间   | 面积      | 高度     | 标记 | 浓度      | 浓度单位 | 化合物ID号 | 化合物名 | 面积%     |
|----|--------|---------|--------|----|---------|------|--------|------|---------|
| 1  | 15.730 | 524727  | 19504  | M  | 8.677   |      |        |      | 8.677   |
| 2  | 18.029 | 5522366 | 161432 | M  | 91.323  |      |        |      | 91.323  |
| 总计 |        | 6047092 | 180936 |    | 100.000 |      |        |      | 100.000 |

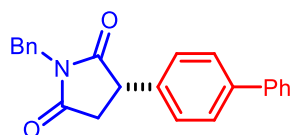

**11f:** 76% isolated yield.

HPLC trace: Daicel chiralcel OD-H, hexane/*i*-PrOH = 80/20, 220 nm, 1.2 mL/min.

**L18:**  $t_{R1}$  = 19.7 min (major),  $t_{R2}$  = 28.1 min (minor); ee = 66.0%.

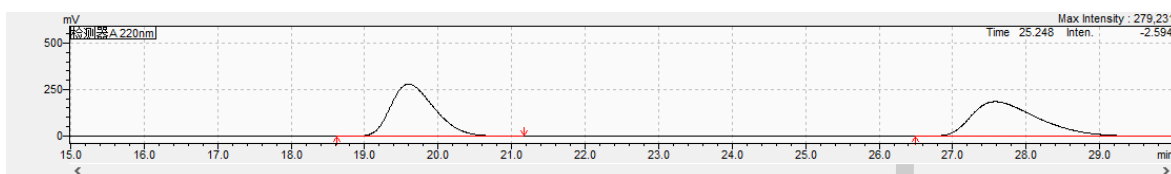

结果视图 - 峰表

峰表 化合物 组 校准曲线

| 峰号 | 保留时间   | 面积       | 高度     | 标记 | 浓度      | 浓度单位 | 化合物ID号 | 化合物名 | 面积%     |
|----|--------|----------|--------|----|---------|------|--------|------|---------|
| 1  | 19.596 | 11632930 | 281741 |    | 49.512  |      |        |      | 49.512  |
| 2  | 27.579 | 11862197 | 187483 |    | 50.488  |      |        |      | 50.488  |
| 总计 |        | 23495127 | 469224 |    | 100.000 |      |        |      | 100.000 |

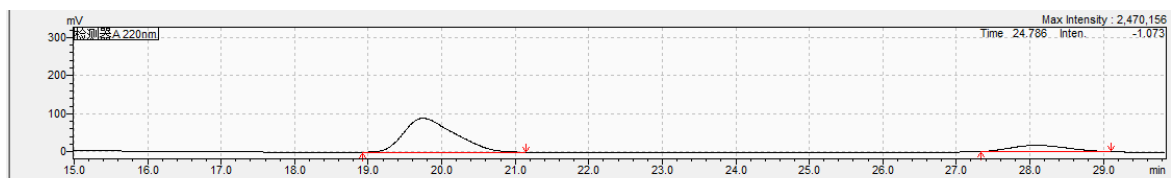

结果视图 - 峰表

峰表 化合物 组 校准曲线

| 峰号 | 保留时间   | 面积      | 高度     | 标记 | 浓度      | 浓度单位 | 化合物ID号 | 化合物名 | 面积%     |
|----|--------|---------|--------|----|---------|------|--------|------|---------|
| 1  | 19.746 | 4289129 | 89044  | M  | 83.067  |      |        |      | 83.067  |
| 2  | 28.089 | 874357  | 16406  | M  | 16.933  |      |        |      | 16.933  |
| 总计 |        | 5163485 | 105450 |    | 100.000 |      |        |      | 100.000 |

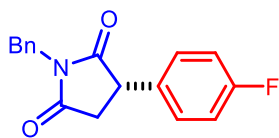

**11g**: 58% isolated yield.

HPLC trace: Daicel chiralcel OD-H, hexane/*i*-PrOH = 80/20, 220 nm, 1.2 mL/min.

**L18**:  $t_{R1}$  = 12.0 min (major),  $t_{R2}$  = 13.4 min (minor); ee = 71.6%.

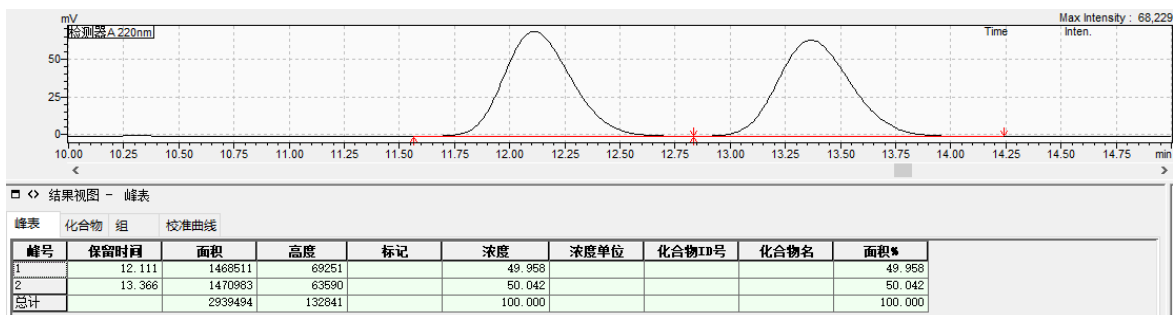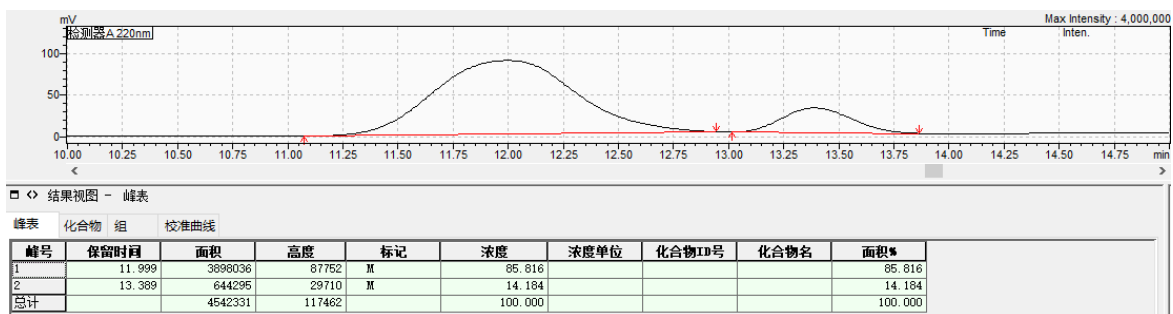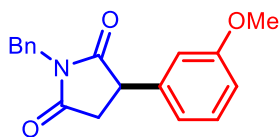

**11l**: 53% isolated yield.

HPLC trace: Daicel chiralcel OD-H, hexane/*i*-PrOH = 80/20, 220 nm, 1.2 mL/min.

**L18**:  $t_{R1}$  = 15.3 min (minor),  $t_{R2}$  = 20.3 min (major); ee = 57.6%.

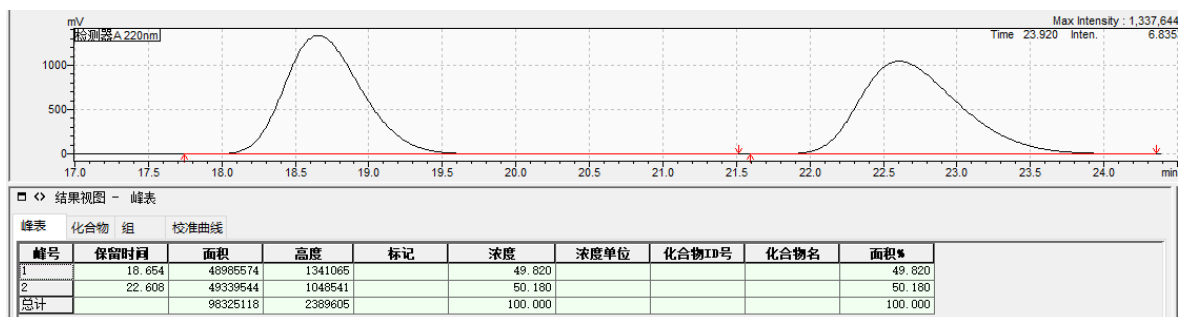

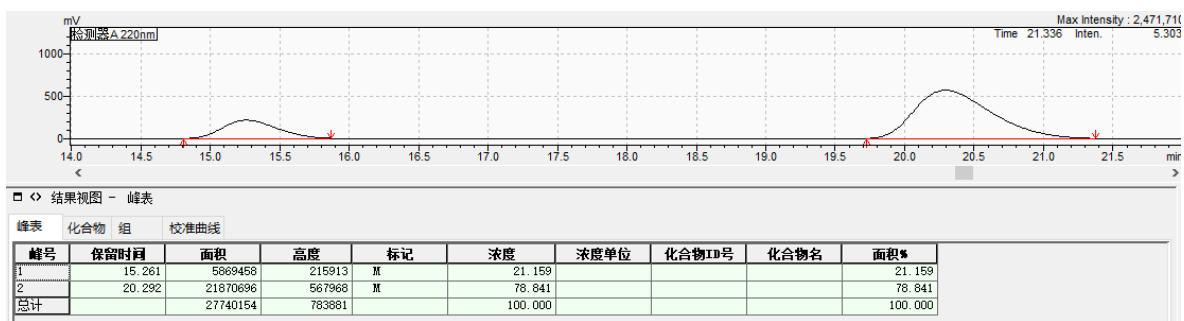

## 8. NMR spectra

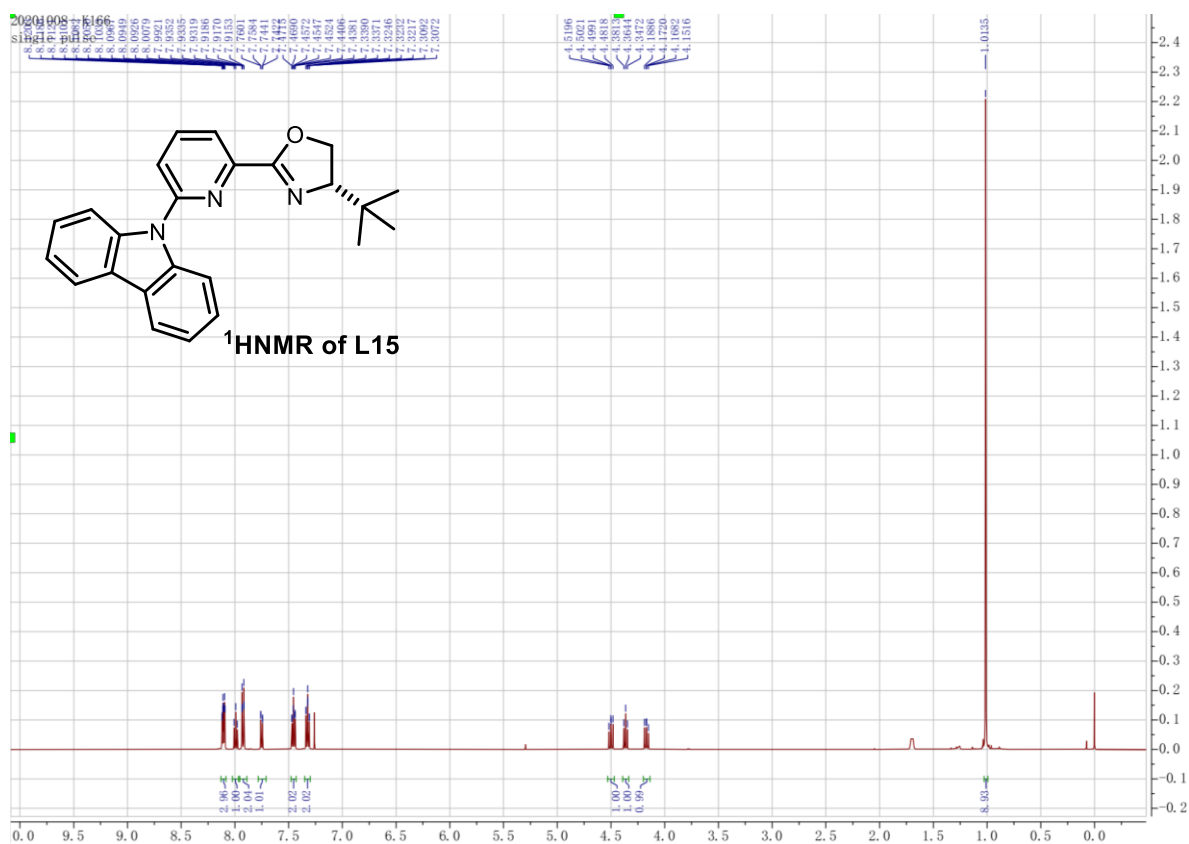







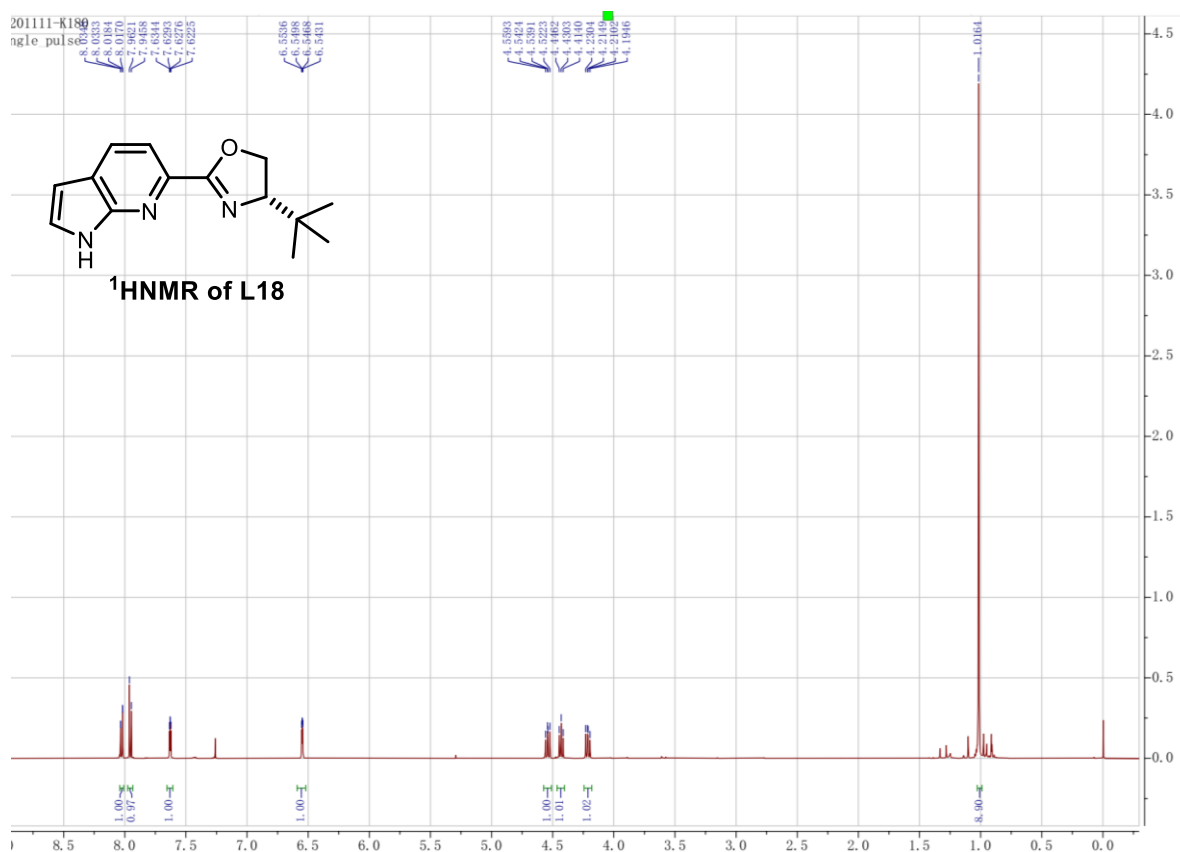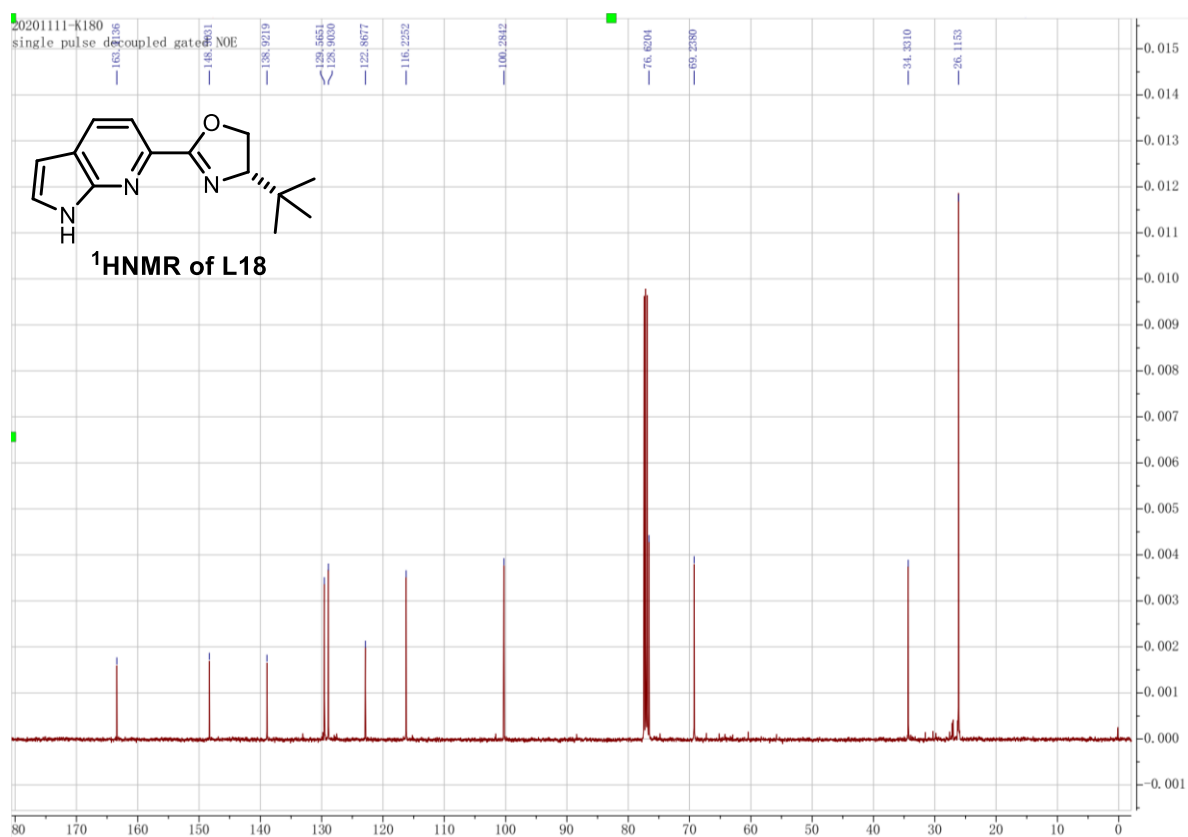

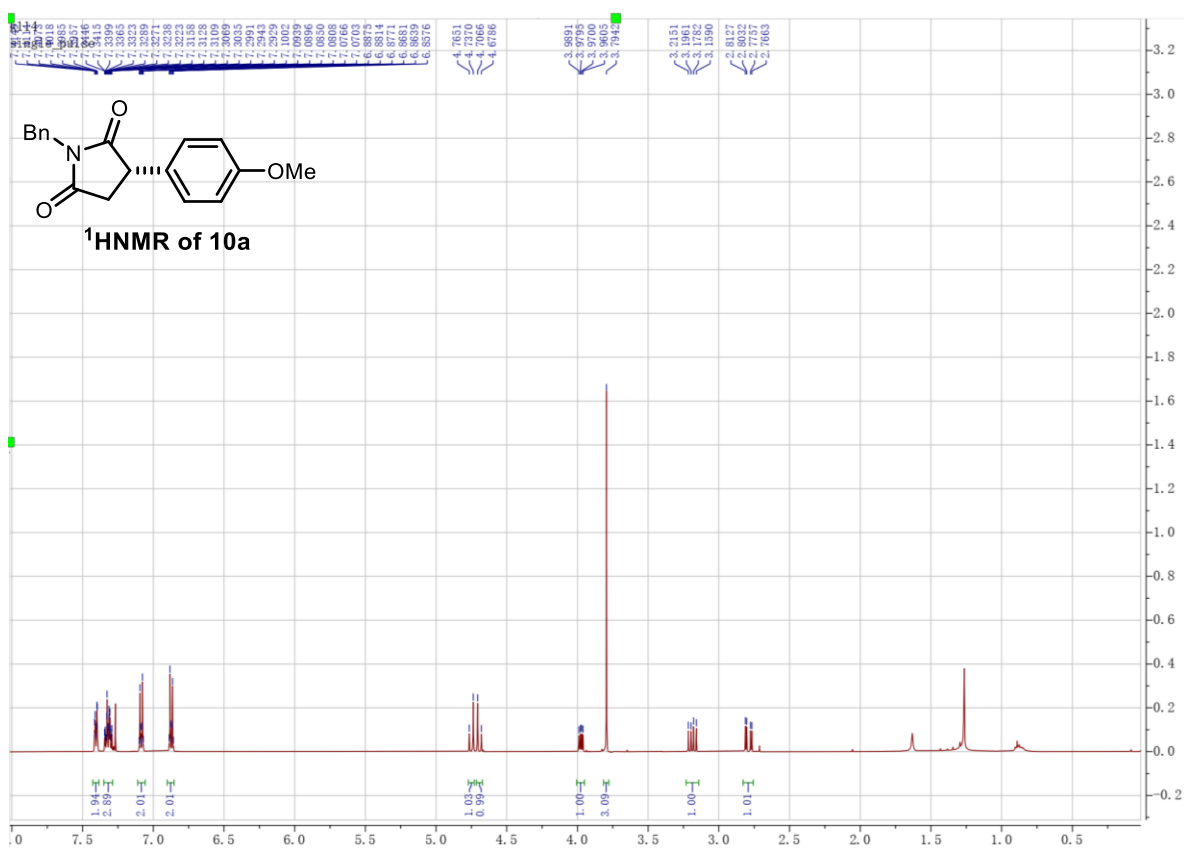



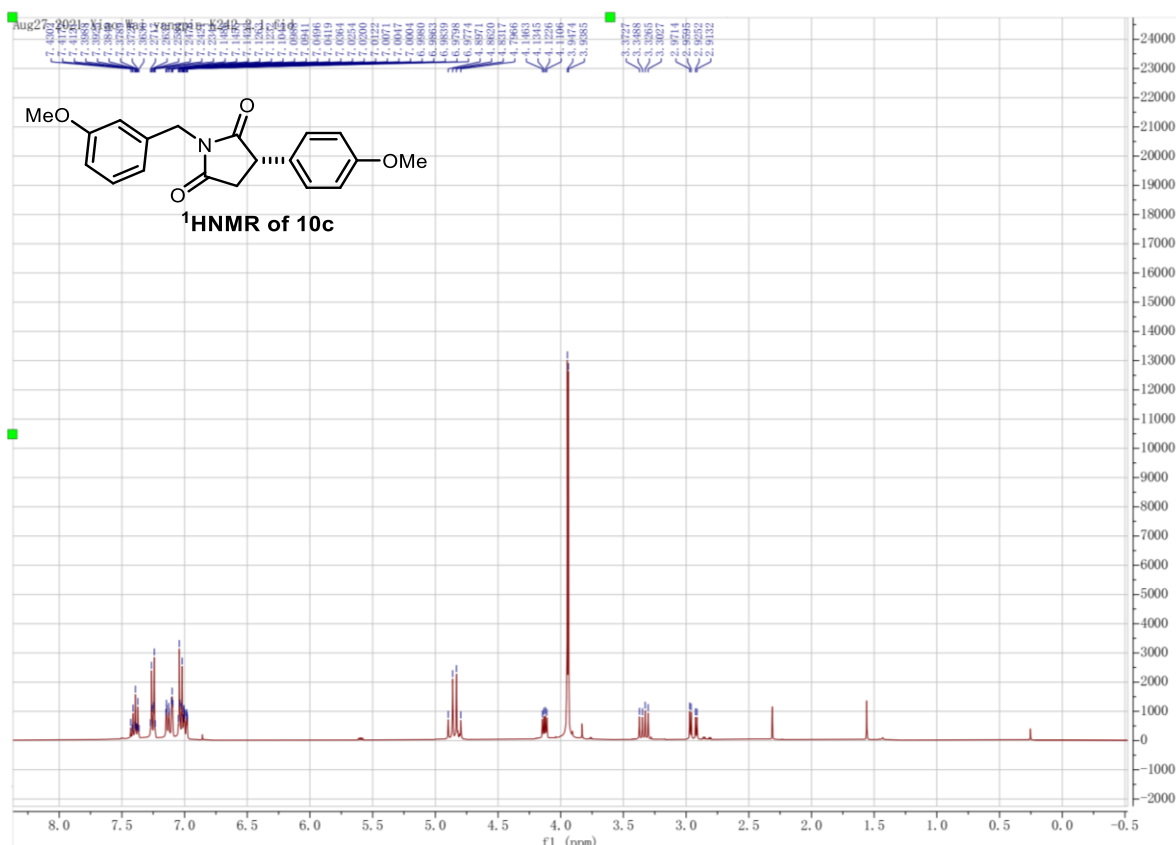



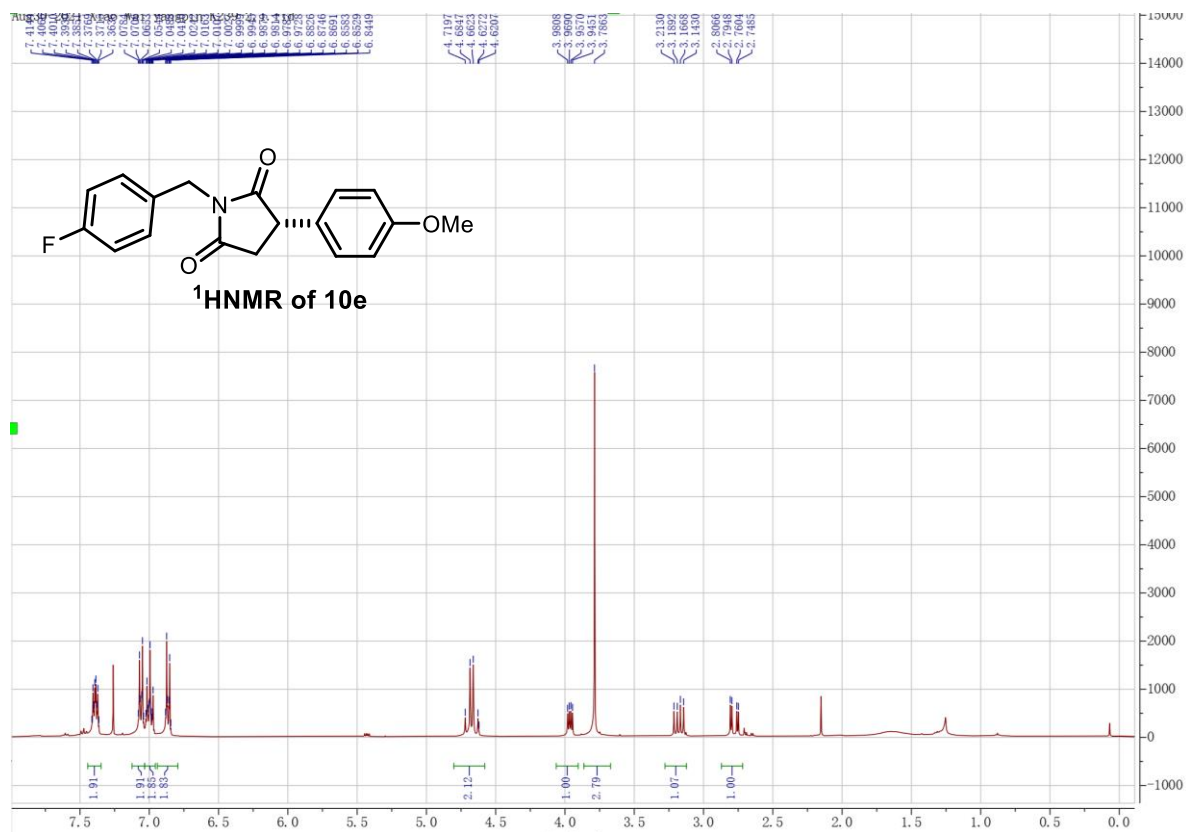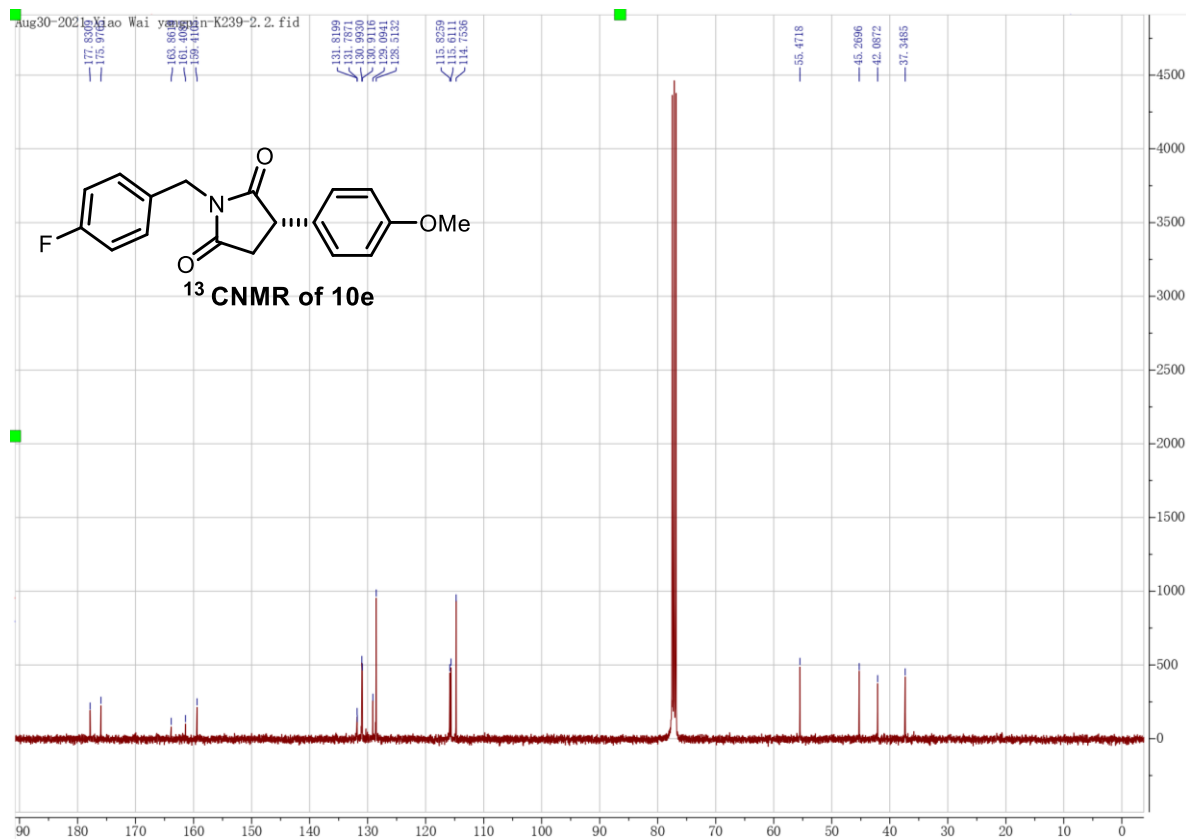





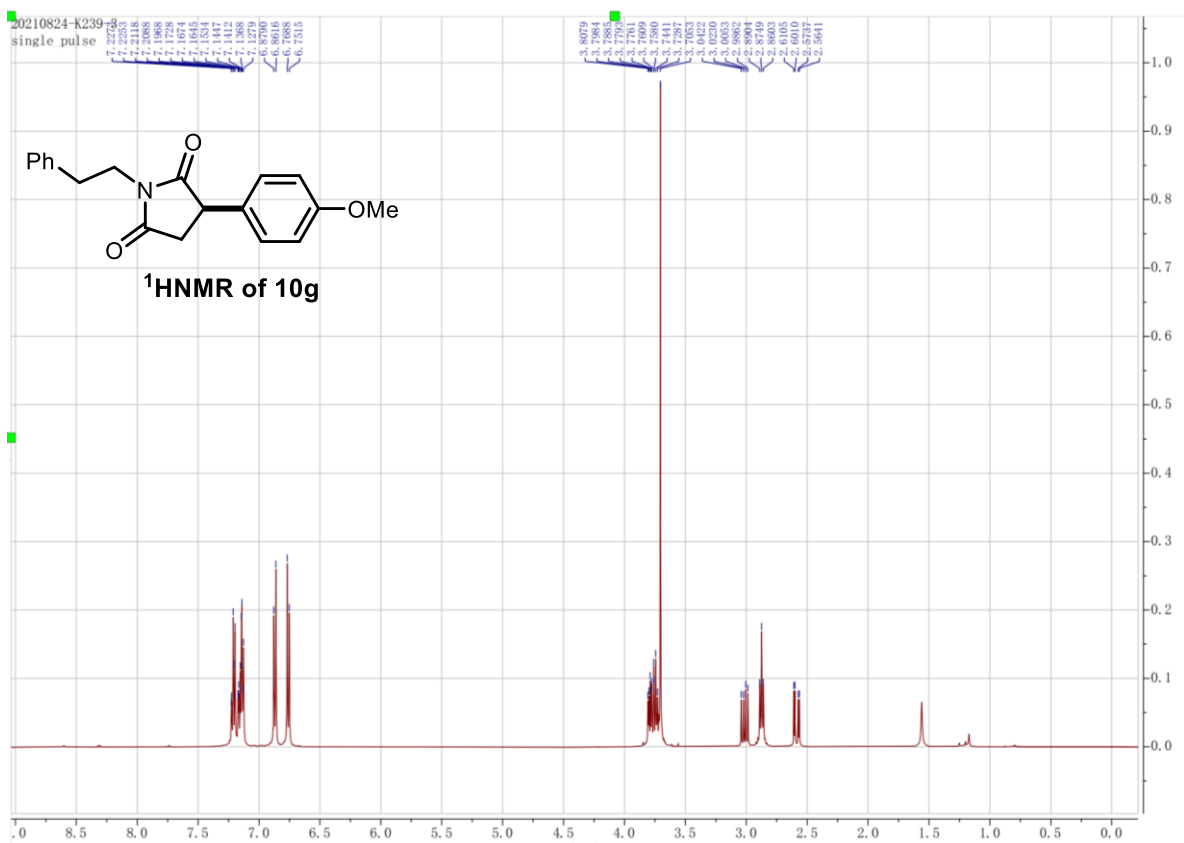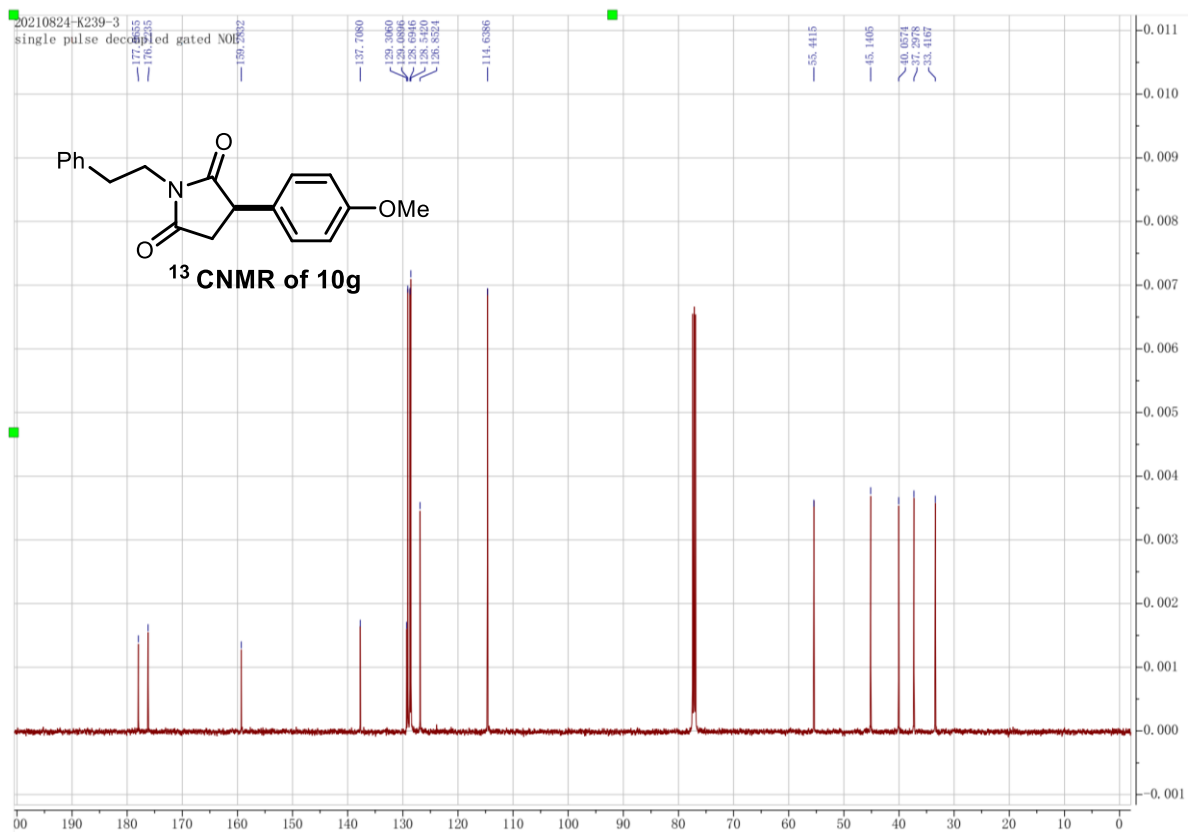

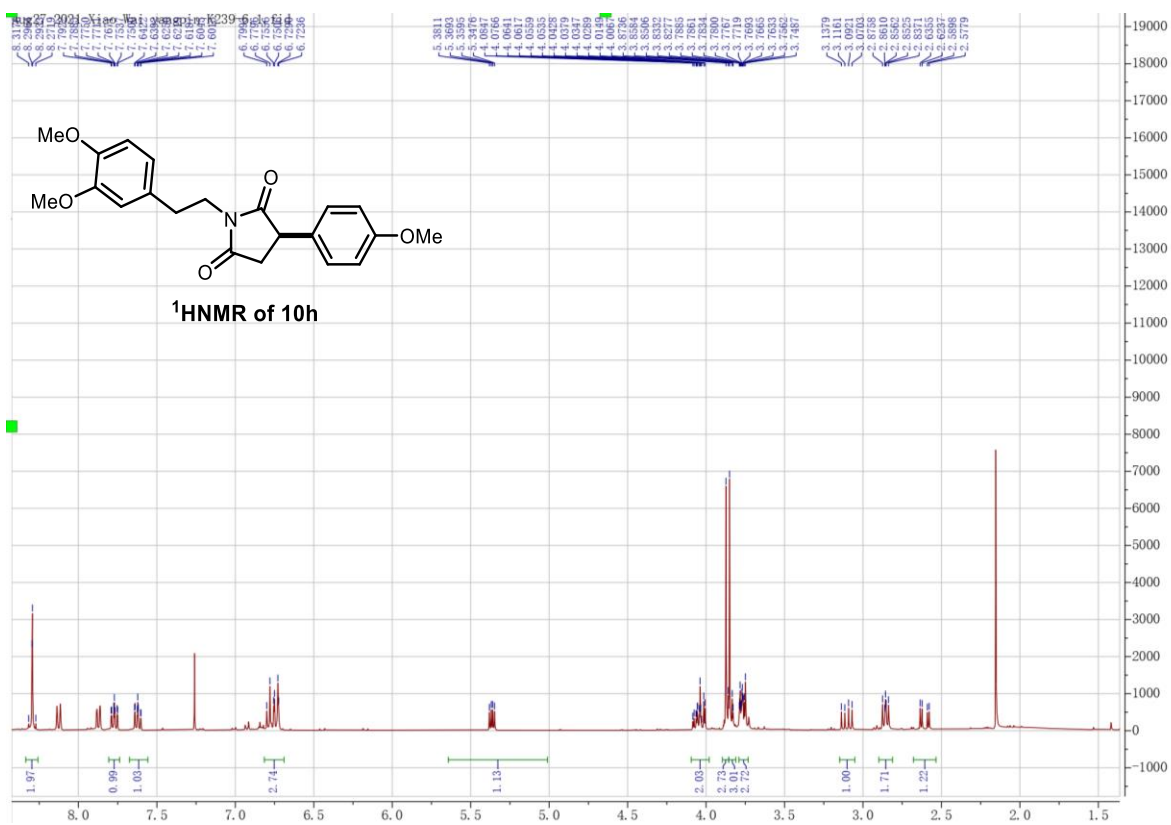

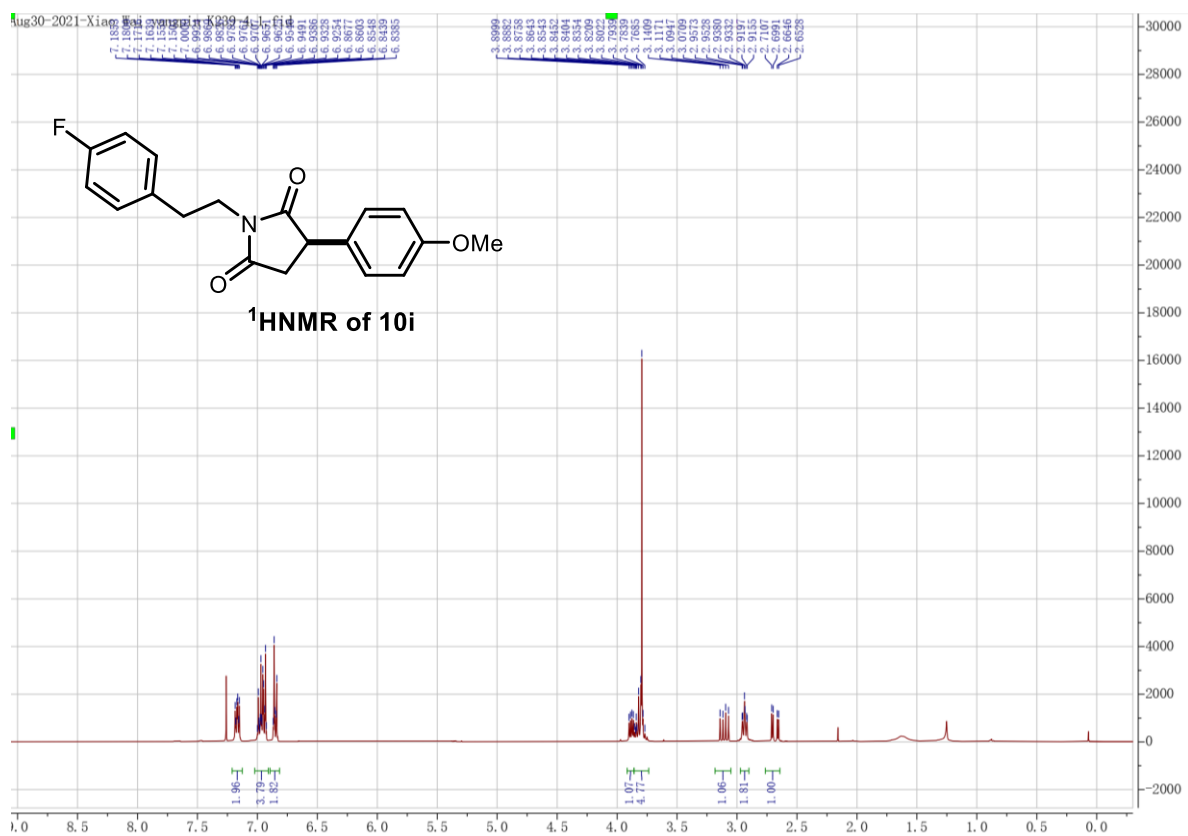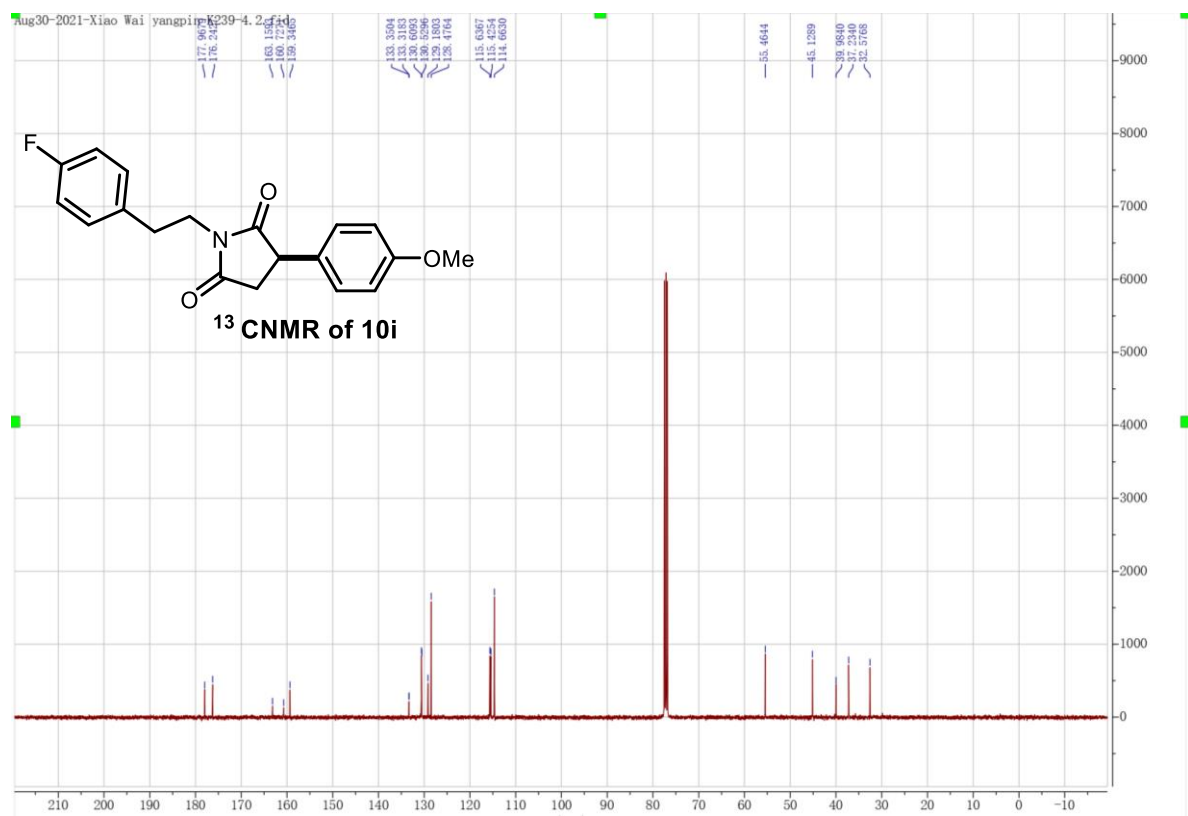

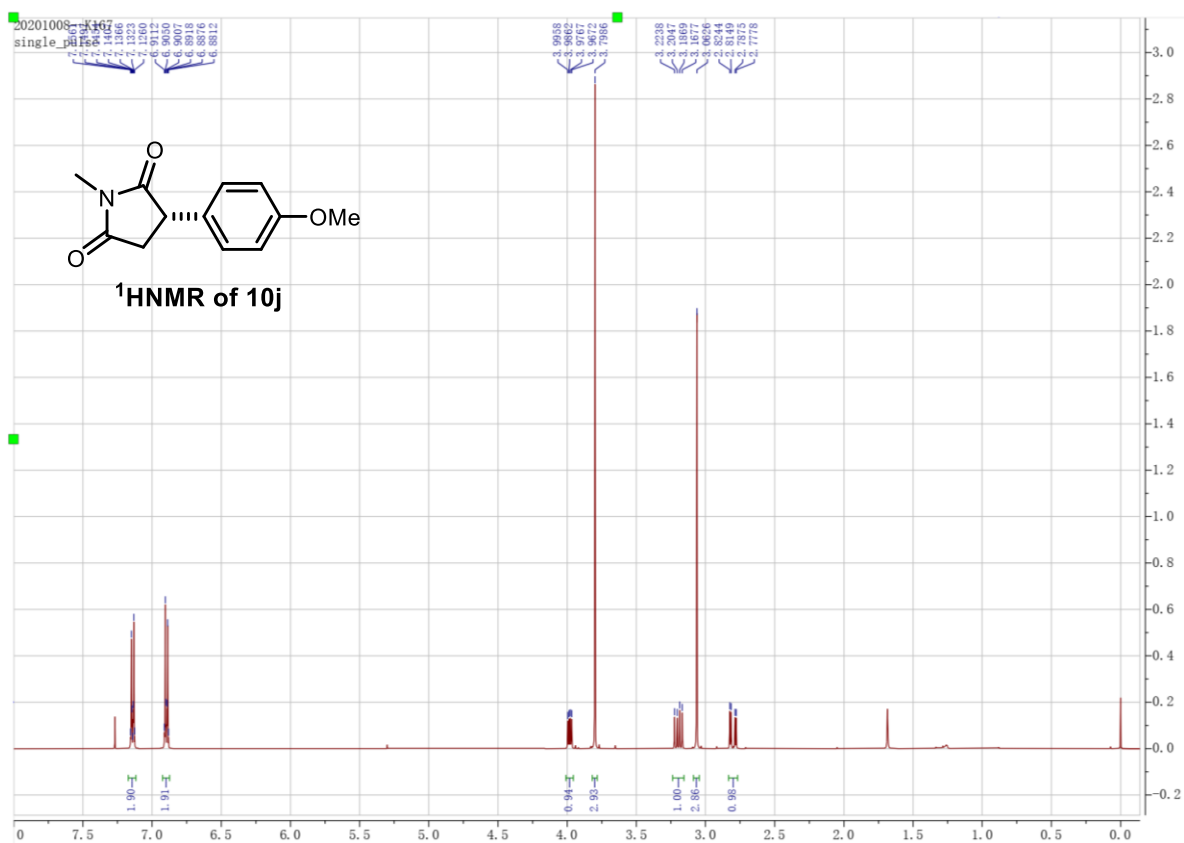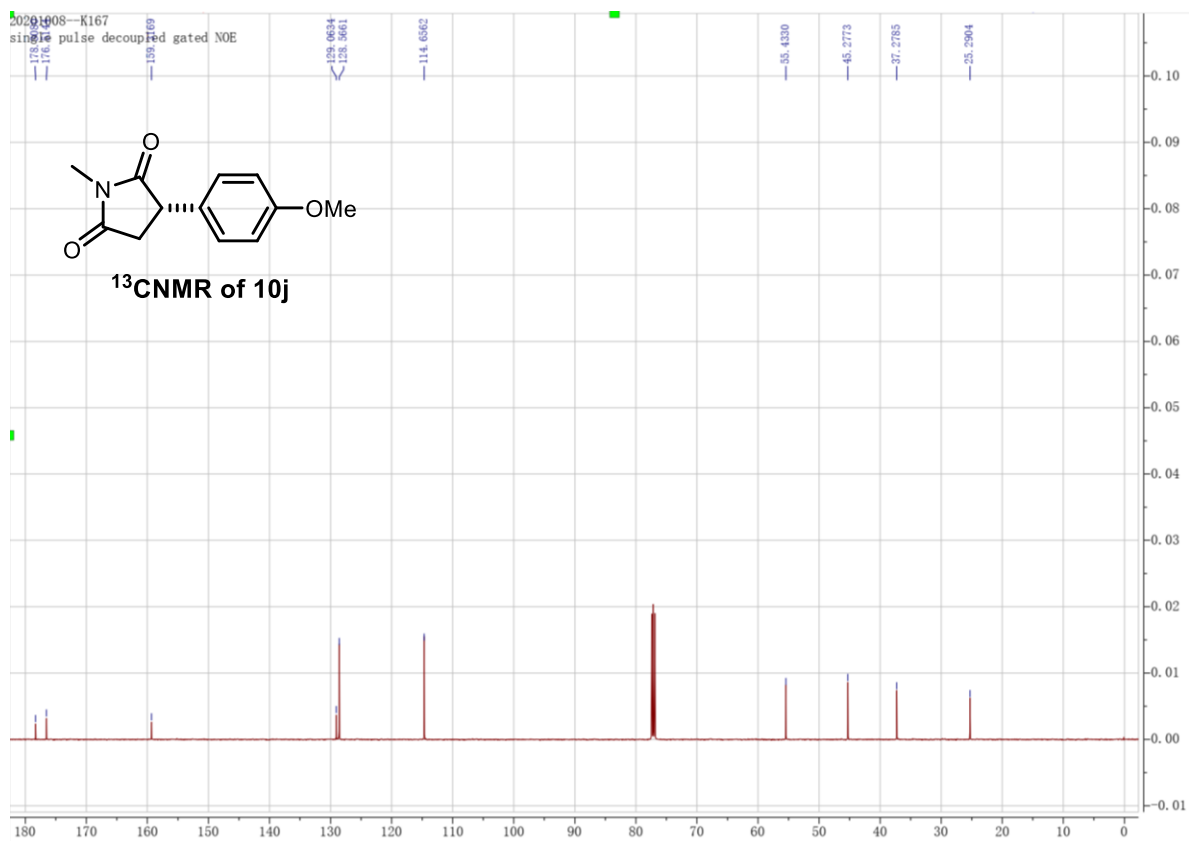





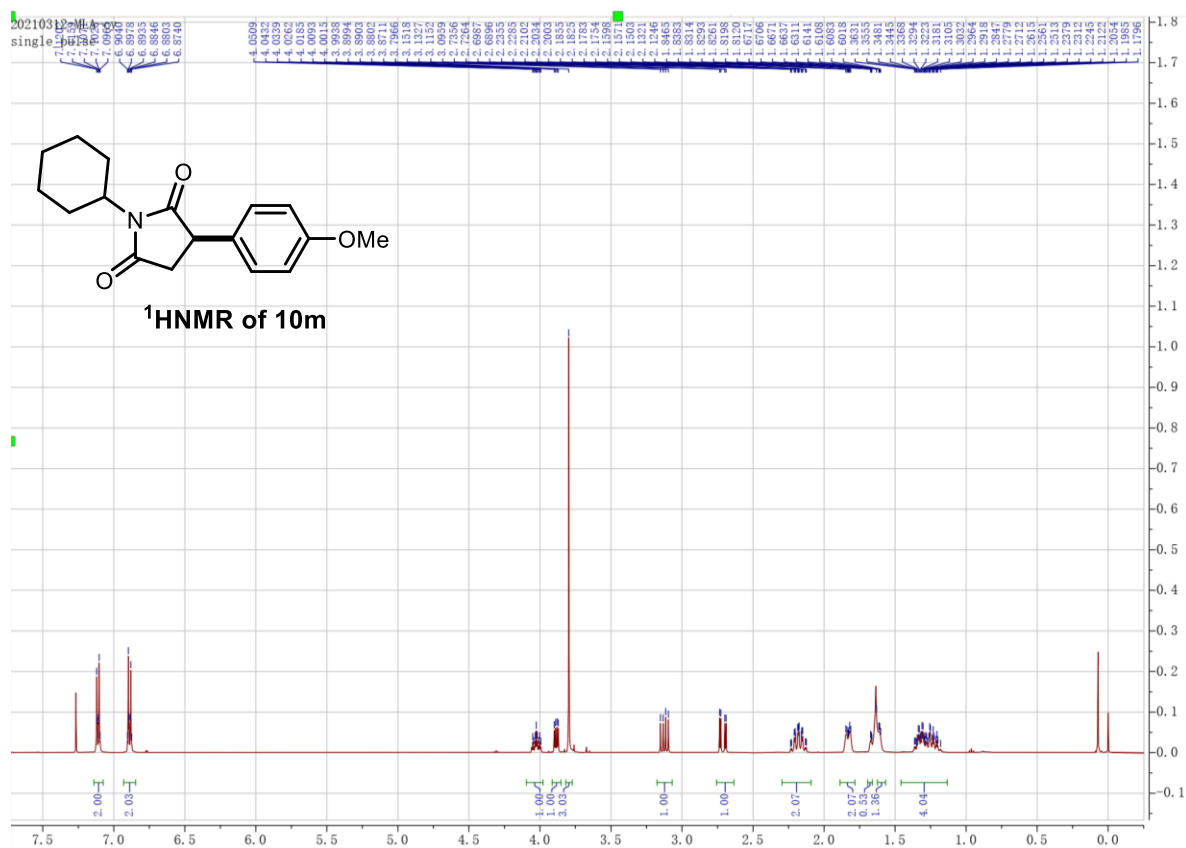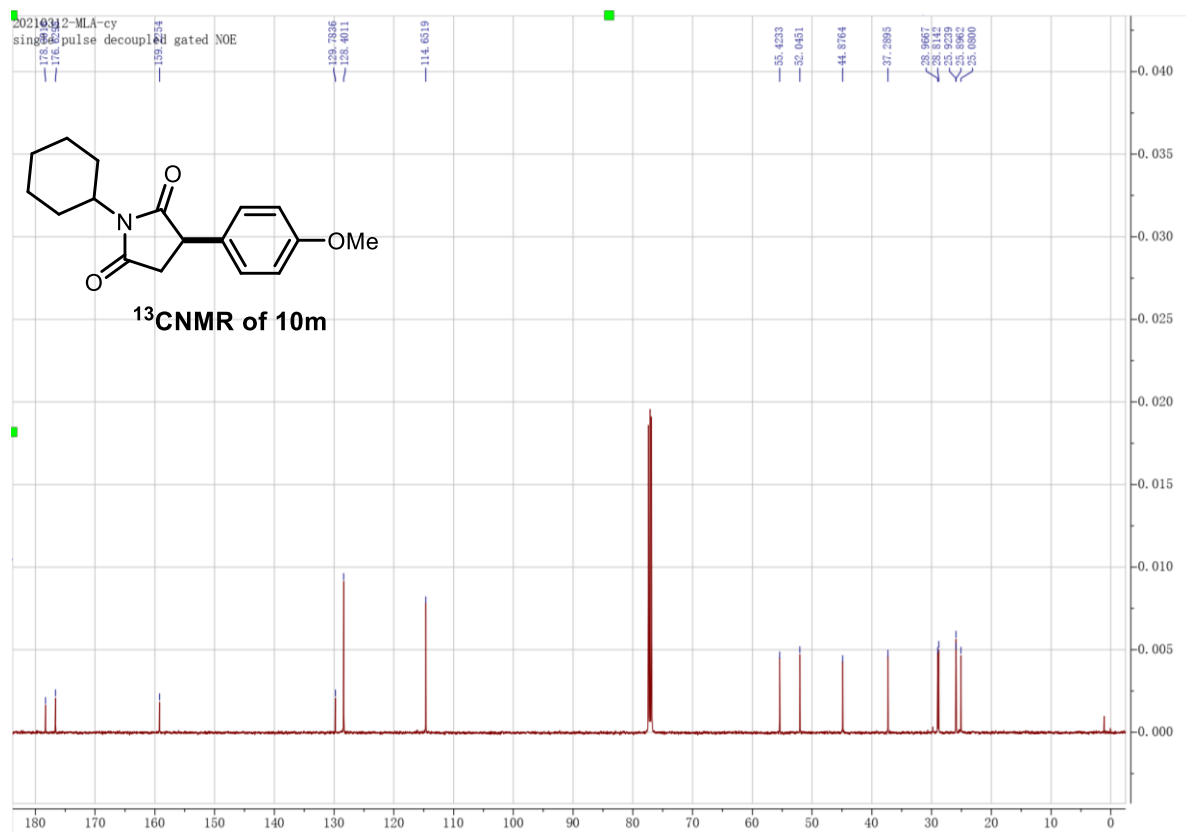

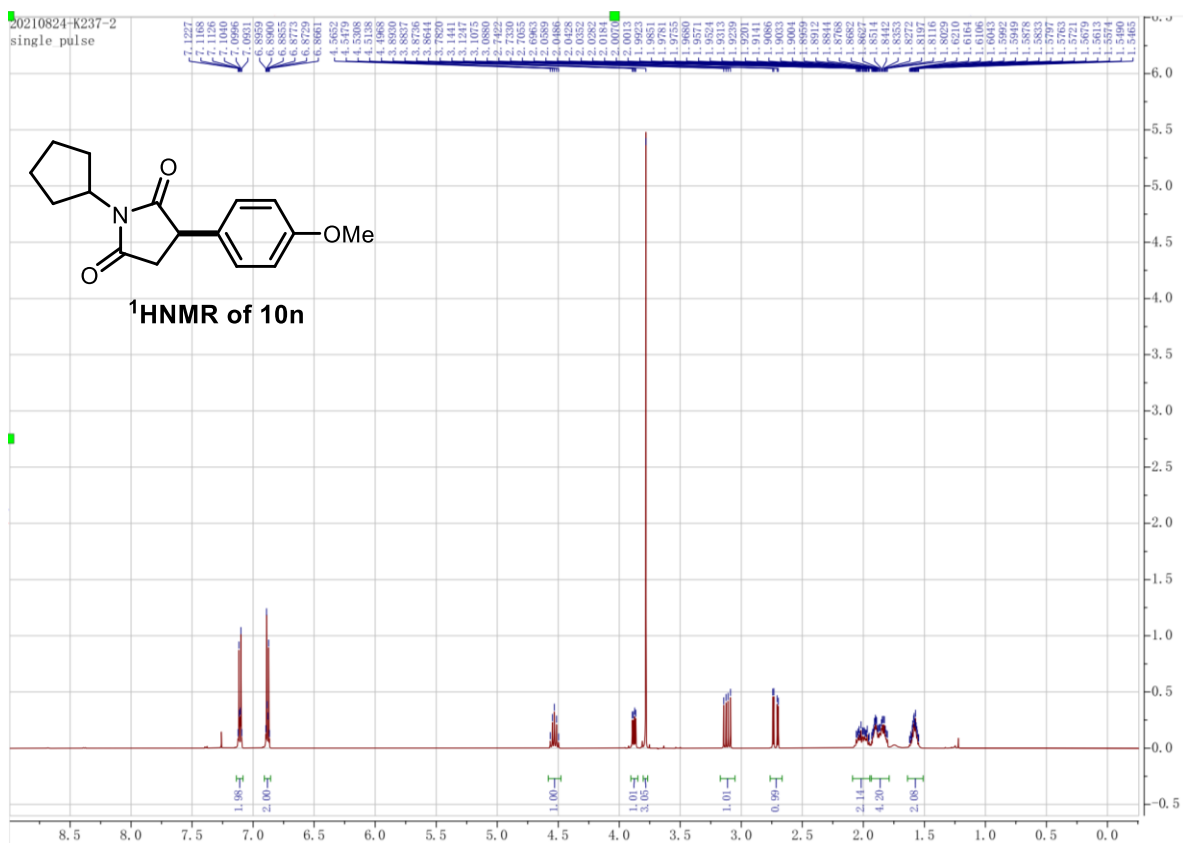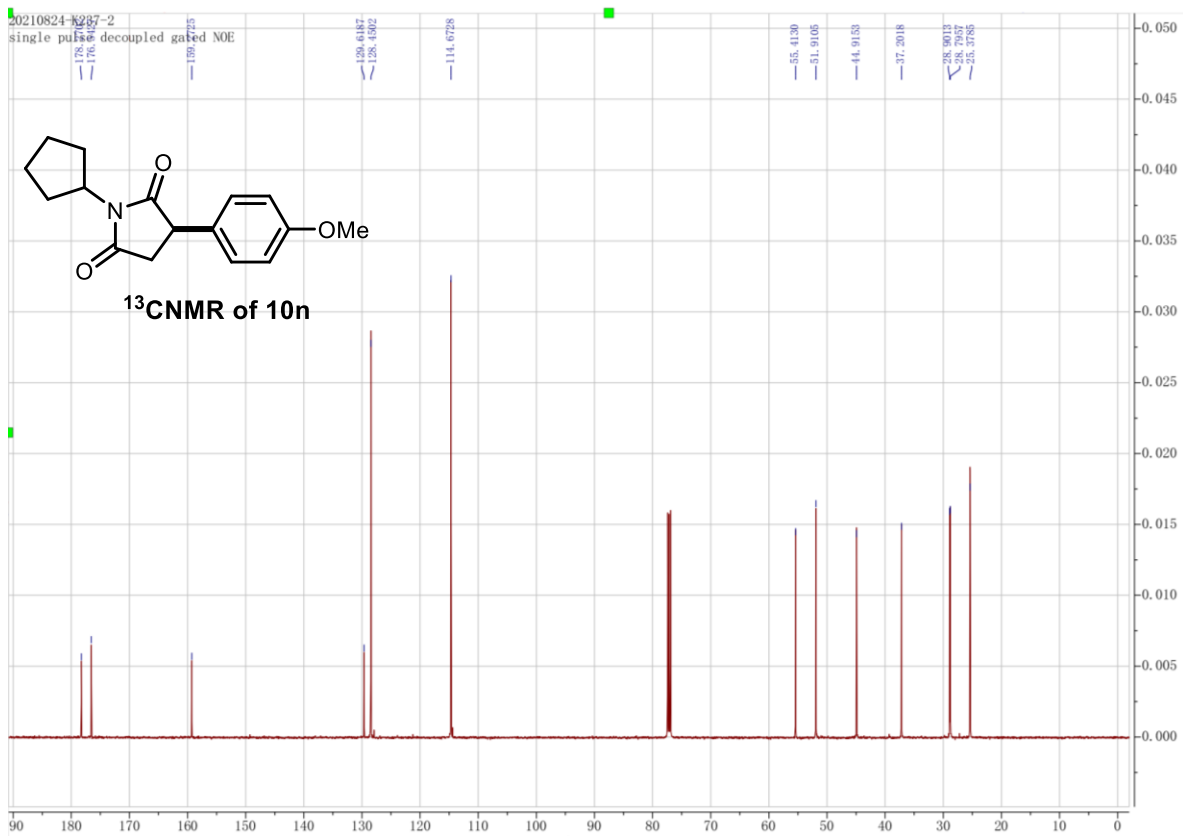





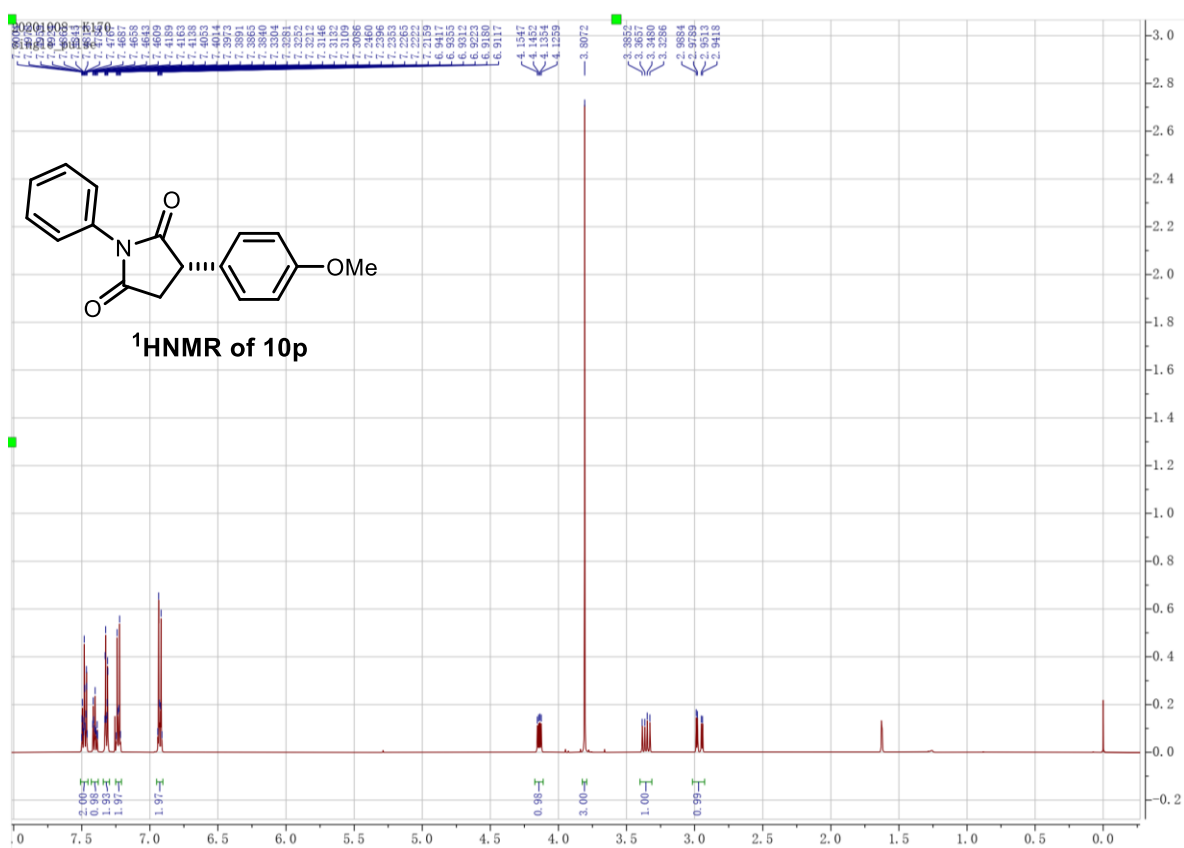







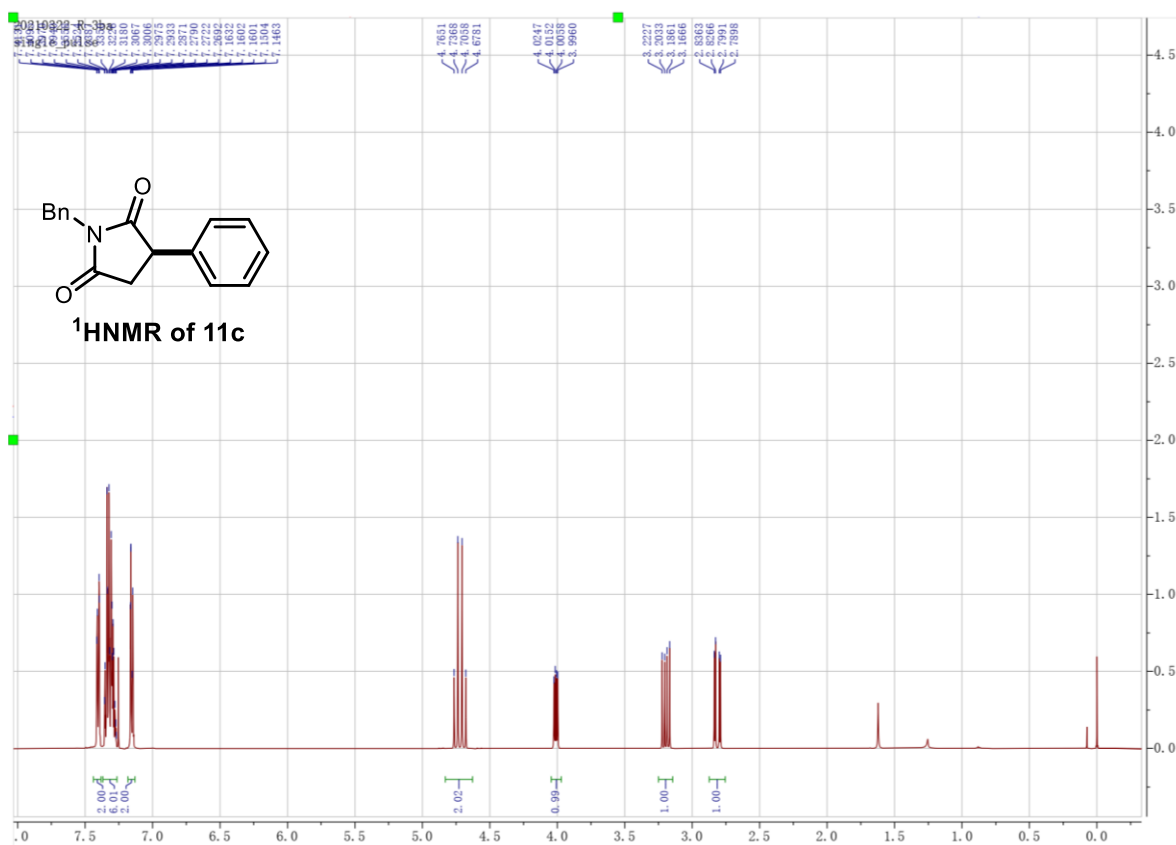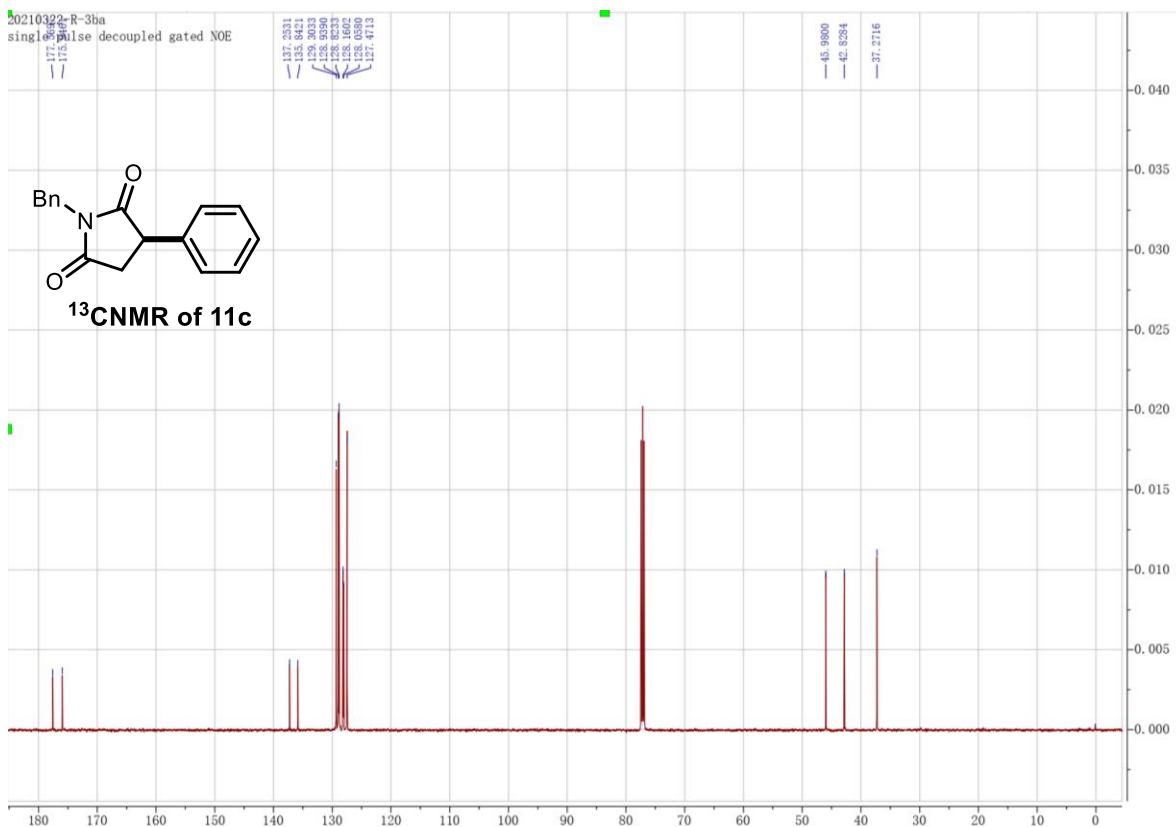









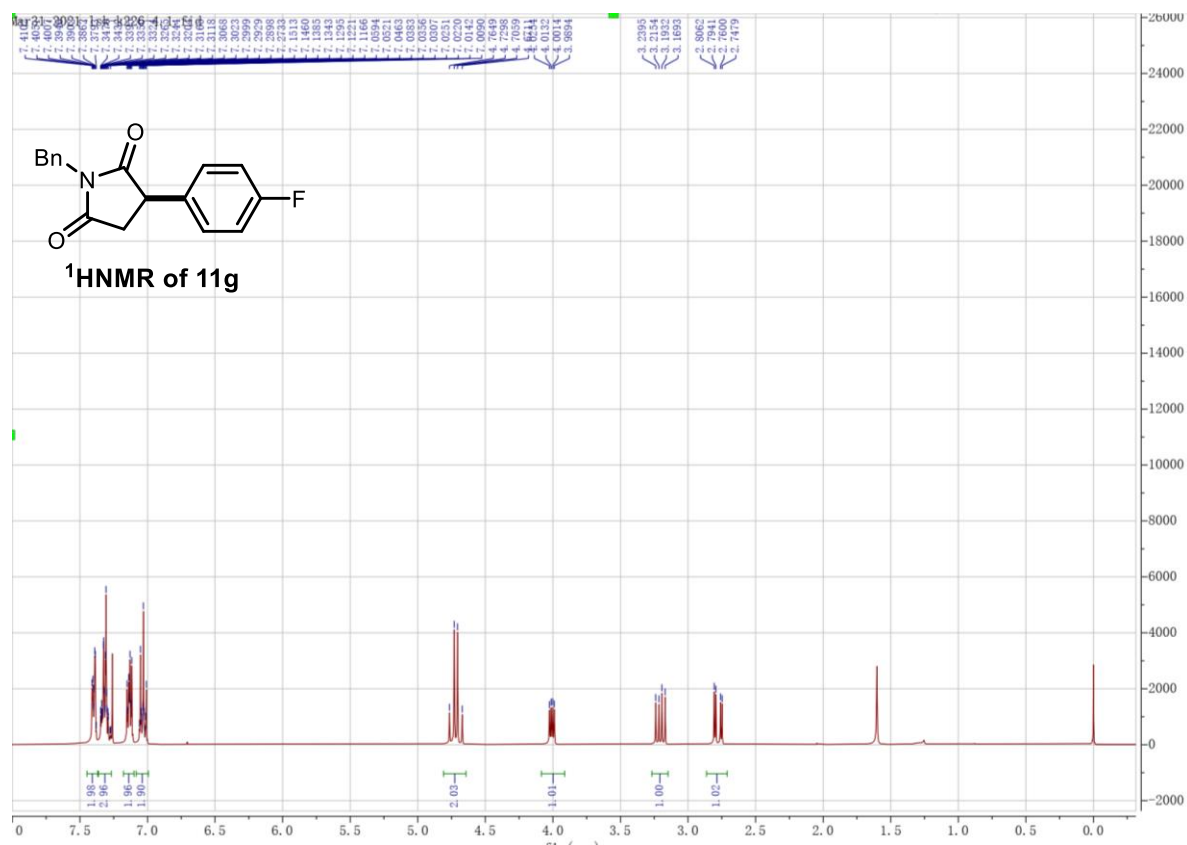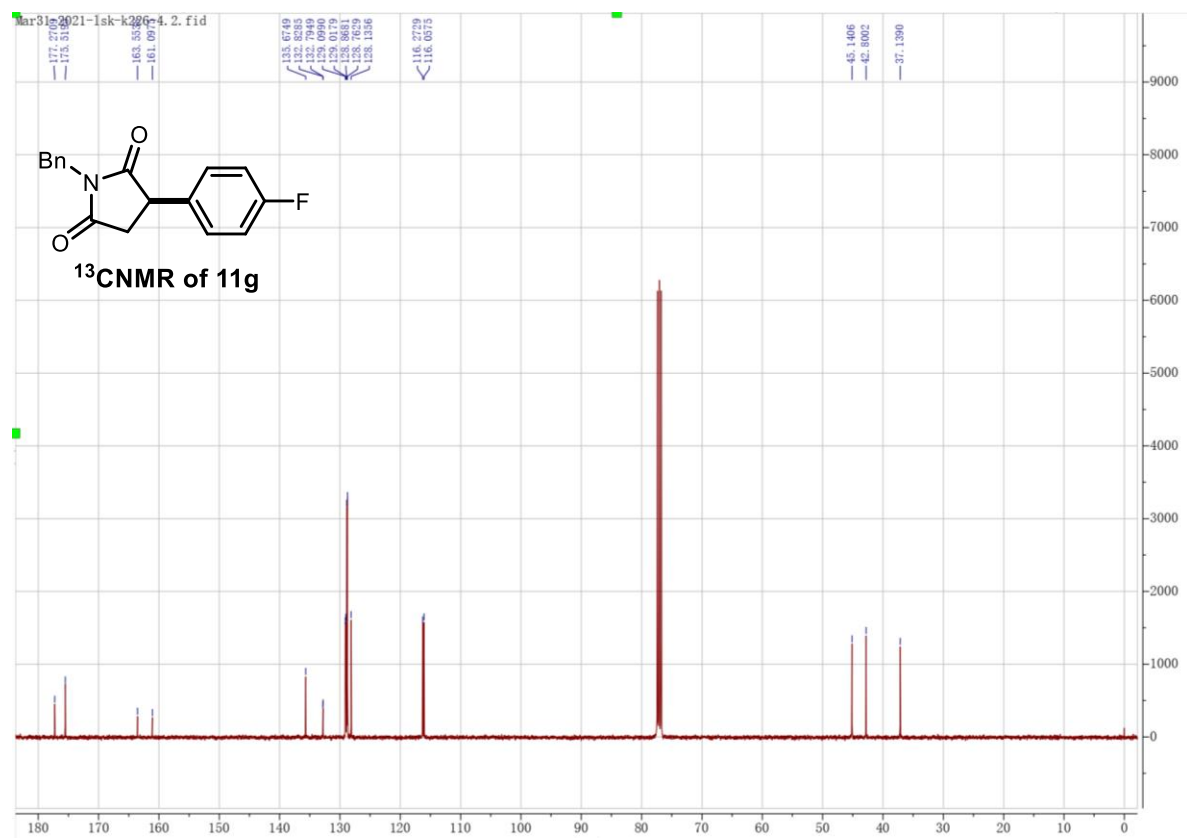



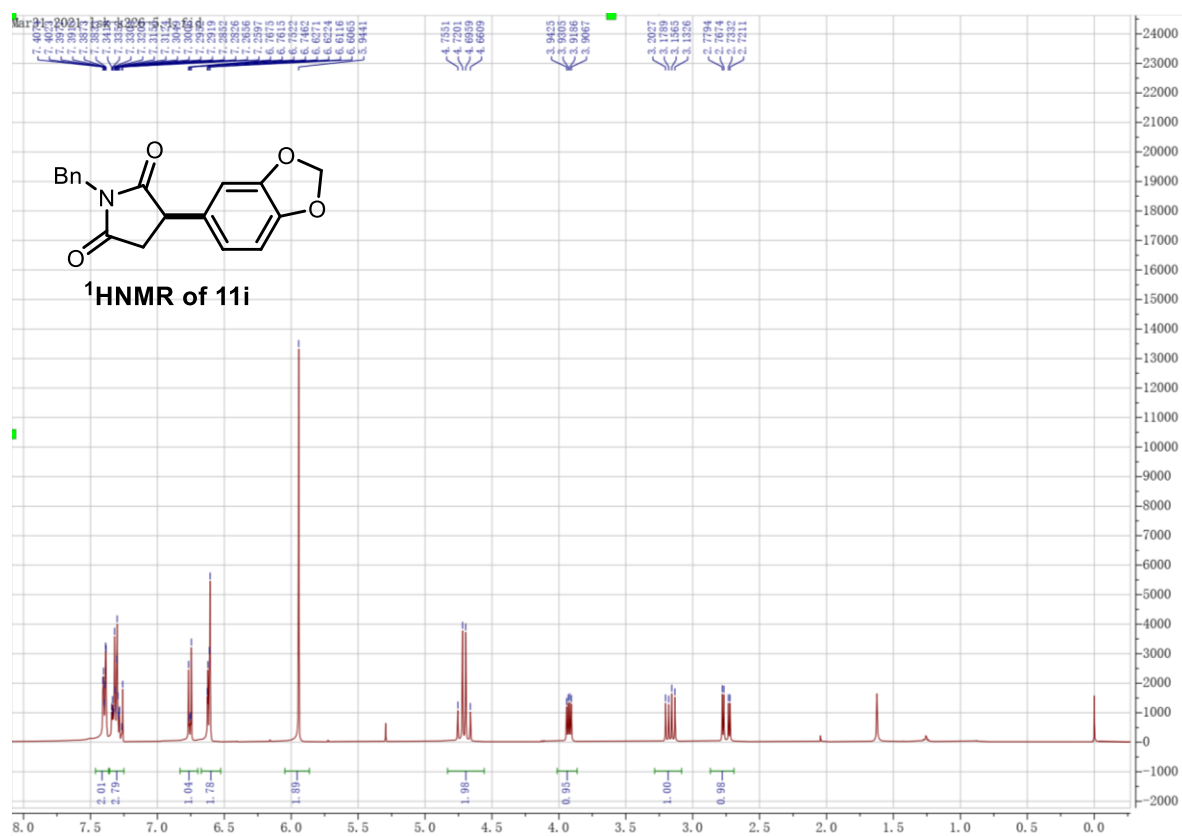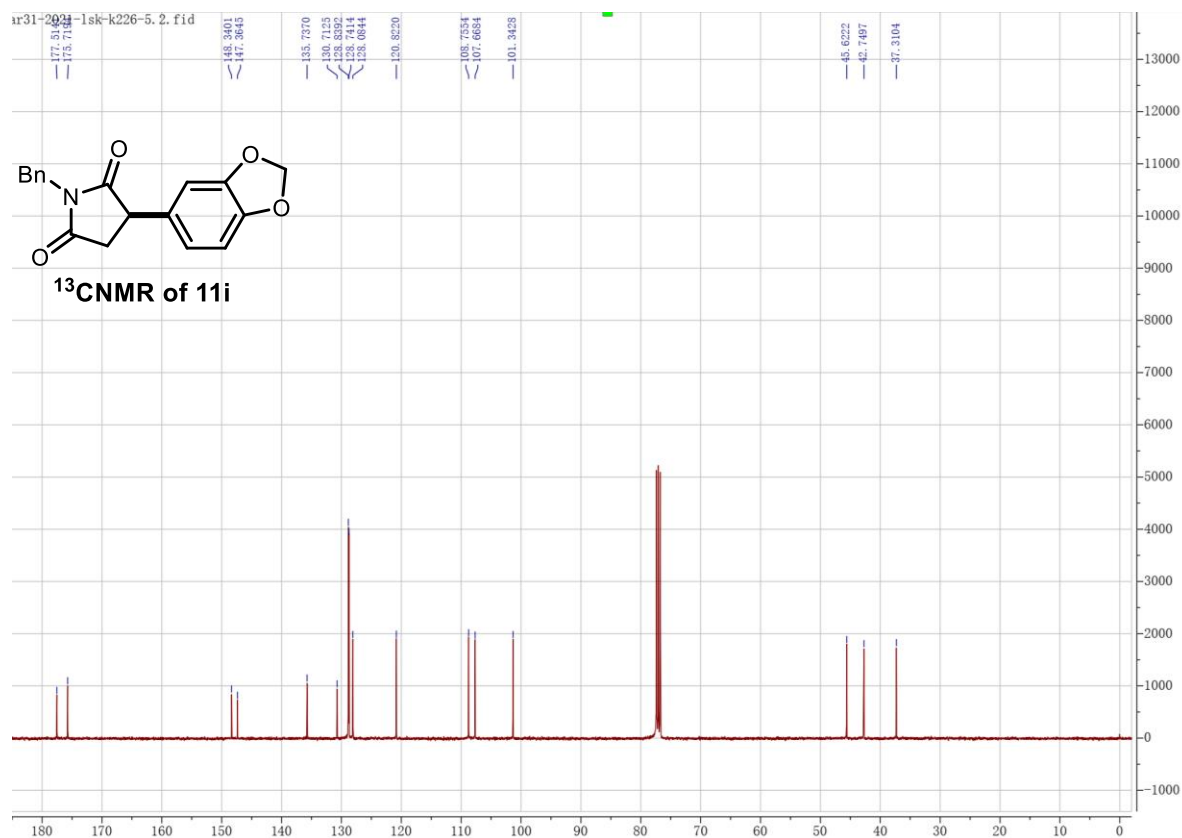

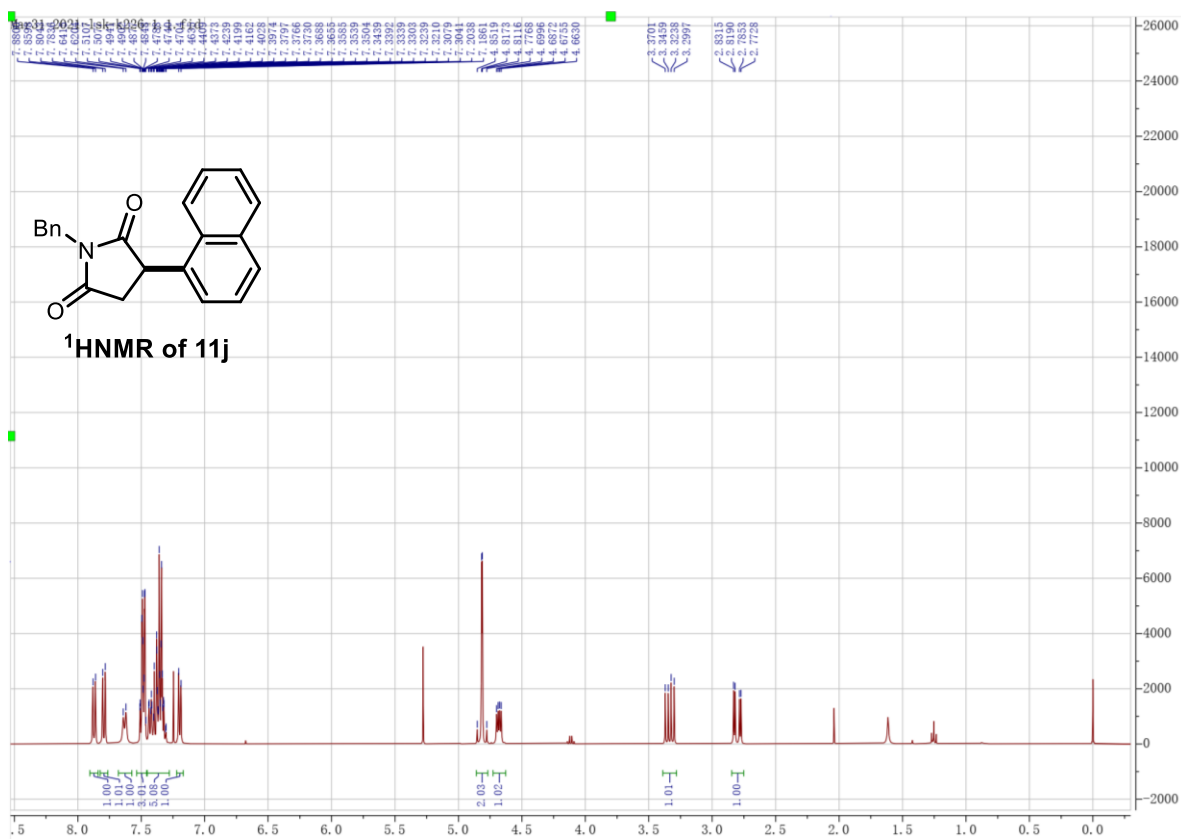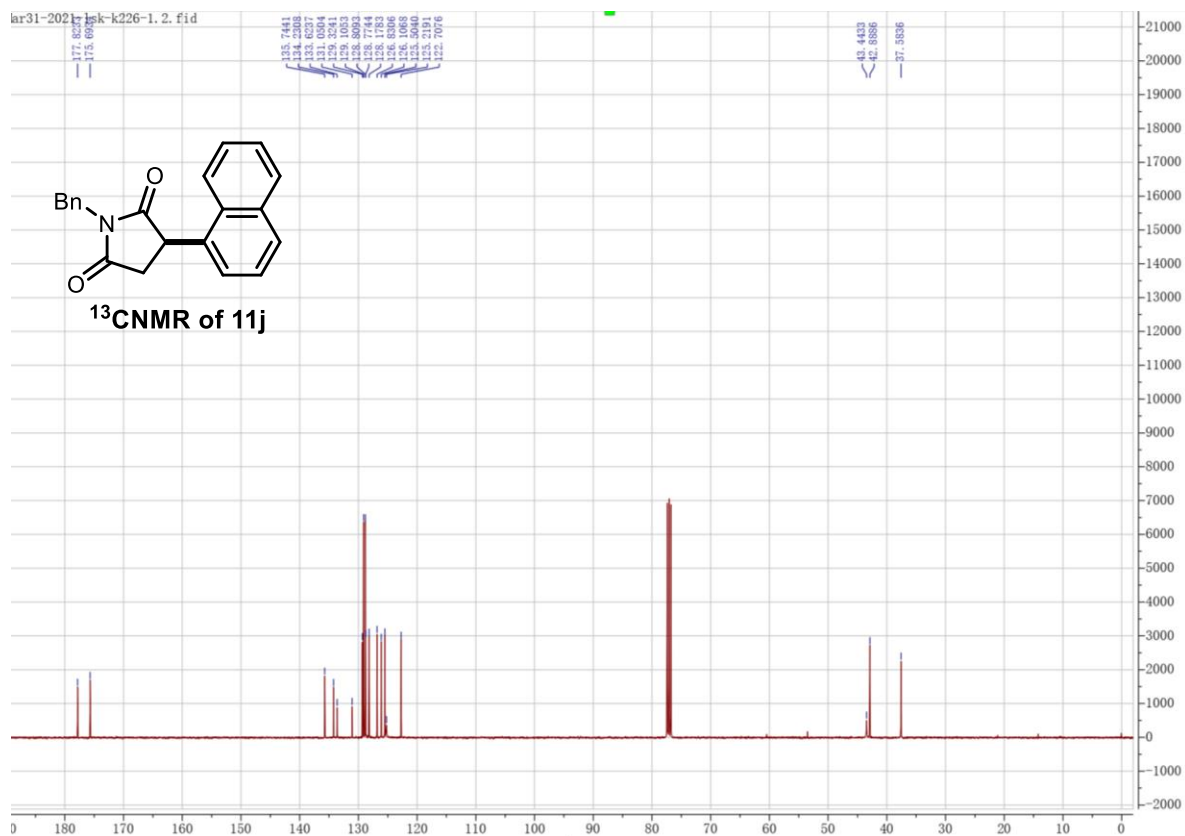



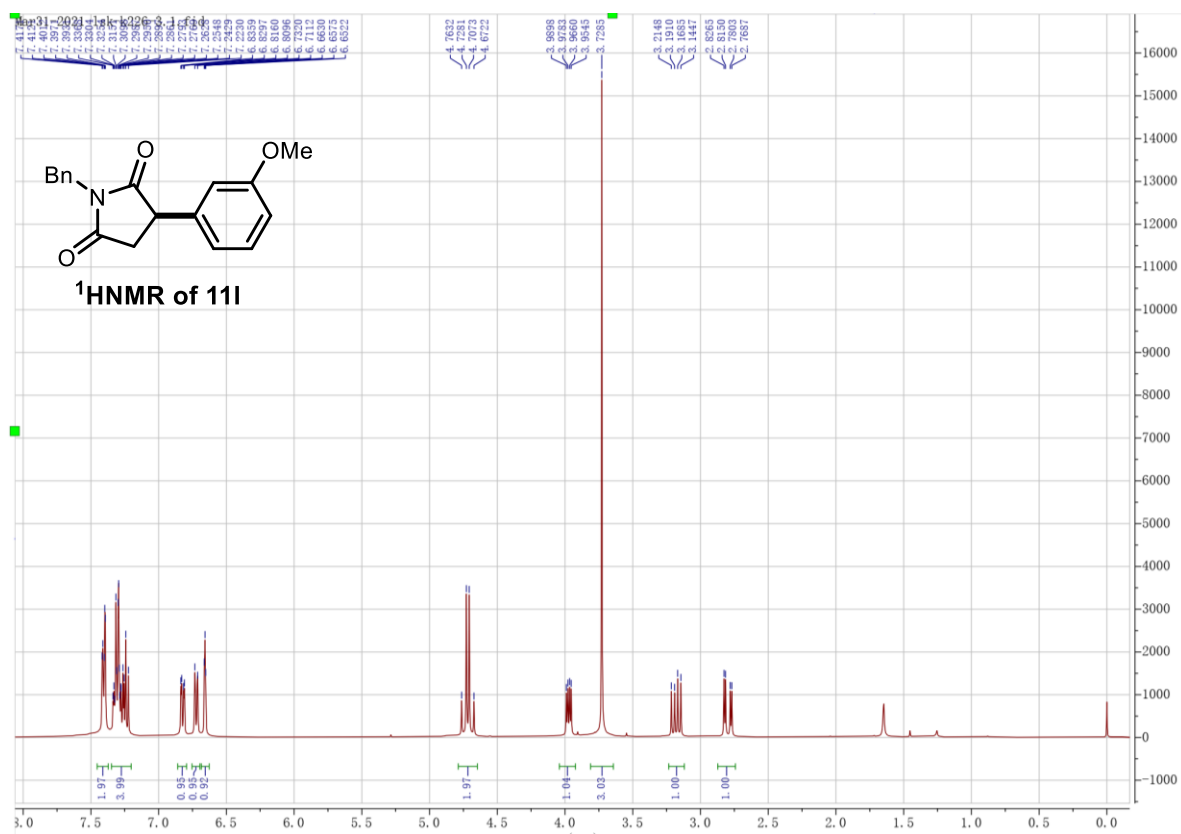

Supplement: d1qo01510a1.pdf [file d1qo01510a1.pdf]
